# Supplementary material for: Nonsense-Mediated Decay Targeted RNA (ntRNA): Proposal of a ntRNA–miRNA–lncRNA Triple Regulatory Network Usable as Biomarker of Prognostic Risk in Patients with Kidney Cancer
Source: MDPI journal article supplement (doi:10.3390/genes13091656), 2022-09-15
Supplement: s1 [file s1]

---

## Supplementary Tables

**Table S1.** List of 533 KIRC samples.

| TCGA_3Z_A93Z_01 | TCGA_B0_4821_01 | TCGA_B8_4620_01 | TCGA_BP_4969_01 | TCGA_CJ_4916_01 |
|-----------------|-----------------|-----------------|-----------------|-----------------|
| TCGA_6D_AA2E_01 | TCGA_B0_4822_01 | TCGA_B8_4621_01 | TCGA_BP_4970_01 | TCGA_CJ_4918_01 |
| TCGA_A3_3306_01 | TCGA_B0_4823_01 | TCGA_B8_4622_01 | TCGA_BP_4971_01 | TCGA_CJ_4920_01 |
| TCGA_A3_3307_01 | TCGA_B0_4824_01 | TCGA_B8_5158_01 | TCGA_BP_4972_01 | TCGA_CJ_4923_01 |
| TCGA_A3_3308_01 | TCGA_B0_4827_01 | TCGA_B8_5159_01 | TCGA_BP_4973_01 | TCGA_CJ_5671_01 |
| TCGA_A3_3311_01 | TCGA_B0_4828_01 | TCGA_B8_5162_01 | TCGA_BP_4974_01 | TCGA_CJ_5672_01 |
| TCGA_A3_3313_01 | TCGA_B0_4833_01 | TCGA_B8_5163_01 | TCGA_BP_4975_01 | TCGA_CJ_5675_01 |
| TCGA_A3_3316_01 | TCGA_B0_4834_01 | TCGA_B8_5164_01 | TCGA_BP_4976_01 | TCGA_CJ_5676_01 |
| TCGA_A3_3317_01 | TCGA_B0_4836_01 | TCGA_B8_5165_01 | TCGA_BP_4977_01 | TCGA_CJ_5677_01 |
| TCGA_A3_3319_01 | TCGA_B0_4837_01 | TCGA_B8_5545_01 | TCGA_BP_4981_01 | TCGA_CJ_5678_01 |
| TCGA_A3_3320_01 | TCGA_B0_4838_01 | TCGA_B8_5546_01 | TCGA_BP_4982_01 | TCGA_CJ_5679_01 |
| TCGA_A3_3322_01 | TCGA_B0_4839_01 | TCGA_B8_5549_01 | TCGA_BP_4983_01 | TCGA_CJ_5680_01 |
| TCGA_A3_3323_01 | TCGA_B0_4841_01 | TCGA_B8_5550_01 | TCGA_BP_4985_01 | TCGA_CJ_5681_01 |
| TCGA_A3_3324_01 | TCGA_B0_4842_01 | TCGA_B8_5551_01 | TCGA_BP_4986_01 | TCGA_CJ_5682_01 |
| TCGA_A3_3325_01 | TCGA_B0_4843_01 | TCGA_B8_5552_01 | TCGA_BP_4987_01 | TCGA_CJ_5683_01 |
| TCGA_A3_3326_01 | TCGA_B0_4844_01 | TCGA_B8_5553_01 | TCGA_BP_4988_01 | TCGA_CJ_5684_01 |
| TCGA_A3_3328_01 | TCGA_B0_4845_01 | TCGA_B8_A54D_01 | TCGA_BP_4989_01 | TCGA_CJ_5686_01 |
| TCGA_A3_3329_01 | TCGA_B0_4846_01 | TCGA_B8_A54E_01 | TCGA_BP_4991_01 | TCGA_CJ_5689_01 |
| TCGA_A3_3331_01 | TCGA_B0_4847_01 | TCGA_B8_A54F_01 | TCGA_BP_4992_01 | TCGA_CJ_6027_01 |
| TCGA_A3_3335_01 | TCGA_B0_4848_01 | TCGA_B8_A54G_01 | TCGA_BP_4993_01 | TCGA_CJ_6028_01 |
| TCGA_A3_3343_01 | TCGA_B0_4849_01 | TCGA_B8_A54H_01 | TCGA_BP_4994_01 | TCGA_CJ_6030_01 |
| TCGA_A3_3346_01 | TCGA_B0_4852_01 | TCGA_B8_A54I_01 | TCGA_BP_4995_01 | TCGA_CJ_6031_01 |
| TCGA_A3_3347_01 | TCGA_B0_4945_01 | TCGA_B8_A54J_01 | TCGA_BP_4998_01 | TCGA_CJ_6032_01 |
| TCGA_A3_3349_01 | TCGA_B0_5075_01 | TCGA_B8_A54K_01 | TCGA_BP_4999_01 | TCGA_CJ_6033_01 |
| TCGA_A3_3351_01 | TCGA_B0_5077_01 | TCGA_B8_A7U6_01 | TCGA_BP_5000_01 | TCGA_CW_5580_01 |
| TCGA_A3_3352_01 | TCGA_B0_5080_01 | TCGA_B8_A8YJ_01 | TCGA_BP_5001_01 | TCGA_CW_5581_01 |
| TCGA_A3_3357_01 | TCGA_B0_5081_01 | TCGA_BP_4158_01 | TCGA_BP_5004_01 | TCGA_CW_5583_01 |
| TCGA_A3_3358_01 | TCGA_B0_5083_01 | TCGA_BP_4159_01 | TCGA_BP_5006_01 | TCGA_CW_5584_01 |
| TCGA_A3_3359_01 | TCGA_B0_5084_01 | TCGA_BP_4160_01 | TCGA_BP_5007_01 | TCGA_CW_5585_01 |
| TCGA_A3_3362_01 | TCGA_B0_5085_01 | TCGA_BP_4161_01 | TCGA_BP_5008_01 | TCGA_CW_5587_01 |
| TCGA_A3_3363_01 | TCGA_B0_5088_01 | TCGA_BP_4162_01 | TCGA_BP_5009_01 | TCGA_CW_5588_01 |
| TCGA_A3_3365_01 | TCGA_B0_5092_01 | TCGA_BP_4163_01 | TCGA_BP_5010_01 | TCGA_CW_5589_01 |
| TCGA_A3_3367_01 | TCGA_B0_5094_01 | TCGA_BP_4164_01 | TCGA_BP_5168_01 | TCGA_CW_5590_01 |
| TCGA_A3_3370_01 | TCGA_B0_5095_01 | TCGA_BP_4165_01 | TCGA_BP_5169_01 | TCGA_CW_5591_01 |
| TCGA_A3_3372_01 | TCGA_B0_5096_01 | TCGA_BP_4166_01 | TCGA_BP_5170_01 | TCGA_CW_6087_01 |
| TCGA_A3_3373_01 | TCGA_B0_5097_01 | TCGA_BP_4167_01 | TCGA_BP_5173_01 | TCGA_CW_6088_01 |
| TCGA_A3_3374_01 | TCGA_B0_5098_01 | TCGA_BP_4169_01 | TCGA_BP_5174_01 | TCGA_CW_6090_01 |
| TCGA_A3_3376_01 | TCGA_B0_5099_01 | TCGA_BP_4170_01 | TCGA_BP_5175_01 | TCGA_CW_6093_01 |
| TCGA_A3_3378_01 | TCGA_B0_5100_01 | TCGA_BP_4173_01 | TCGA_BP_5176_01 | TCGA_CW_6097_01 |

---

|                 |                 |                 |                 |                 |
|-----------------|-----------------|-----------------|-----------------|-----------------|
| TCGA_A3_3380_01 | TCGA_B0_5102_01 | TCGA_BP_4174_01 | TCGA_BP_5177_01 | TCGA_CZ_4853_01 |
| TCGA_A3_3382_01 | TCGA_B0_5104_01 | TCGA_BP_4176_01 | TCGA_BP_5178_01 | TCGA_CZ_4854_01 |
| TCGA_A3_3383_01 | TCGA_B0_5106_01 | TCGA_BP_4177_01 | TCGA_BP_5180_01 | TCGA_CZ_4856_01 |
| TCGA_A3_3385_01 | TCGA_B0_5107_01 | TCGA_BP_4325_01 | TCGA_BP_5181_01 | TCGA_CZ_4857_01 |
| TCGA_A3_3387_01 | TCGA_B0_5108_01 | TCGA_BP_4326_01 | TCGA_BP_5182_01 | TCGA_CZ_4858_01 |
| TCGA_A3_A6NI_01 | TCGA_B0_5109_01 | TCGA_BP_4327_01 | TCGA_BP_5183_01 | TCGA_CZ_4859_01 |
| TCGA_A3_A6NJ_01 | TCGA_B0_5110_01 | TCGA_BP_4329_01 | TCGA_BP_5184_01 | TCGA_CZ_4860_01 |
| TCGA_A3_A6NL_01 | TCGA_B0_5113_01 | TCGA_BP_4330_01 | TCGA_BP_5185_01 | TCGA_CZ_4861_01 |
| TCGA_A3_A6NN_01 | TCGA_B0_5115_01 | TCGA_BP_4331_01 | TCGA_BP_5186_01 | TCGA_CZ_4862_01 |
| TCGA_A3_A8CQ_01 | TCGA_B0_5116_01 | TCGA_BP_4332_01 | TCGA_BP_5187_01 | TCGA_CZ_4863_01 |
| TCGA_A3_A8OU_01 | TCGA_B0_5117_01 | TCGA_BP_4334_01 | TCGA_BP_5189_01 | TCGA_CZ_4864_01 |
| TCGA_A3_A8OV_01 | TCGA_B0_5119_01 | TCGA_BP_4335_01 | TCGA_BP_5190_01 | TCGA_CZ_4865_01 |
| TCGA_A3_A8OW_01 | TCGA_B0_5120_01 | TCGA_BP_4337_01 | TCGA_BP_5191_01 | TCGA_CZ_4866_01 |
| TCGA_A3_A8OX_01 | TCGA_B0_5121_01 | TCGA_BP_4338_01 | TCGA_BP_5192_01 | TCGA_CZ_5451_01 |
| TCGA_AK_3425_01 | TCGA_B0_5399_01 | TCGA_BP_4340_01 | TCGA_BP_5194_01 | TCGA_CZ_5452_01 |
| TCGA_AK_3426_01 | TCGA_B0_5400_01 | TCGA_BP_4341_01 | TCGA_BP_5195_01 | TCGA_CZ_5453_01 |
| TCGA_AK_3427_01 | TCGA_B0_5402_01 | TCGA_BP_4342_01 | TCGA_BP_5196_01 | TCGA_CZ_5454_01 |
| TCGA_AK_3428_01 | TCGA_B0_5690_01 | TCGA_BP_4343_01 | TCGA_BP_5198_01 | TCGA_CZ_5455_01 |
| TCGA_AK_3429_01 | TCGA_B0_5691_01 | TCGA_BP_4344_01 | TCGA_BP_5199_01 | TCGA_CZ_5456_01 |
| TCGA_AK_3431_01 | TCGA_B0_5692_01 | TCGA_BP_4345_01 | TCGA_BP_5200_01 | TCGA_CZ_5457_01 |
| TCGA_AK_3433_01 | TCGA_B0_5693_01 | TCGA_BP_4346_01 | TCGA_BP_5201_01 | TCGA_CZ_5458_01 |
| TCGA_AK_3434_01 | TCGA_B0_5694_01 | TCGA_BP_4347_01 | TCGA_BP_5202_01 | TCGA_CZ_5459_01 |
| TCGA_AK_3436_01 | TCGA_B0_5695_01 | TCGA_BP_4349_01 | TCGA_CJ_4634_01 | TCGA_CZ_5460_01 |
| TCGA_AK_3440_01 | TCGA_B0_5696_01 | TCGA_BP_4351_01 | TCGA_CJ_4635_01 | TCGA_CZ_5461_01 |
| TCGA_AK_3443_01 | TCGA_B0_5697_01 | TCGA_BP_4352_01 | TCGA_CJ_4636_01 | TCGA_CZ_5462_01 |
| TCGA_AK_3444_01 | TCGA_B0_5698_01 | TCGA_BP_4353_01 | TCGA_CJ_4637_01 | TCGA_CZ_5463_01 |
| TCGA_AK_3445_01 | TCGA_B0_5699_01 | TCGA_BP_4354_01 | TCGA_CJ_4638_01 | TCGA_CZ_5464_01 |
| TCGA_AK_3447_01 | TCGA_B0_5700_01 | TCGA_BP_4355_01 | TCGA_CJ_4639_01 | TCGA_CZ_5465_01 |
| TCGA_AK_3450_01 | TCGA_B0_5701_01 | TCGA_BP_4756_01 | TCGA_CJ_4640_01 | TCGA_CZ_5466_01 |
| TCGA_AK_3451_01 | TCGA_B0_5702_01 | TCGA_BP_4758_01 | TCGA_CJ_4641_01 | TCGA_CZ_5467_01 |
| TCGA_AK_3453_01 | TCGA_B0_5703_01 | TCGA_BP_4759_01 | TCGA_CJ_4642_01 | TCGA_CZ_5468_01 |
| TCGA_AK_3454_01 | TCGA_B0_5705_01 | TCGA_BP_4760_01 | TCGA_CJ_4643_01 | TCGA_CZ_5469_01 |
| TCGA_AK_3455_01 | TCGA_B0_5706_01 | TCGA_BP_4761_01 | TCGA_CJ_4644_01 | TCGA_CZ_5470_01 |
| TCGA_AK_3456_01 | TCGA_B0_5707_01 | TCGA_BP_4762_01 | TCGA_CJ_4868_01 | TCGA_CZ_5982_01 |
| TCGA_AK_3458_01 | TCGA_B0_5709_01 | TCGA_BP_4763_01 | TCGA_CJ_4869_01 | TCGA_CZ_5984_01 |
| TCGA_AK_3460_01 | TCGA_B0_5710_01 | TCGA_BP_4765_01 | TCGA_CJ_4870_01 | TCGA_CZ_5985_01 |
| TCGA_AK_3461_01 | TCGA_B0_5711_01 | TCGA_BP_4766_01 | TCGA_CJ_4871_01 | TCGA_CZ_5986_01 |
| TCGA_AK_3465_01 | TCGA_B0_5712_01 | TCGA_BP_4768_01 | TCGA_CJ_4872_01 | TCGA_CZ_5987_01 |
| TCGA_AS_3777_01 | TCGA_B0_5713_01 | TCGA_BP_4769_01 | TCGA_CJ_4873_01 | TCGA_CZ_5988_01 |
| TCGA_AS_3778_01 | TCGA_B0_5812_01 | TCGA_BP_4770_01 | TCGA_CJ_4874_01 | TCGA_CZ_5989_01 |
| TCGA_B0_4688_01 | TCGA_B2_3923_01 | TCGA_BP_4771_01 | TCGA_CJ_4875_01 | TCGA_DV_5565_01 |
| TCGA_B0_4690_01 | TCGA_B2_3924_01 | TCGA_BP_4774_01 | TCGA_CJ_4876_01 | TCGA_DV_5566_01 |
| TCGA_B0_4691_01 | TCGA_B2_4098_01 | TCGA_BP_4775_01 | TCGA_CJ_4878_01 | TCGA_DV_5567_01 |

---

|                 |                 |                 |                 |                 |
|-----------------|-----------------|-----------------|-----------------|-----------------|
| TCGA_B0_4693_01 | TCGA_B2_4099_01 | TCGA_BP_4776_01 | TCGA_CJ_4881_01 | TCGA_DV_5568_01 |
| TCGA_B0_4694_01 | TCGA_B2_4101_01 | TCGA_BP_4777_01 | TCGA_CJ_4882_01 | TCGA_DV_5569_01 |
| TCGA_B0_4696_01 | TCGA_B2_4102_01 | TCGA_BP_4781_01 | TCGA_CJ_4884_01 | TCGA_DV_5573_01 |
| TCGA_B0_4697_01 | TCGA_B2_5633_01 | TCGA_BP_4782_01 | TCGA_CJ_4885_01 | TCGA_DV_5574_01 |
| TCGA_B0_4698_01 | TCGA_B2_5635_01 | TCGA_BP_4784_01 | TCGA_CJ_4886_01 | TCGA_DV_5575_01 |
| TCGA_B0_4699_01 | TCGA_B2_5636_01 | TCGA_BP_4787_01 | TCGA_CJ_4887_01 | TCGA_DV_5576_01 |
| TCGA_B0_4700_01 | TCGA_B2_5639_01 | TCGA_BP_4789_01 | TCGA_CJ_4888_01 | TCGA_DV_A4VX_01 |
| TCGA_B0_4701_01 | TCGA_B2_5641_01 | TCGA_BP_4790_01 | TCGA_CJ_4889_01 | TCGA_DV_A4VZ_01 |
| TCGA_B0_4703_01 | TCGA_B2_A4SR_01 | TCGA_BP_4795_01 | TCGA_CJ_4890_01 | TCGA_DV_A4W0_01 |
| TCGA_B0_4706_01 | TCGA_B4_5377_01 | TCGA_BP_4797_01 | TCGA_CJ_4891_01 | TCGA_EU_5904_01 |
| TCGA_B0_4707_01 | TCGA_B4_5378_01 | TCGA_BP_4798_01 | TCGA_CJ_4892_01 | TCGA_EU_5905_01 |
| TCGA_B0_4710_01 | TCGA_B4_5832_01 | TCGA_BP_4799_01 | TCGA_CJ_4893_01 | TCGA_EU_5906_01 |
| TCGA_B0_4712_01 | TCGA_B4_5834_01 | TCGA_BP_4801_01 | TCGA_CJ_4894_01 | TCGA_EU_5907_01 |
| TCGA_B0_4713_01 | TCGA_B4_5835_01 | TCGA_BP_4803_01 | TCGA_CJ_4895_01 | TCGA_G6_A5PC_01 |
| TCGA_B0_4714_01 | TCGA_B4_5836_01 | TCGA_BP_4804_01 | TCGA_CJ_4897_01 | TCGA_G6_A8L6_01 |
| TCGA_B0_4718_01 | TCGA_B4_5838_01 | TCGA_BP_4807_01 | TCGA_CJ_4899_01 | TCGA_G6_A8L7_01 |
| TCGA_B0_4810_01 | TCGA_B4_5843_01 | TCGA_BP_4959_01 | TCGA_CJ_4900_01 | TCGA_G6_A8L8_01 |
| TCGA_B0_4811_01 | TCGA_B4_5844_01 | TCGA_BP_4960_01 | TCGA_CJ_4901_01 | TCGA_GK_A6C7_01 |
| TCGA_B0_4813_01 | TCGA_B8_4143_01 | TCGA_BP_4961_01 | TCGA_CJ_4902_01 | TCGA_MM_A563_01 |
| TCGA_B0_4814_01 | TCGA_B8_4146_01 | TCGA_BP_4962_01 | TCGA_CJ_4903_01 | TCGA_MM_A564_01 |
| TCGA_B0_4815_01 | TCGA_B8_4148_01 | TCGA_BP_4963_01 | TCGA_CJ_4904_01 | TCGA_MM_A84U_01 |
| TCGA_B0_4816_01 | TCGA_B8_4151_01 | TCGA_BP_4964_01 | TCGA_CJ_4905_01 | TCGA_MW_A4EC_01 |
| TCGA_B0_4817_01 | TCGA_B8_4153_01 | TCGA_BP_4965_01 | TCGA_CJ_4907_01 | TCGA_T7_A92I_01 |
| TCGA_B0_4818_01 | TCGA_B8_4154_01 | TCGA_BP_4967_01 | TCGA_CJ_4908_01 |                 |
| TCGA_B0_4819_01 | TCGA_B8_4619_01 | TCGA_BP_4968_01 | TCGA_CJ_4912_01 |                 |

---

**Table S2.** List of 72 normal samples.

|                 |                 |                 |                 |                 |
|-----------------|-----------------|-----------------|-----------------|-----------------|
| TCGA_A3_3358_11 | TCGA_B0_5709_11 | TCGA_CJ_5680_11 | TCGA_CZ_4863_11 | TCGA_CZ_5466_11 |
| TCGA_A3_3387_11 | TCGA_B0_5711_11 | TCGA_CJ_5681_11 | TCGA_CZ_4864_11 | TCGA_CZ_5467_11 |
| TCGA_B0_4700_11 | TCGA_B0_5712_11 | TCGA_CJ_5689_11 | TCGA_CZ_4865_11 | TCGA_CZ_5468_11 |
| TCGA_B0_4712_11 | TCGA_B2_5636_11 | TCGA_CJ_6030_11 | TCGA_CZ_5451_11 | TCGA_CZ_5469_11 |
| TCGA_B0_5402_11 | TCGA_B2_5641_11 | TCGA_CJ_6033_11 | TCGA_CZ_5452_11 | TCGA_CZ_5470_11 |
| TCGA_B0_5690_11 | TCGA_B8_4619_11 | TCGA_CW_5580_11 | TCGA_CZ_5453_11 | TCGA_CZ_5982_11 |
| TCGA_B0_5691_11 | TCGA_B8_4620_11 | TCGA_CW_5581_11 | TCGA_CZ_5454_11 | TCGA_CZ_5984_11 |
| TCGA_B0_5694_11 | TCGA_B8_4622_11 | TCGA_CW_5584_11 | TCGA_CZ_5455_11 | TCGA_CZ_5985_11 |
| TCGA_B0_5696_11 | TCGA_B8_5549_11 | TCGA_CW_5585_11 | TCGA_CZ_5456_11 | TCGA_CZ_5986_11 |
| TCGA_B0_5697_11 | TCGA_B8_5552_11 | TCGA_CW_5587_11 | TCGA_CZ_5457_11 | TCGA_CZ_5987_11 |
| TCGA_B0_5699_11 | TCGA_CJ_5672_11 | TCGA_CW_5589_11 | TCGA_CZ_5458_11 | TCGA_CZ_5988_11 |
| TCGA_B0_5701_11 | TCGA_CJ_5676_11 | TCGA_CW_5591_11 | TCGA_CZ_5461_11 | TCGA_CZ_5989_11 |
| TCGA_B0_5703_11 | TCGA_CJ_5677_11 | TCGA_CW_6087_11 | TCGA_CZ_5462_11 |                 |
| TCGA_B0_5705_11 | TCGA_CJ_5678_11 | TCGA_CW_6088_11 | TCGA_CZ_5463_11 |                 |
| TCGA_B0_5706_11 | TCGA_CJ_5679_11 | TCGA_CW_6090_11 | TCGA_CZ_5465_11 |                 |

**Table S3.** List of 296 HEntRNAs.

| <b>HEntRNA</b>    | <b>log 2FC<sub>mtRNA</sub></b> | <b>log10FDR<sub>mtRNA</sub></b> | <b>log10FDR<sub>gene</sub></b> |
|-------------------|--------------------------------|---------------------------------|--------------------------------|
| ABAT_33905_AA     | 3.024196                       | 38.29964                        | 10.14857                       |
| ABCA2_88247_RI    | 2.848441                       | 36.09568                        | 0.062121                       |
| ABCB8_82297_RI    | 1.551236                       | 39.02579                        | 5.91575                        |
| ABCB8_82298_RI    | 1.803856                       | 44.98714                        | 5.91575                        |
| ABCD4_28379_AA    | 1.896292                       | 45.41489                        | 2.135012                       |
| ABCF3_67845_AA    | 2.141905                       | 41.84423                        | 8.99355                        |
| ABHD3_44778_AD    | 2.353552                       | 85.42678                        | 5.822957                       |
| ACAA1_64015_AT    | 2.615823                       | 64.84883                        | 9.7305                         |
| ACAA1_64019_RI    | 2.696236                       | 84.7541                         | 9.7305                         |
| ACSM2A_99285_ES   | 2.057707                       | 53.06617                        | 2.195604                       |
| AGPAT4_78370_RI   | 1.496707                       | 36.72077                        | 10.00137                       |
| AKR1A1_2695_AT    | 2.128289                       | 69.75935                        | 1.577134                       |
| AKR1B1_81848_AD   | 2.471052                       | 45.18032                        | 1.644613                       |
| ALDH1L1_66589_ES  | 2.08004                        | 59.0253                         | 7.209504                       |
| ALDH2_24538_ES    | 2.271407                       | 39.61019                        | 8.652131                       |
| ALDH3A2_39759_ES  | 3.238691                       | 49.78073                        | 8.070962                       |
| ANGEL1_28558_AP   | 1.308627                       | 37.29019                        | 5.29024                        |
| ANO8_48279_AA     | 1.829069                       | 39.11718                        | 8.903958                       |
| AP3B2_32238_AT    | 1.041681                       | 47.1637                         | 1.771349                       |
| APPL2_24127_AP    | 1.884248                       | 48.43513                        | 1.764063                       |
| ARFIP2_14135_ES   | 1.338411                       | 41.47889                        | 2.126422                       |
| ARHGAP21_11012_ES | 1.875576                       | 41.99585                        | 1.361264                       |
| ARHGAP32_19451_RI | 1.803196                       | 69.24195                        | 3.518725                       |
| ARPC4_63182_ES    | 1.469225                       | 40.05207                        | 0.12177                        |
| ATMIN_37749_AP    | 1.654411                       | 37.28245                        | 4.24262                        |
| ATP6V0B_2509_RI   | 1.803543                       | 50.07319                        | 4.83205                        |
| BCAT2_50813_AT    | 1.931115                       | 46.62958                        | 0.344357                       |
| BLOC1S1_22230_AP  | 1.710141                       | 55.69965                        | 4.58928                        |
| BLOC1S1_22233_RI  | 1.902104                       | 47.43404                        | 4.58928                        |
| BRF1_29605_AP     | 2.148036                       | 69.92452                        | 1.626097                       |
| BSDC1_1591_RI     | 1.661393                       | 49.64427                        | 0.928108                       |
| BTBD8_3754_AT     | 1.475675                       | 57.39308                        | 8.398894                       |
| C11orf54_18326_ES | 1.643038                       | 44.39177                        | 6.008631                       |
| C14orf2_29526_RI  | 1.84195                        | 49.83436                        | 2.810086                       |
| C14orf79_29585_AP | 1.074562                       | 44.10106                        | 0.399022                       |
| C16orf58_36278_RI | 1.733395                       | 43.44969                        | 8.388519                       |
| C21orf59_60356_RI | 1.601794                       | 47.64174                        | 0.009094                       |
| C21orf59_60361_RI | 1.73421                        | 48.03416                        | 0.009094                       |
| C9orf156_87024_AP | 1.541433                       | 41.47017                        | 4.780518                       |

|                   |          |          |          |
|-------------------|----------|----------|----------|
| CABIN1_61386_AP   | 1.850782 | 45.40594 | 3.406388 |
| CALCOCO1_22108_RI | 2.255566 | 75.87747 | 2.974783 |
| CARM1_47600_ES    | 1.686049 | 34.35193 | 0.573743 |
| CBWD2_55055_ES    | 1.769887 | 50.09523 | 2.478041 |
| CCDC24_2525_RI    | 1.228814 | 54.74916 | 2.287838 |
| CCDC30_2081_AP    | 1.508678 | 58.90482 | 8.544673 |
| CEP68_53779_AT    | 1.215185 | 52.37682 | 0.46046  |
| CEP68_53781_AD    | 1.629673 | 38.71191 | 0.46046  |
| CIRBP_46432_RI    | 1.613457 | 50.34683 | 2.473937 |
| CLNK_68788_AT     | 1.054429 | 49.80375 | 0.492374 |
| COG4_37401_ES     | 2.286571 | 39.83714 | 2.92724  |
| COMMD4_31850_AA   | 2.052228 | 49.20222 | 3.240618 |
| COMT_61101_AA     | 1.192999 | 34.58205 | 4.099023 |
| CREB3L2_81912_AT  | 1.159181 | 34.48975 | 7.873967 |
| CTAGE5_27374_AP   | 2.963367 | 67.65013 | 8.604698 |
| D2HGDH_58422_ES   | 1.578844 | 39.22464 | 5.012904 |
| DAB2_71866_AD     | 1.113784 | 37.36332 | 6.297864 |
| DCAF13_84821_AT   | 1.761637 | 35.78612 | 6.621532 |
| DCAF8_8441_ES     | 1.553507 | 57.22512 | 3.152392 |
| DCTN1_54046_RI    | 1.84828  | 34.51915 | 0.888759 |
| DDRKG1_58577_AT   | 2.035185 | 60.79492 | 3.891905 |
| DDX46_73426_ES    | 2.417418 | 47.24384 | 5.500391 |
| DERA_20591_AP     | 3.609052 | 76.78661 | 5.851893 |
| DERA_20595_AT     | 1.797692 | 37.66826 | 5.851893 |
| DGAT1_85562_RI    | 1.710848 | 50.06497 | 1.323892 |
| DHRS4_26779_AT    | 1.658282 | 45.96846 | 5.694476 |
| DHRS4L2_26797_AT  | 1.754671 | 34.4003  | 5.588037 |
| DNAJC10_56461_AT  | 1.06219  | 55.74457 | 3.390777 |
| DNAJC4_16600_ES   | 1.633521 | 37.82488 | 7.267472 |
| DRG2_39548_RI     | 2.186314 | 58.47513 | 1.810853 |
| DYNC2LI1_53400_AA | 1.171245 | 69.66439 | 7.22675  |
| DYNC2LI1_53403_ES | 1.377139 | 82.95781 | 7.22675  |
| DYNLT1_78277_RI   | 2.481773 | 51.88689 | 2.346046 |
| DYNLT1_78278_RI   | 2.564187 | 56.01615 | 2.346046 |
| DZIP3_66037_RI    | 2.338264 | 55.24462 | 1.836995 |
| ECHDC2_3019_AT    | 1.323303 | 49.71189 | 2.31735  |
| ECHDC2_3020_AT    | 1.173724 | 34.70424 | 2.31735  |
| ECHDC2_3021_AT    | 1.389423 | 50.14053 | 2.31735  |
| EFR3B_52846_AT    | 1.586104 | 50.38759 | 2.705658 |
| EIF3M_14849_RI    | 1.644554 | 40.23202 | 9.503677 |
| EIF4A2_68054_ES   | 1.923066 | 92.85635 | 2.223024 |
| EIF4G1_67894_RI   | 2.189987 | 38.00471 | 1.329676 |
| ELF5_14951_AT     | 4.665085 | 216.1325 | 6.422464 |

---

|                    |          |          |          |
|--------------------|----------|----------|----------|
| ELMOD3_54246_RI    | 1.548391 | 35.83687 | 9.672123 |
| ENOSF1_44459_AP    | 1.415844 | 45.98305 | 0.044817 |
| ENOSF1_44474_ES    | 2.012967 | 57.68517 | 0.044817 |
| EPS8_20581_AP      | 1.723795 | 37.13235 | 10.15937 |
| EPS8L1_52012_ES    | 1.069086 | 35.62704 | 8.294275 |
| EPS8L2_13731_RI    | 2.124477 | 58.86505 | 2.19906  |
| ERAL1_40001_AD     | 2.254933 | 40.16826 | 7.144701 |
| ERP29_24568_AP     | 1.935706 | 39.11438 | 9.993459 |
| ESR1_78166_AT      | 1.606983 | 39.67379 | 6.605249 |
| ETFA_31930_ES      | 1.252154 | 37.71081 | 9.294656 |
| ETHE1_50198_AT     | 1.912134 | 47.14787 | 0.224923 |
| FAM149A_71398_AP   | 2.394443 | 66.56145 | 0.588201 |
| FAM162A_66433_AT   | 1.618287 | 41.46937 | 9.937433 |
| FAM173A_32963_RI   | 1.302731 | 38.9244  | 0.46047  |
| FAM192A_36525_AP   | 1.683818 | 42.32046 | 3.756398 |
| FAM73B_87818_AD    | 1.428577 | 39.20092 | 7.937716 |
| FAM73B_87819_AA    | 2.102819 | 50.33188 | 7.937716 |
| FASTK_82333_RI     | 1.619799 | 48.16946 | 9.28281  |
| FASTK_82334_RI     | 1.316193 | 54.03384 | 9.28281  |
| FASTK_82335_RI     | 1.783954 | 50.87433 | 9.28281  |
| FASTK_82336_RI     | 1.603566 | 50.4551  | 9.28281  |
| FGD3_86889_AP      | 2.041983 | 42.36843 | 5.264461 |
| FGD3_86895_RI      | 1.715842 | 47.47726 | 5.264461 |
| FLAD1_7867_RI      | 2.233935 | 55.23726 | 8.308244 |
| FOXRED1_19379_AD   | 2.019014 | 41.96437 | 9.504087 |
| FUK_37385_AT       | 1.381686 | 34.78616 | 2.612206 |
| GALK1_43496_RI     | 1.859258 | 35.88082 | 0.185806 |
| GANAB_16377_AT     | 1.795294 | 41.05331 | 2.389735 |
| GATM_30419_AT      | 2.839312 | 56.69938 | 7.667683 |
| GET4_78552_AP      | 1.456012 | 51.216   | 0.82408  |
| GLS2_22442_RI      | 2.277279 | 60.17693 | 2.383725 |
| GPR116_76429_ES    | 1.540522 | 50.61586 | 3.042824 |
| GPR56_36576_AP     | -1.54515 | 79.06646 | 5.934634 |
| GSK3A_50137_AP     | 1.064534 | 48.37607 | 2.177974 |
| GSS_59053_RI       | 2.248318 | 59.51261 | 0.244555 |
| GSTM4_4055_RI      | 1.883734 | 40.5669  | 9.549291 |
| GSTM4_4056_RI      | 2.177108 | 42.2852  | 9.549291 |
| GTF2H1_14598_AP    | 1.797063 | 52.23936 | 1.074371 |
| GTF2H2C_72386_AT   | 1.039818 | 49.37504 | 4.572421 |
| GTF2IRD2_80093_AT  | 1.23765  | 47.0078  | 2.590633 |
| GTF2IRD2B_80104_AT | 1.172909 | 47.02801 | 0.729904 |
| GTF3C5_88005_AT    | 1.7615   | 55.52846 | 4.528212 |
| HARS2_73740_AT     | 1.812809 | 47.49969 | 1.913949 |

---

|                   |          |          |          |
|-------------------|----------|----------|----------|
| HARS2_73745_RI    | 2.198562 | 77.67928 | 1.913949 |
| HDAC6_89011_RI    | 2.516172 | 61.00044 | 2.327501 |
| HEATR6_42848_ES   | 1.257536 | 35.58506 | 4.547757 |
| HECTD3_2592_RI    | 2.640538 | 48.20682 | 3.58684  |
| HMBS_19098_RI     | 1.323033 | 35.20716 | 0.269263 |
| HNRNPL_49699_ES   | 1.165252 | 35.00127 | 2.607038 |
| HOOK2_47862_AP    | 2.366573 | 90.88839 | 4.263409 |
| HOOK2_47868_AD    | 1.783067 | 89.97882 | 4.263409 |
| IFT20_39879_AT    | 1.275909 | 35.13027 | 1.987004 |
| IL11RA_86211_AT   | 1.105121 | 42.31895 | 0.861696 |
| IL13RA1_89940_AP  | 1.484682 | 37.29096 | 3.597331 |
| IL1R1_54770_AP    | 1.203157 | 38.87957 | 4.405379 |
| IMPA1_84296_ES    | 1.799225 | 44.44287 | 0.564943 |
| INTS3_7758_RI     | 2.705354 | 76.65733 | 5.798183 |
| JTB_7776_RI       | 1.389664 | 55.34938 | 1.355027 |
| KCNAB2_367_RI     | 2.324407 | 42.11941 | 0.588844 |
| KIAA1407_66238_AD | 1.161752 | 37.99501 | 3.423705 |
| KIFC3_36609_AD    | 1.588464 | 42.67927 | 9.242216 |
| KLC2_16990_AP     | 1.754799 | 51.5138  | 6.002796 |
| KLC2_16992_RI     | 2.304963 | 61.4167  | 6.002796 |
| KLHDC2_27443_RI   | 1.951563 | 50.31634 | 3.801067 |
| KLHL3_73482_AT    | 1.851218 | 75.72655 | 9.836923 |
| LTBP3_16861_AP    | 1.306495 | 35.84903 | 0.120708 |
| MAEA_68465_AP     | 2.217394 | 66.14887 | 4.412247 |
| MAGT1_89536_AT    | 1.178687 | 64.49394 | 3.752831 |
| MBTD1_42521_RI    | 1.756278 | 42.12122 | 5.272804 |
| METTL3_26596_RI   | 1.012642 | 37.92424 | 7.026274 |
| MFSD1_67452_ES    | 1.666424 | 38.87397 | 1.820182 |
| MFSD6_56566_AP    | 1.419307 | 34.5128  | 7.476356 |
| MINK1_38600_ES    | 2.160409 | 35.92569 | 0.755534 |
| MIOX_62834_AA     | 1.410267 | 44.22425 | 6.128424 |
| MLXIP_24922_AP    | 1.588766 | 46.51724 | 1.327338 |
| MON2_22832_AP     | 2.258642 | 35.98527 | 1.130957 |
| MPDU1_38997_AT    | 1.128616 | 36.68091 | 2.233113 |
| MRC2_42908_AP     | 2.666847 | 38.35407 | 0.229561 |
| MRPL20_166_AT     | 1.368384 | 41.73893 | 2.045862 |
| MRPL32_79325_AD   | 1.763716 | 47.09443 | 0.924661 |
| MT1E_36479_RI     | 2.081652 | 37.61578 | 3.401553 |
| MT1X_36493_AT     | 2.351733 | 39.95009 | 4.446597 |
| MTCH1_75999_AT    | 2.259877 | 73.09596 | 6.50039  |
| MYO19_40482_AA    | 1.004459 | 58.48487 | 2.095364 |
| NAA40_16552_AA    | 1.461801 | 34.8085  | 7.560718 |
| NDUFB2_82018_AP   | 1.174302 | 35.84913 | 7.328392 |



|                  |          |          |          |
|------------------|----------|----------|----------|
| NDUFB8_12825_AT  | 1.870719 | 40.88349 | 1.798626 |
| NDUFS3_15785_RI  | 2.208794 | 44.97522 | 8.529923 |
| NDUFS7_46466_RI  | 1.332018 | 42.48938 | 0.138348 |
| NDUFS8_17279_AD  | 1.263671 | 40.11085 | 3.539822 |
| NFAT5_37288_AT   | 1.030911 | 52.52677 | 8.167814 |
| NIPAL3_1109_AT   | 1.411645 | 54.79725 | 8.413578 |
| NOP58_56946_ES   | 1.527595 | 45.94242 | 10.17813 |
| NPEPPS_42080_AD  | 1.915414 | 65.93617 | 1.186741 |
| NPEPPS_42084_ES  | 1.611017 | 55.87752 | 1.186741 |
| NPRL2_65034_RI   | 2.528435 | 63.97018 | 3.93306  |
| NPRL2_65037_RI   | 2.52884  | 73.40496 | 3.93306  |
| NR4A1_21887_AP   | 1.826139 | 36.07856 | 2.713627 |
| OSGEP_26442_AD   | 1.457656 | 39.02982 | 8.074937 |
| OSGEP_26443_RI   | 1.674608 | 45.09196 | 8.074937 |
| PARP2_26426_RI   | 1.475583 | 39.84413 | 2.543534 |
| PARVA_14430_AT   | 2.20077  | 36.14335 | 6.203322 |
| PBXIP1_7843_AT   | 2.138785 | 36.58571 | 5.045193 |
| PCBP2_22046_AT   | 1.626906 | 46.85918 | 0.960894 |
| PCTP_42588_AA    | 1.204755 | 37.89182 | 0.939734 |
| PCYT1A_68233_AA  | 1.719919 | 38.6039  | 0.112209 |
| PDPR_37331_ES    | 1.737009 | 39.64727 | 2.017122 |
| PDPR_37332_AA    | 1.090677 | 35.00501 | 2.017122 |
| PDZD3_100577_RI  | 1.244998 | 46.4893  | 0.237482 |
| PHF12_40025_RI   | 1.385763 | 44.73    | 5.468385 |
| PHF12_40026_RI   | 1.292906 | 53.12697 | 5.468385 |
| PLEKHH2_53393_ES | 1.192724 | 41.60306 | 1.470348 |
| PLEKHM3_57206_AT | 2.024024 | 34.8781  | 6.071314 |
| PLSCR1_67157_AT  | 1.245285 | 35.73641 | 0.109843 |
| PMPCA_88166_AT   | 1.96691  | 42.27771 | 3.723676 |
| POLB_83706_AP    | 2.269689 | 43.66684 | 2.384992 |
| PPIL4_78083_AP   | 2.005113 | 37.41032 | 8.73485  |
| PPP2R4_87835_AP  | 1.576669 | 46.88269 | 5.410617 |
| PSMA2_79317_AT   | 1.203918 | 60.5869  | 9.648639 |
| PSMA7_60044_AT   | 1.828876 | 56.78339 | 3.876145 |
| PSMB7_87531_AT   | 1.272464 | 36.83898 | 7.664151 |
| PTK7_76245_AT    | 1.040428 | 47.68613 | 5.784017 |
| RAB11B_47227_AT  | 1.196865 | 60.45356 | 6.039839 |
| RABEP2_35894_ES  | 1.200911 | 43.15293 | 5.469229 |
| RASA1_72717_ES   | 1.913051 | 37.21102 | 1.280337 |
| RBM6_64936_RI    | 1.456512 | 43.65651 | 1.662491 |
| RBM7_18823_RI    | 1.005994 | 34.30278 | 0.71867  |
| RCOR3_9711_ES    | 1.098587 | 38.99151 | 0.380824 |
| RFX5_7609_ES     | 1.517257 | 57.26862 | 1.071632 |

|                   |          |          |          |
|-------------------|----------|----------|----------|
| RIC8B_24156_AP    | 1.724389 | 37.4465  | 1.907232 |
| RMND1_78158_AD    | 1.209889 | 53.18362 | 0.998501 |
| RNF216_78674_AA   | 3.495888 | 46.24212 | 4.039863 |
| RNF4_68571_AT     | 1.909733 | 45.8812  | 1.510495 |
| ROGDI_33857_AD    | 2.607522 | 57.87275 | 5.099435 |
| RPAP1_30095_RI    | 1.843081 | 40.89188 | 2.316742 |
| RRM2B_84774_ES    | 1.397889 | 59.67963 | 2.260299 |
| RSAD1_42400_AD    | 1.750304 | 35.08452 | 1.080659 |
| RWDD2A_76867_RI   | 1.098034 | 35.08818 | 2.510196 |
| SAT1_88697_AT     | 1.334909 | 40.32939 | 0.026127 |
| SEC24C_12174_RI   | 1.930012 | 97.69473 | 3.259443 |
| SERP1_67272_AT    | 1.609945 | 38.38999 | 2.223193 |
| SGSM2_38395_RI    | 1.919237 | 57.75219 | 4.004276 |
| SGSM3_62346_RI    | 1.80325  | 65.064   | 0.065758 |
| SH3YL1_52491_AP   | 1.892284 | 35.8778  | 8.100098 |
| SH3YL1_52495_AP   | 1.809885 | 77.25702 | 8.100098 |
| SLC23A3_57600_AD  | 1.897054 | 40.86007 | 0.453574 |
| SLC25A46_72943_AP | 1.923962 | 42.02293 | 5.572627 |
| SLC35A4_73686_AP  | 2.194849 | 36.33893 | 3.931704 |
| SLC39A13_15746_RI | 2.178064 | 39.7108  | 4.111019 |
| SLC39A13_15747_RI | 1.828466 | 54.23622 | 4.111019 |
| SLC39A13_15748_RI | 2.483085 | 52.14755 | 4.111019 |
| SLC3A2_16463_AP   | 2.417293 | 77.44249 | 4.247983 |
| SLC6A6_63527_AT   | 1.447641 | 37.83154 | 2.791388 |
| SLC9A1_1313_AT    | 1.231407 | 41.01963 | 9.667517 |
| SMARCD3_82363_RI  | 1.55755  | 62.25521 | 1.749625 |
| SNAP23_30179_AA   | 2.711035 | 45.67288 | 1.656646 |
| SNX13_78881_RI    | 1.719325 | 47.34655 | 5.043275 |
| SNX29_34058_ES    | 1.236321 | 37.7738  | 4.35009  |
| SORD_30379_AT     | 2.425074 | 57.8192  | 9.712734 |
| SOX15_39009_AT    | 1.565721 | 42.65722 | 0.914532 |
| SPINK1_73964_AT   | 2.931095 | 47.29951 | 1.853148 |
| SRGAP1_22854_AP   | 1.456364 | 35.4124  | 0.963846 |
| SRI_80359_ES      | 2.382843 | 43.87881 | 0.768734 |
| SSB_55885_ES      | 1.153132 | 40.54384 | 2.186569 |
| SSH3_17164_RI     | 1.871071 | 49.56862 | 0.029845 |
| ST7_81554_AP      | 1.656989 | 39.72804 | 1.240675 |
| STC1_83086_AP     | 2.816583 | 51.20452 | 2.059306 |
| STK40_1772_RI     | 2.122027 | 44.04214 | 0.327306 |
| STXBP2_47123_AP   | 1.354934 | 38.31124 | 10.18139 |
| SVEP1_87186_AT    | 1.554393 | 48.09523 | 8.863849 |
| TAOK3_24699_AP    | 2.284799 | 52.5523  | 1.566512 |
| TARDBP_635_ES     | 1.423834 | 46.36402 | 1.186516 |

|                   |          |          |          |
|-------------------|----------|----------|----------|
| TBC1D17_51116_ES  | 1.931543 | 73.30188 | 0.495683 |
| TCEA2_60189_RI    | 1.81782  | 36.89414 | 1.014816 |
| TECR_47993_AP     | 2.720282 | 42.05967 | 1.827707 |
| TIMM17B_89018_AA  | 1.215419 | 50.98386 | 0.49096  |
| TIMP2_43923_AD    | 2.030922 | 35.67453 | 0.951188 |
| TM2D1_3230_AT     | 1.398182 | 62.14637 | 3.518649 |
| TMEM126B_18114_RI | 1.665887 | 41.51325 | 2.724765 |
| TMEM138_16188_RI  | 1.423426 | 42.67927 | 8.417306 |
| TMEM14B_75311_AT  | 1.369089 | 39.79094 | 6.018907 |
| TRAP1_33617_AP    | 1.573402 | 39.05323 | 8.734967 |
| TRAPPC3_1752_ES   | 2.026466 | 37.28866 | 0.209641 |
| TRIM4_80863_AT    | 1.236214 | 45.47357 | 1.937357 |
| TTC38_62703_ES    | 1.375332 | 45.21327 | 4.103259 |
| TUBGCP2_13530_AP  | 1.298718 | 39.45535 | 5.528709 |
| TUBGCP2_13535_AA  | 2.737763 | 44.21283 | 5.528709 |
| UBE2G2_60831_ES   | 2.20977  | 61.24254 | 0.161965 |
| UBE2N_23689_RI    | 1.805154 | 37.68085 | 4.145737 |
| UBE3B_24310_ES    | 2.563909 | 35.54806 | 8.08291  |
| UBR4_883_RI       | 3.029953 | 35.72437 | 4.718675 |
| UBXN4_55449_RI    | 2.015936 | 34.78827 | 1.028204 |
| UQCR11_46529_AT   | 2.055202 | 37.94205 | 0.292275 |
| USP40_58045_AP    | 2.53322  | 44.10991 | 1.075956 |
| USP48_994_AP      | 1.188987 | 45.80544 | 3.646375 |
| VAC14_37411_AP    | 1.865808 | 34.73692 | 0.601084 |
| VGLL3_65659_AT    | 2.691891 | 48.1648  | 4.284287 |
| VPS28_85601_RI    | 1.548317 | 43.83286 | 7.491276 |
| VPS28_85602_RI    | 2.33547  | 55.64056 | 7.491276 |
| VPS28_85604_RI    | 2.418835 | 57.95977 | 7.491276 |
| VPS28_85611_RI    | 1.843844 | 46.02359 | 7.491276 |
| VPS8_67976_RI     | 2.180572 | 57.50545 | 0.226443 |
| VRK3_51142_AT     | 1.69176  | 56.67209 | 0.016403 |
| WAC_11103_ES      | 1.880047 | 43.31168 | 0.045828 |
| WBSCR22_80000_AT  | 1.700616 | 46.24492 | 0.341137 |
| XBP1_61561_AP     | 1.428561 | 37.70344 | 3.023477 |
| ZNF20_47777_AT    | 1.164256 | 44.60443 | 8.606455 |
| ZNF24_45164_AA    | 1.394423 | 35.80339 | 5.923833 |
| ZNF317_47268_AA   | 2.019902 | 35.93944 | 3.053495 |
| ZNF638_53926_AP   | 2.032338 | 37.31461 | 0.135991 |
| ZNF675_48823_AT   | 1.635358 | 62.73052 | 1.486068 |
| ZNF76_75899_RI    | 1.910763 | 56.45873 | 3.470216 |
| ZNF76_75900_RI    | 2.351879 | 61.58282 | 3.470216 |
| ZNRF1_37577_AT    | 1.600073 | 43.58074 | 10.18139 |



**Table S4.** ntRNA-miRNA interaction pairs from Targetscan database.

| ntRNA                              | miRNA            |
|------------------------------------|------------------|
| PPIL4_78083_AP(ENST00000340881)    | hsa-miR-499a-5p  |
| PPIL4_78083_AP(ENST00000340881)    | hsa-miR-499a-5p  |
| BSDC1_1591_RI(ENST00000341071)     | hsa-miR-25-3p    |
| GSTM4_4056_RI(ENST00000369833)     | hsa-miR-378a-3p  |
| GSTM4_4056_RI(ENST00000369833)     | hsa-miR-378h     |
| HECTD3_2592_RI(ENST00000372168)    | hsa-miR-26b-5p   |
| KLC2_16990_AP(ENST00000394065)     | hsa-miR-34a-5p   |
| KLC2_16992_RI(ENST00000394065)     | hsa-miR-34a-5p   |
| KLC2_16990_AP(ENST00000394065)     | hsa-miR-143-3p   |
| KLC2_16992_RI(ENST00000394065)     | hsa-miR-143-3p   |
| KLC2_16990_AP(ENST00000394065)     | hsa-miR-148a-3p  |
| KLC2_16990_AP(ENST00000394065)     | hsa-miR-148b-3p  |
| KLC2_16992_RI(ENST00000394065)     | hsa-miR-148a-3p  |
| KLC2_16992_RI(ENST00000394065)     | hsa-miR-148b-3p  |
| KLC2_16990_AP(ENST00000394065)     | hsa-miR-125b-5p  |
| KLC2_16992_RI(ENST00000394065)     | hsa-miR-125b-5p  |
| SNX13_78881_RI(ENST00000409389)    | hsa-miR-25-3p    |
| SLC39A13_15746_RI(ENST00000524928) | hsa-miR-125b-5p  |
| SLC39A13_15747_RI(ENST00000524928) | hsa-miR-125b-5p  |
| SLC39A13_15746_RI(ENST00000524928) | hsa-miR-27b-3p   |
| SLC39A13_15747_RI(ENST00000524928) | hsa-miR-27b-3p   |
| PARP2_26426_RI(ENST00000527915)    | hsa-miR-140-3p.2 |
| TMEM126B_18114_RI(ENST00000534341) | hsa-miR-34a-5p   |
| RBM7_18823_RI(ENST00000541475)     | hsa-miR-186-5p   |
| RBM7_18823_RI(ENST00000541475)     | hsa-miR-125b-5p  |
| RBM7_18823_RI(ENST00000541475)     | hsa-miR-143-3p   |

---

|                                    |                  |
|------------------------------------|------------------|
| CALCOCO1_22108_RI(ENST00000548263) | hsa-miR-374b-5p  |
| UBE2N_23689_RI(ENST00000550657)    | hsa-miR-27b-3p   |
| UBE2N_23689_RI(ENST00000550657)    | hsa-miR-221-3p   |
| UBE2N_23689_RI(ENST00000550657)    | hsa-miR-499a-5p  |
| ABAT_33905_AA(ENST00000569156)     | hsa-miR-125b-5p  |
| ABAT_33905_AA(ENST00000569156)     | hsa-miR-27b-3p   |
| ABAT_33905_AA(ENST00000569156)     | hsa-miR-421      |
| ABAT_33905_AA(ENST00000569156)     | hsa-miR-499a-5p  |
| ABAT_33905_AA(ENST00000569156)     | hsa-miR-374b-5p  |
| PCTP_42588_AA(ENST00000569156)     | hsa-miR-125b-5p  |
| PCTP_42588_AA(ENST00000569156)     | hsa-miR-421      |
| PHF12_40026_RI(ENST00000577226)    | hsa-miR-140-3p.2 |
| PHF12_40025_RI(ENST00000577226)    | hsa-miR-140-3p.2 |
| PHF12_40026_RI(ENST00000577226)    | hsa-miR-221-3p   |
| PHF12_40025_RI(ENST00000577226)    | hsa-miR-221-3p   |
| ZNF24_45164_AA(ENST00000592278)    | hsa-miR-499a-5p  |
| ZNF24_45164_AA(ENST00000592278)    | hsa-miR-140-3p.2 |
| ZNF24_45164_AA(ENST00000592278)    | hsa-miR-199a-5p  |

---

**Table S5.** miRNA-lncRNA interaction pairs from LncBase2 database.

| miRNA           | lncRNA         | miRNA           | lncRNA         | miRNA           | lncRNA        |
|-----------------|----------------|-----------------|----------------|-----------------|---------------|
| hsa-miR-27b-3p  | RP11-368I23.2  | hsa-miR-140-3p  | LINC00645      | hsa-miR-378a-3p | ANKRD10-IT1   |
| hsa-miR-143-3p  | LINC00705      | hsa-miR-199a-5p | LINC00645      | hsa-miR-221-3p  | RP4-568C11.4  |
| hsa-miR-27b-3p  | LINC00705      | hsa-miR-186-5p  | RP11-8P13.5    | hsa-miR-26b-5p  | RP4-568C11.4  |
| hsa-miR-186-5p  | COLCA1         | hsa-miR-26b-5p  | RP11-8P13.5    | hsa-miR-499a-5p | RP4-568C11.4  |
| hsa-miR-378a-3p | COLCA1         | hsa-miR-26b-5p  | CTC-492K19.4   | hsa-miR-148a-3p | RP4-568C11.4  |
| hsa-miR-378h    | CTD-3099C6.5   | hsa-miR-34a-5p  | RP3-522J7.6    | hsa-miR-148b-3p | RP4-568C11.4  |
| hsa-miR-378a-3p | CTD-3099C6.5   | hsa-miR-186-5p  | CTD-2349P21.11 | hsa-miR-378a-3p | RP4-568C11.4  |
| hsa-miR-146b-5p | RP11-63P12.7   | hsa-miR-140-3p  | CTD-2012J19.3  | hsa-miR-199a-5p | CHRM3-AS2     |
| hsa-miR-374b-5p | RP5-940J5.8    | hsa-miR-26b-5p  | CTD-3051D23.1  | hsa-miR-186-5p  | CHRM3-AS2     |
| hsa-miR-143-3p  | AP001610.5     | hsa-miR-143-3p  | CTD-3051D23.1  | hsa-miR-374b-5p | CHRM3-AS2     |
| hsa-miR-186-5p  | CTD-2192J16.21 | hsa-miR-34a-5p  | AC097713.4     | hsa-miR-34a-5p  | RP11-328N19.1 |
| hsa-miR-499a-5p | AC003090.1     | hsa-miR-146b-5p | AC104699.1     | hsa-miR-148b-3p | RP11-118K6.3  |
| hsa-miR-125b-5p | AC003090.1     | hsa-miR-27b-3p  | RP11-286B14.1  | hsa-miR-378h    | RP11-37B2.1   |
| hsa-miR-125b-5p | AC008079.10    | hsa-miR-221-3p  | RP11-286B14.1  | hsa-miR-378a-3p | RP11-37B2.1   |
| hsa-miR-199a-5p | AC008079.10    | hsa-miR-27b-3p  | RP11-383I23.2  | hsa-miR-374b-5p | RP11-37B2.1   |
| hsa-miR-34a-5p  | AC008079.10    | hsa-miR-140-3p  | RP11-706O15.7  | hsa-miR-140-3p  | RP11-37B2.1   |
| hsa-miR-143-3p  | AC008079.10    | hsa-miR-26b-5p  | RP11-706O15.7  | hsa-miR-186-5p  | RP11-37B2.1   |
| hsa-miR-143-3p  | AC093326.1     | hsa-miR-143-3p  | RP11-706O15.7  | hsa-miR-374b-5p | LINC01320     |
| hsa-miR-148a-3p | RP11-539L10.2  | hsa-miR-34a-5p  | MIR99AHG       | hsa-miR-221-3p  | LINC01320     |
| hsa-miR-148b-3p | RP11-539L10.2  | hsa-miR-148a-3p | RP11-146E13.4  | hsa-miR-378h    | RP11-342D11.2 |
| hsa-miR-143-3p  | RP4-794I6.4    | hsa-miR-146b-5p | RP11-554D20.2  | hsa-miR-378a-3p | RP11-342D11.2 |
| hsa-miR-199a-5p | RP4-794I6.4    | hsa-miR-421     | LINC01030      | hsa-miR-34a-5p  | RP11-61I13.3  |
| hsa-miR-34a-5p  | RBMS3-AS1      | hsa-miR-26b-5p  | AC007750.5     | hsa-miR-125b-5p | RP11-61I13.3  |
| hsa-miR-499a-5p | P4HA2-AS1      | hsa-miR-140-3p  | AC007750.5     | hsa-miR-143-3p  | RP11-156L14.1 |
| hsa-miR-27b-3p  | KC6            | hsa-miR-27b-3p  | CTA-228A9.4    | hsa-miR-27b-3p  | RP11-156L14.1 |
| hsa-miR-34a-5p  | RP11-264B14.2  | hsa-miR-148a-3p | CTA-228A9.4    | hsa-miR-148a-3p | RP11-156L14.1 |

|                 |               |                 |                |                 |                |
|-----------------|---------------|-----------------|----------------|-----------------|----------------|
| hsa-miR-25-3p   | LINC01322     | hsa-miR-143-3p  | CTA-228A9.4    | hsa-miR-186-5p  | RP11-156L14.1  |
| hsa-miR-186-5p  | RP4-740C4.7   | hsa-miR-148b-3p | CTA-228A9.4    | hsa-miR-125b-5p | RP11-156L14.1  |
| hsa-miR-34a-5p  | MYCNOS        | hsa-miR-26b-5p  | AC000068.5     | hsa-miR-143-3p  | LINC00882      |
| hsa-miR-186-5p  | RP13-514E23.1 | hsa-miR-26b-5p  | RP11-310E22.5  | hsa-miR-146b-5p | RP11-1151B14.2 |
| hsa-miR-34a-5p  | AC006960.7    | hsa-miR-25-3p   | RP11-900F13.2  | hsa-miR-378a-3p | RP11-1151B14.2 |
| hsa-miR-125b-5p | RP11-700H6.1  | hsa-miR-146b-5p | RP4-539M6.20   | hsa-miR-378h    | RP11-1151B14.2 |
| hsa-miR-34a-5p  | AC016722.4    | hsa-miR-199a-5p | RP11-324I22.2  | hsa-miR-25-3p   | RP11-1B20.1    |
| hsa-miR-148a-3p | AC016722.4    | hsa-miR-125b-5p | RP11-686D22.5  | hsa-miR-148b-3p | RP11-624C23.1  |
| hsa-miR-421     | AC016722.4    | hsa-miR-499a-5p | EXTL3-AS1      | hsa-miR-148a-3p | RP11-624C23.1  |
| hsa-miR-148b-3p | AC016722.4    | hsa-miR-143-3p  | EXTL3-AS1      | hsa-miR-186-5p  | RP11-382J12.1  |
| hsa-miR-148b-3p | RP11-540K16.1 | hsa-miR-186-5p  | RP11-707A18.1  | hsa-miR-374b-5p | RP11-382J12.1  |
| hsa-miR-27b-3p  | RRS1-AS1      | hsa-miR-374b-5p | RP11-707A18.1  | hsa-miR-186-5p  | RP11-133F8.2   |
| hsa-miR-499a-5p | RP4-681N20.5  | hsa-miR-27b-3p  | RP11-707A18.1  | hsa-miR-143-3p  | RP11-133F8.2   |
| hsa-miR-143-3p  | SACS-AS1      | hsa-miR-143-3p  | RP1-102G20.5   | hsa-miR-374b-5p | RP11-196G18.3  |
| hsa-miR-34a-5p  | RP13-126P21.2 | hsa-miR-140-3p  | CTD-2529P6.3   | hsa-miR-143-3p  | ATP11A-AS1     |
| hsa-miR-186-5p  | RP11-117D22.2 | hsa-miR-186-5p  | AC002519.8     | hsa-miR-143-3p  | RP11-356B19.11 |
| hsa-miR-34a-5p  | IQCH-AS1      | hsa-miR-26b-5p  | AC002519.8     | hsa-miR-143-3p  | AC091814.3     |
| hsa-miR-140-3p  | IQCH-AS1      | hsa-miR-421     | AC002519.8     | hsa-miR-186-5p  | AC107079.1     |
| hsa-miR-146b-5p | RP11-319G9.3  | hsa-miR-27b-3p  | RP11-196G18.22 | hsa-miR-146b-5p | RP11-473O4.5   |
| hsa-miR-186-5p  | RP11-319G9.3  | hsa-miR-27b-3p  | RP11-324D17.3  | hsa-miR-25-3p   | RP5-965G21.4   |
| hsa-miR-143-3p  | RP6-159A1.4   | hsa-miR-186-5p  | RP11-399E6.1   | hsa-miR-148b-3p | RP5-965G21.4   |
| hsa-miR-148b-3p | RP6-159A1.4   | hsa-miR-146b-5p | RP11-507K2.2   | hsa-miR-148a-3p | RP5-965G21.4   |
| hsa-miR-148a-3p | RP6-159A1.4   | hsa-miR-125b-5p | NCAM1-AS1      | hsa-miR-143-3p  | RP5-965G21.4   |
| hsa-miR-125b-5p | RP6-159A1.4   | hsa-miR-25-3p   | NCAM1-AS1      | hsa-miR-221-3p  | AC007879.7     |
| hsa-miR-186-5p  | RP6-159A1.4   | hsa-miR-421     | LRP4-AS1       | hsa-miR-199a-5p | AP000265.1     |
| hsa-miR-186-5p  | LINC01208     | hsa-miR-378h    | LRP4-AS1       | hsa-miR-499a-5p | RP11-526A4.1   |
| hsa-miR-27b-3p  | RP11-521D12.5 | hsa-miR-378a-3p | LRP4-AS1       | hsa-miR-146b-5p | ZBED5-AS1      |
| hsa-miR-26b-5p  | FAM95B1       | hsa-miR-34a-5p  | LRP4-AS1       | hsa-miR-125b-5p | RP11-421E14.2  |



|                 |               |                 |                |                 |                |
|-----------------|---------------|-----------------|----------------|-----------------|----------------|
| hsa-miR-143-3p  | FAM95B1       | hsa-miR-499a-5p | RP11-105N14.1  | hsa-miR-221-3p  | RP11-6O2.4     |
| hsa-miR-26b-5p  | AC000036.4    | hsa-miR-34a-5p  | RP11-192P3.4   | hsa-miR-26b-5p  | RP11-330M19.1  |
| hsa-miR-143-3p  | AC000036.4    | hsa-miR-140-3p  | AP000355.2     | hsa-miR-221-3p  | RP11-544A12.8  |
| hsa-miR-27b-3p  | AC058791.1    | hsa-miR-146b-5p | CTD-2015G9.2   | hsa-miR-148b-3p | AC004901.1     |
| hsa-miR-34a-5p  | TOLLIP-AS1    | hsa-miR-186-5p  | RP1-149A16.19  | hsa-miR-148a-3p | AC004901.1     |
| hsa-miR-143-3p  | CTB-193M12.3  | hsa-miR-421     | CTD-2058B24.2  | hsa-miR-199a-5p | RP4-683M8.2    |
| hsa-miR-499a-5p | CTD-2026J24.1 | hsa-miR-374b-5p | RP11-79M19.2   | hsa-miR-186-5p  | RP5-1057J7.7   |
| hsa-miR-34a-5p  | RP11-231I16.1 | hsa-miR-186-5p  | RP11-79M19.2   | hsa-miR-146b-5p | RP5-1056H1.2   |
| hsa-miR-27b-3p  | RP11-231I16.1 | hsa-miR-140-3p  | LINC01561      | hsa-miR-199a-5p | RP5-1056H1.2   |
| hsa-miR-499a-5p | RP11-254F7.3  | hsa-miR-27b-3p  | LINC01561      | hsa-miR-186-5p  | CTC-327F10.4   |
| hsa-miR-125b-5p | TRPM2-AS      | hsa-miR-125b-5p | LINC00987      | hsa-miR-34a-5p  | AF131215.3     |
| hsa-miR-34a-5p  | TRPM2-AS      | hsa-miR-143-3p  | CYP4F35P       | hsa-miR-26b-5p  | AF131215.3     |
| hsa-miR-27b-3p  | L3MBTL4-AS1   | hsa-miR-186-5p  | RP11-575L7.4   | hsa-miR-34a-5p  | AC068282.3     |
| hsa-miR-374b-5p | CTD-2260A17.1 | hsa-miR-34a-5p  | RP11-575L7.4   | hsa-miR-140-3p  | RP11-115D19.1  |
| hsa-miR-27b-3p  | RP11-677I18.3 | hsa-miR-146b-5p | RP5-1042K10.10 | hsa-miR-125b-5p | RP11-115D19.1  |
| hsa-miR-125b-5p | RP11-420A23.1 | hsa-miR-186-5p  | RP3-467L1.6    | hsa-miR-34a-5p  | EAF1-AS1       |
| hsa-miR-378a-3p | LINC00626     | hsa-miR-186-5p  | RP11-342K6.4   | hsa-miR-499a-5p | EAF1-AS1       |
| hsa-miR-378h    | LINC00626     | hsa-miR-34a-5p  | RP11-114M1.1   | hsa-miR-26b-5p  | EAF1-AS1       |
| hsa-miR-27b-3p  | RP11-166P13.3 | hsa-miR-140-3p  | RP11-114M1.1   | hsa-miR-143-3p  | CTD-2199O4.1   |
| hsa-miR-26b-5p  | LINC01020     | hsa-miR-34a-5p  | RP11-206M11.7  | hsa-miR-27b-3p  | RP11-283I3.1   |
| hsa-miR-186-5p  | CTC-484P3.3   | hsa-miR-27b-3p  | CTD-2349P21.5  | hsa-miR-146b-5p | RP11-255H23.4  |
| hsa-miR-143-3p  | CTC-484P3.3   | hsa-miR-148b-3p | RP11-394I13.1  | hsa-miR-186-5p  | CTD-2095E4.5   |
| hsa-miR-421     | CTC-484P3.3   | hsa-miR-148a-3p | RP11-394I13.1  | hsa-miR-374b-5p | MIR503HG       |
| hsa-miR-221-3p  | RP4-564F22.7  | hsa-miR-125b-5p | RP11-59C5.3    | hsa-miR-27b-3p  | CTD-2270F17.1  |
| hsa-miR-125b-5p | MLIP-AS1      | hsa-miR-27b-3p  | IGF2BP2-AS1    | hsa-miR-26b-5p  | RP11-147L13.13 |
| hsa-miR-499a-5p | MLIP-AS1      | hsa-miR-186-5p  | CTD-2521M24.6  | hsa-miR-143-3p  | RP11-276E17.2  |
| hsa-miR-221-3p  | MLIP-AS1      | hsa-miR-378h    | PLA2G4E-AS1    | hsa-miR-148b-3p | AC003991.3     |
| hsa-miR-148b-3p | RP11-3D4.3    | hsa-miR-378a-3p | PLA2G4E-AS1    | hsa-miR-148a-3p | AC003991.3     |

|                 |               |                 |               |                 |               |
|-----------------|---------------|-----------------|---------------|-----------------|---------------|
| hsa-miR-148a-3p | RP11-3D4.3    | hsa-miR-499a-5p | PLA2G4E-AS1   | hsa-miR-27b-3p  | AC007036.6    |
| hsa-miR-186-5p  | IFNG-AS1      | hsa-miR-27b-3p  | CTD-3037G24.3 | hsa-miR-421     | PCAT29        |
| hsa-miR-143-3p  | AC091814.2    | hsa-miR-374b-5p | LINC01393     | hsa-miR-378a-3p | LINC01138     |
| hsa-miR-146b-5p | LINC00607     | hsa-miR-186-5p  | LINC01393     | hsa-miR-378h    | LINC01138     |
| hsa-miR-421     | LINC00487     | hsa-miR-27b-3p  | RP11-760H22.2 | hsa-miR-34a-5p  | LINC01138     |
| hsa-miR-186-5p  | LINC00487     | hsa-miR-421     | NUCB1-AS1     | hsa-miR-199a-5p | LINC01138     |
| hsa-miR-374b-5p | RP11-276H19.1 | hsa-miR-146b-5p | RP11-120K24.3 | hsa-miR-421     | CPEB2-AS1     |
| hsa-miR-27b-3p  | RP11-276H19.1 | hsa-miR-26b-5p  | LINC00837     | hsa-miR-221-3p  | CPEB2-AS1     |
| hsa-miR-186-5p  | RP11-276H19.1 | hsa-miR-125b-5p | LINC00837     | hsa-miR-27b-3p  | CPEB2-AS1     |
| hsa-miR-221-3p  | RP11-234G16.5 | hsa-miR-125b-5p | AC004988.1    | hsa-miR-374b-5p | CPEB2-AS1     |
| hsa-miR-148a-3p | RP4-644L1.2   | hsa-miR-25-3p   | RP11-861L17.3 | hsa-miR-125b-5p | RP11-501J20.5 |
| hsa-miR-148b-3p | RP4-644L1.2   | hsa-miR-499a-5p | RP11-861L17.3 | hsa-miR-148a-3p | RP4-684O24.5  |
| hsa-miR-125b-5p | RP4-644L1.2   | hsa-miR-374b-5p | RP11-471M2.3  | hsa-miR-26b-5p  | RP11-136K14.3 |
| hsa-miR-26b-5p  | RP4-644L1.2   | hsa-miR-499a-5p | RP11-471M2.3  | hsa-miR-374b-5p | LINC00473     |
| hsa-miR-374b-5p | DLEU2L        | hsa-miR-143-3p  | RP5-881L22.5  | hsa-miR-146b-5p | AC007278.2    |
| hsa-miR-27b-3p  | DLEU2L        | hsa-miR-186-5p  | RP11-713C5.1  | hsa-miR-146b-5p | RP11-479J7.2  |
| hsa-miR-125b-5p | RP11-184M15.1 | hsa-miR-374b-5p | RP11-713C5.1  | hsa-miR-125b-5p | RP11-181E10.3 |
| hsa-miR-27b-3p  | RP11-184M15.1 | hsa-miR-140-3p  | RP11-47J17.2  | hsa-miR-26b-5p  | RP11-181E10.3 |
| hsa-miR-125b-5p | RP11-348N5.9  | hsa-miR-499a-5p | RNF219-AS1    | hsa-miR-499a-5p | TNKS2-AS1     |
| hsa-miR-25-3p   | RP11-348N5.9  | hsa-miR-186-5p  | RNF219-AS1    | hsa-miR-34a-5p  | RP11-50D9.3   |
| hsa-miR-186-5p  | RP11-348N5.9  | hsa-miR-27b-3p  | RNF219-AS1    | hsa-miR-499a-5p | RP11-50D9.3   |
| hsa-miR-378a-3p | LINC01556     | hsa-miR-25-3p   | RNF219-AS1    | hsa-miR-374b-5p | RP11-50D9.3   |
| hsa-miR-378h    | LINC01556     | hsa-miR-374b-5p | RNF219-AS1    | hsa-miR-378h    | RP11-346C20.3 |
| hsa-miR-186-5p  | AC009120.11   | hsa-miR-199a-5p | RNF219-AS1    | hsa-miR-378a-3p | RP11-346C20.3 |
| hsa-miR-125b-5p | RP11-401P9.4  | hsa-miR-26b-5p  | RNF219-AS1    | hsa-miR-146b-5p | AP000688.29   |
| hsa-miR-186-5p  | RP11-506O24.2 | hsa-miR-374b-5p | RP13-143G15.4 | hsa-miR-378h    | AP000688.29   |
| hsa-miR-27b-3p  | CTD-2376I20.1 | hsa-miR-148a-3p | CTD-2024I7.18 | hsa-miR-378a-3p | AP000688.29   |
| hsa-miR-27b-3p  | CTC-429L19.3  | hsa-miR-148b-3p | CTD-2024I7.18 | hsa-miR-221-3p  | AP000688.29   |

|                 |               |                 |               |                 |               |
|-----------------|---------------|-----------------|---------------|-----------------|---------------|
| hsa-miR-125b-5p | PRMT5-AS1     | hsa-miR-221-3p  | MIAT          | hsa-miR-140-3p  | AP000688.29   |
| hsa-miR-140-3p  | PRMT5-AS1     | hsa-miR-27b-3p  | MIAT          | hsa-miR-186-5p  | CLRN1-AS1     |
| hsa-miR-221-3p  | PRMT5-AS1     | hsa-miR-125b-5p | MIAT          | hsa-miR-27b-3p  | CLRN1-AS1     |
| hsa-miR-199a-5p | RP11-131L23.1 | hsa-miR-378h    | MIAT          | hsa-miR-378h    | RP11-168O16.1 |
| hsa-miR-186-5p  | RP11-131L23.1 | hsa-miR-378a-3p | MIAT          | hsa-miR-378a-3p | RP11-168O16.1 |
| hsa-miR-140-3p  | RP11-2E11.5   | hsa-miR-143-3p  | RP11-219G17.4 | hsa-miR-186-5p  | RP11-6O2.2    |
| hsa-miR-186-5p  | RP11-2E11.5   | hsa-miR-146b-5p | RP11-831F12.2 | hsa-miR-140-3p  | RP11-6O2.2    |
| hsa-miR-146b-5p | RP11-2E11.5   | hsa-miR-186-5p  | RP11-382A20.6 | hsa-miR-143-3p  | MED4-AS1      |
| hsa-miR-378a-3p | RP11-659P15.1 | hsa-miR-186-5p  | LINC01018     | hsa-miR-34a-5p  | MED4-AS1      |
| hsa-miR-186-5p  | RP11-659P15.1 | hsa-miR-34a-5p  | FENDRR        | hsa-miR-34a-5p  | LINC01272     |
| hsa-miR-378h    | RP11-659P15.1 | hsa-miR-186-5p  | FENDRR        | hsa-miR-143-3p  | LINC01272     |
| hsa-miR-499a-5p | RP11-317G6.1  | hsa-miR-25-3p   | RP11-346C20.4 | hsa-miR-25-3p   | RP11-767I20.1 |
| hsa-miR-143-3p  | PIK3IP1-AS1   | hsa-miR-186-5p  | RP13-631K18.3 | hsa-miR-140-3p  | RP11-767I20.1 |
| hsa-miR-25-3p   | RP11-834C11.6 | hsa-miR-148a-3p | AC005740.6    | hsa-miR-143-3p  | RP11-192H23.7 |
| hsa-miR-26b-5p  | RP11-521O16.2 | hsa-miR-148b-3p | AC005740.6    | hsa-miR-146b-5p | RP11-192H23.7 |
| hsa-miR-27b-3p  | RP11-521O16.2 | hsa-miR-27b-3p  | AC005740.6    | hsa-miR-27b-3p  | LINC01266     |
| hsa-miR-25-3p   | RP11-521O16.2 | hsa-miR-199a-5p | RP11-367G6.3  | hsa-miR-186-5p  | LINC01266     |
| hsa-miR-125b-5p | RP11-597D13.9 | hsa-miR-34a-5p  | RP3-431P23.5  | hsa-miR-148b-3p | LINC01266     |
| hsa-miR-374b-5p | RP11-597D13.9 | hsa-miR-125b-5p | LINC01311     | hsa-miR-27b-3p  | RP11-332J15.4 |
| hsa-miR-146b-5p | LINC01559     | hsa-miR-27b-3p  | LINC01311     | hsa-miR-140-3p  | RP11-332J15.4 |
| hsa-miR-26b-5p  | LINC01559     | hsa-miR-499a-5p | RP11-159D12.2 | hsa-miR-221-3p  | CTD-2510F5.4  |
| hsa-miR-27b-3p  | AC010729.2    | hsa-miR-199a-5p | RP11-159D12.2 | hsa-miR-186-5p  | RP1-142L7.9   |
| hsa-miR-125b-5p | CELF2-AS1     | hsa-miR-143-3p  | LINC00152     | hsa-miR-421     | RP11-10C24.3  |
| hsa-miR-34a-5p  | AC093382.1    | hsa-miR-27b-3p  | RP11-492E3.2  | hsa-miR-186-5p  | RP11-116O18.1 |
| hsa-miR-186-5p  | RP11-268G12.3 | hsa-miR-26b-5p  | RP11-492E3.2  | hsa-miR-146b-5p | RP11-116O18.1 |
| hsa-miR-125b-5p | RP11-268G12.3 | hsa-miR-140-3p  | RP4-646N3.1   | hsa-miR-146b-5p | CTD-2583A14.8 |
| hsa-miR-27b-3p  | TSPEAR-AS2    | hsa-miR-221-3p  | RP4-646N3.1   | hsa-miR-186-5p  | RP11-583F2.2  |
| hsa-miR-148a-3p | TSPEAR-AS2    | hsa-miR-143-3p  | RP11-338I21.1 | hsa-miR-140-3p  | RP11-583F2.2  |

|                 |               |                 |               |                 |               |
|-----------------|---------------|-----------------|---------------|-----------------|---------------|
| hsa-miR-199a-5p | RP1-154K9.2   | hsa-miR-143-3p  | RP11-2L8.1    | hsa-miR-374b-5p | RP11-583F2.2  |
| hsa-miR-26b-5p  | RP1-154K9.2   | hsa-miR-143-3p  | RP1-224A6.9   | hsa-miR-148a-3p | LINC01265     |
| hsa-miR-34a-5p  | RP11-408A13.3 | hsa-miR-186-5p  | RP11-305K5.1  | hsa-miR-499a-5p | LINC00908     |
| hsa-miR-378h    | RP11-443B7.1  | hsa-miR-374b-5p | RP11-902B17.1 | hsa-miR-221-3p  | LINC00908     |
| hsa-miR-378a-3p | RP11-443B7.1  | hsa-miR-34a-5p  | GAS8-AS1      | hsa-miR-146b-5p | RP11-325K4.3  |
| hsa-miR-27b-3p  | RP11-443B7.1  | hsa-miR-125b-5p | RP11-314M24.1 | hsa-miR-499a-5p | SNHG3         |
| hsa-miR-221-3p  | RP11-624D11.2 | hsa-miR-186-5p  | RP11-314M24.1 | hsa-miR-146b-5p | SNHG3         |
| hsa-miR-199a-5p | CTC-367F4.1   | hsa-miR-421     | RP3-508I15.20 | hsa-miR-421     | RP11-286H15.1 |
| hsa-miR-199a-5p | RP11-54O7.18  | hsa-miR-125b-5p | RP11-672A2.1  | hsa-miR-125b-5p | AC018742.1    |
| hsa-miR-25-3p   | AC098617.1    | hsa-miR-148a-3p | CTD-2555A7.3  | hsa-miR-143-3p  | RP11-1084E5.1 |
| hsa-miR-125b-5p | AC098617.1    | hsa-miR-148b-3p | CTD-2555A7.3  | hsa-miR-421     | RP11-400N13.3 |
| hsa-miR-26b-5p  | RP13-494C23.1 | hsa-miR-26b-5p  | RP11-391H12.8 | hsa-miR-140-3p  | RP11-389G6.3  |
| hsa-miR-378a-3p | RP4-625H18.2  | hsa-miR-125b-5p | RP11-95O2.1   | hsa-miR-148a-3p | RP1-102E24.8  |
| hsa-miR-378h    | RP4-625H18.2  | hsa-miR-499a-5p | RP11-861E21.2 | hsa-miR-34a-5p  | ETV5-AS1      |
| hsa-miR-27b-3p  | CASC11        | hsa-miR-27b-3p  | RP11-861E21.2 | hsa-miR-34a-5p  | RP11-443B7.3  |
| hsa-miR-143-3p  | CASC11        | hsa-miR-186-5p  | MGC15885      | hsa-miR-186-5p  | RP11-443B7.3  |
| hsa-miR-125b-5p | KCNQ1OT1      | hsa-miR-34a-5p  | MGC15885      | hsa-miR-421     | KB-68A7.1     |
| hsa-miR-27b-3p  | KCNQ1OT1      | hsa-miR-143-3p  | RP11-820I16.1 | hsa-miR-143-3p  | RP11-348J24.2 |
| hsa-miR-143-3p  | KCNQ1OT1      | hsa-miR-125b-5p | FTO-IT1       | hsa-miR-378a-3p | HS1BP3-IT1    |
| hsa-miR-34a-5p  | KCNQ1OT1      | hsa-miR-125b-5p | HOXB-AS3      | hsa-miR-378h    | HS1BP3-IT1    |
| hsa-miR-26b-5p  | KCNQ1OT1      | hsa-miR-378a-3p | HOXB-AS3      | hsa-miR-148b-3p | CTD-2171N6.1  |
| hsa-miR-374b-5p | KCNQ1OT1      | hsa-miR-378h    | HOXB-AS3      | hsa-miR-148a-3p | CTD-2171N6.1  |
| hsa-miR-140-3p  | KCNQ1OT1      | hsa-miR-186-5p  | RP11-19E18.2  | hsa-miR-186-5p  | RP11-290F5.1  |
| hsa-miR-199a-5p | KCNQ1OT1      | hsa-miR-27b-3p  | FAM215B       | hsa-miR-143-3p  | RP11-290F5.1  |
| hsa-miR-146b-5p | KCNQ1OT1      | hsa-miR-27b-3p  | RP11-673E1.1  | hsa-miR-199a-5p | RP11-423G4.10 |
| hsa-miR-378h    | KCNQ1OT1      | hsa-miR-421     | RP11-673E1.1  | hsa-miR-221-3p  | RP11-423G4.10 |
| hsa-miR-148a-3p | KCNQ1OT1      | hsa-miR-26b-5p  | RP11-673E1.1  | hsa-miR-378h    | RP11-314O13.1 |
| hsa-miR-378a-3p | KCNQ1OT1      | hsa-miR-140-3p  | RP11-673E1.1  | hsa-miR-378a-3p | RP11-314O13.1 |

|                 |           |                 |                        |                 |               |
|-----------------|-----------|-----------------|------------------------|-----------------|---------------|
| hsa-miR-421     | KCNQ1OT1  | hsa-miR-378a-3p | RP11-673E1.1           | hsa-miR-125b-5p | RP11-314O13.1 |
| hsa-miR-148b-3p | KCNQ1OT1  | hsa-miR-125b-5p | RP11-673E1.1           | hsa-miR-125b-5p | RP11-455F5.6  |
| hsa-miR-25-3p   | KCNQ1OT1  | hsa-miR-374b-5p | RP11-673E1.1           | hsa-miR-421     | RP11-455F5.6  |
|                 |           |                 | chr22-                 |                 |               |
| hsa-miR-499a-5p | KCNQ1OT1  | hsa-miR-186-5p  | 38_28785274-29006793.1 | hsa-miR-140-3p  | RP3-340N1.2   |
|                 |           |                 | chr22-                 |                 |               |
| hsa-miR-186-5p  | KCNQ1OT1  | hsa-miR-143-3p  | 38_28785274-29006793.1 | hsa-miR-34a-5p  | RP3-340N1.2   |
|                 |           |                 | chr22-                 |                 |               |
| hsa-miR-221-3p  | KCNQ1OT1  | hsa-miR-146b-5p | 38_28785274-29006793.1 | hsa-miR-143-3p  | RP3-340N1.2   |
|                 |           |                 | chr22-                 |                 |               |
| hsa-miR-499a-5p | LINC00426 | hsa-miR-27b-3p  | 38_28785274-29006793.1 | hsa-miR-186-5p  | AC007326.10   |
|                 |           |                 | chr22-                 |                 |               |
| hsa-miR-199a-5p | LINC00426 | hsa-miR-140-3p  | 38_28785274-29006793.1 | hsa-miR-148a-3p | AC007326.10   |
|                 |           |                 | chr22-                 |                 |               |
| hsa-miR-27b-3p  | LINC00426 | hsa-miR-125b-5p | 38_28785274-29006793.1 | hsa-miR-148b-3p | AC007326.10   |
|                 |           |                 | chr22-                 |                 |               |
| hsa-miR-143-3p  | CASC2     | hsa-miR-26b-5p  | 38_28785274-29006793.1 | hsa-miR-27b-3p  | AC007326.10   |
|                 |           |                 | chr22-                 |                 |               |
| hsa-miR-499a-5p | CASC2     | hsa-miR-374b-5p | 38_28785274-29006793.1 | hsa-miR-27b-3p  | RP11-473O4.4  |
|                 |           |                 |                        |                 |               |

|                 |               |                 |                        |                 |               |
|-----------------|---------------|-----------------|------------------------|-----------------|---------------|
| chr22-          |               |                 |                        |                 |               |
| hsa-miR-186-5p  | CASC2         | hsa-miR-34a-5p  | 38_28785274-29006793.1 | hsa-miR-125b-5p | RP11-473O4.4  |
| chr22-          |               |                 |                        |                 |               |
| hsa-miR-125b-5p | CASC2         | hsa-miR-499a-5p | 38_28785274-29006793.1 | hsa-miR-125b-5p | RP11-284F21.9 |
| chr22-          |               |                 |                        |                 |               |
| hsa-miR-199a-5p | AC007161.5    | hsa-miR-148a-3p | 38_28785274-29006793.1 | hsa-miR-378h    | RP11-807H22.7 |
| chr22-          |               |                 |                        |                 |               |
| hsa-miR-186-5p  | RP1-5O6.6     | hsa-miR-378h    | 38_28785274-29006793.1 | hsa-miR-378a-3p | RP11-807H22.7 |
| chr22-          |               |                 |                        |                 |               |
| hsa-miR-148a-3p | RP11-256L6.2  | hsa-miR-148b-3p | 38_28785274-29006793.1 | hsa-miR-421     | LINC00664     |
| chr22-          |               |                 |                        |                 |               |
| hsa-miR-374b-5p | RP11-438L19.1 | hsa-miR-378a-3p | 38_28785274-29006793.1 | hsa-miR-199a-5p | LINC00664     |
| chr22-          |               |                 |                        |                 |               |
| hsa-miR-146b-5p | RP11-254I22.1 | hsa-miR-199a-5p | 38_28785274-29006793.1 | hsa-miR-125b-5p | LINC00664     |
| chr22-          |               |                 |                        |                 |               |
| hsa-miR-186-5p  | RP11-272L14.2 | hsa-miR-421     | 38_28785274-29006793.1 | hsa-miR-27b-3p  | LINC00664     |
| chr22-          |               |                 |                        |                 |               |
| hsa-miR-27b-3p  | AC012506.4    | hsa-miR-25-3p   | 38_28785274-29006793.1 | hsa-miR-26b-5p  | RP11-427L15.2 |

| chr22-          |                |                 |                        |                 |                 |
|-----------------|----------------|-----------------|------------------------|-----------------|-----------------|
| hsa-miR-186-5p  | RP11-45M22.5   | hsa-miR-221-3p  | 38_28785274-29006793.1 | hsa-miR-125b-5p | RP11-111I12.1   |
| hsa-miR-27b-3p  | RP11-462L8.1   | hsa-miR-148b-3p | RP11-231N3.1           | hsa-miR-499a-5p | AC097467.2      |
| hsa-miR-499a-5p | RP11-462L8.1   | hsa-miR-148a-3p | RP11-231N3.1           | hsa-miR-27b-3p  | AC097467.2      |
| hsa-miR-143-3p  | DGCR9          | hsa-miR-374b-5p | LINC01362              | hsa-miR-378h    | AC097467.2      |
| hsa-miR-199a-5p | ROR1-AS1       | hsa-miR-143-3p  | RP11-536K7.3           | hsa-miR-378a-3p | AC097467.2      |
| hsa-miR-186-5p  | LINC00472      | hsa-miR-143-3p  | LINC00216              | hsa-miR-27b-3p  | RP11-27G22.1    |
| hsa-miR-374b-5p | RP11-403A21.1  | hsa-miR-499a-5p | LINC00216              | hsa-miR-26b-5p  | RP11-439C15.4   |
| hsa-miR-199a-5p | RP11-267N12.1  | hsa-miR-421     | RP11-314C16.1          | hsa-miR-499a-5p | XXyac-YX155B6.5 |
| hsa-miR-186-5p  | GDNF-AS1       | hsa-miR-221-3p  | RP11-326A19.3          | hsa-miR-146b-5p | XXyac-YX155B6.5 |
| hsa-miR-421     | AC007126.1     | hsa-miR-146b-5p | AC073115.7             | hsa-miR-186-5p  | RP11-64D24.4    |
| hsa-miR-27b-3p  | RP11-875O11.3  | hsa-miR-186-5p  | RP11-89N17.4           | hsa-miR-125b-5p | RP11-64D24.4    |
| hsa-miR-125b-5p | RP11-875O11.3  | hsa-miR-27b-3p  | XXbac-BPG248L24.13     | hsa-miR-148b-3p | RP11-64D24.4    |
| hsa-miR-499a-5p | RP11-497G19.7  | hsa-miR-34a-5p  | RP11-394J1.2           | hsa-miR-148a-3p | RP11-64D24.4    |
| hsa-miR-378h    | LINC01436      | hsa-miR-143-3p  | RP11-394I13.2          | hsa-miR-378h    | ACTA2-AS1       |
| hsa-miR-146b-5p | RP11-238K6.1   | hsa-miR-374b-5p | RP11-505E24.3          | hsa-miR-378a-3p | ACTA2-AS1       |
| hsa-miR-186-5p  | RP11-238K6.1   | hsa-miR-143-3p  | RP5-839B4.8            | hsa-miR-143-3p  | ACTA2-AS1       |
| hsa-miR-146b-5p | CTC-338M12.6   | hsa-miR-146b-5p | RP5-839B4.8            | hsa-miR-27b-3p  | LINC01355       |
| hsa-miR-199a-5p | AC006262.4     | hsa-miR-34a-5p  | CTD-2527I21.15         | hsa-miR-186-5p  | LINC01355       |
| hsa-miR-499a-5p | RP11-468H14.2  | hsa-miR-148b-3p | PTCSC3                 | hsa-miR-186-5p  | AC012593.1      |
| hsa-miR-34a-5p  | RP11-642D21.1  | hsa-miR-148a-3p | PTCSC3                 | hsa-miR-146b-5p | AC012593.1      |
| hsa-miR-146b-5p | SC22CB-109E1.1 | hsa-miR-499a-5p | RP5-991G20.6           | hsa-miR-27b-3p  | RP11-316M20.1   |
| hsa-miR-26b-5p  | SC22CB-109E1.1 | hsa-miR-27b-3p  | RP11-181B11.1          | hsa-miR-34a-5p  | LINC00906       |
| hsa-miR-143-3p  | SC22CB-109E1.1 | hsa-miR-143-3p  | CTC-498M16.2           | hsa-miR-27b-3p  | RP11-1008C21.1  |

|                 |                      |                 |                |                 |                |
|-----------------|----------------------|-----------------|----------------|-----------------|----------------|
| hsa-miR-421     | SC22CB-109E1.1       | hsa-miR-186-5p  | LINC01315      | hsa-miR-26b-5p  | RP11-1008C21.1 |
| hsa-miR-125b-5p | RP1-60O19.1          | hsa-miR-143-3p  | INHBA-AS1      | hsa-miR-140-3p  | RP11-1008C21.1 |
| hsa-miR-146b-5p | RP1-60O19.1          | hsa-miR-374b-5p | INHBA-AS1      | hsa-miR-146b-5p | RP11-285E9.5   |
| hsa-miR-34a-5p  | RP11-451B8.1         | hsa-miR-374b-5p | RP5-998N21.4   | hsa-miR-25-3p   | LINC00533      |
| hsa-miR-374b-5p | RP11-210K20.5        | hsa-miR-34a-5p  | RP5-998N21.4   | hsa-miR-186-5p  | LINC00304      |
| hsa-miR-146b-5p | RP11-210K20.5        | hsa-miR-148a-3p | RP11-381O6.1   | hsa-miR-148b-3p | AP001092.4     |
| hsa-miR-186-5p  | XXbac-<br>B476C20.13 | hsa-miR-27b-3p  | RP11-44F14.8   | hsa-miR-148a-3p | AP001092.4     |
| hsa-miR-34a-5p  | XXbac-<br>B476C20.13 | hsa-miR-186-5p  | RP11-44F14.8   | hsa-miR-143-3p  | AC007038.7     |
| hsa-miR-146b-5p | RP11-121A8.1         | hsa-miR-143-3p  | RP11-44F14.8   | hsa-miR-34a-5p  | LINC01359      |
| hsa-miR-140-3p  | RP11-121A8.1         | hsa-miR-146b-5p | RP11-44F14.8   | hsa-miR-221-3p  | LINC01359      |
| hsa-miR-221-3p  | RP11-867G23.3        | hsa-miR-499a-5p | RP11-44F14.8   | hsa-miR-27b-3p  | RP1-287H17.1   |
| hsa-miR-27b-3p  | RP11-761I4.1         | hsa-miR-374b-5p | RP11-44F14.8   | hsa-miR-143-3p  | LINC00865      |
| hsa-miR-34a-5p  | RP11-761I4.1         | hsa-miR-125b-5p | RP11-44F14.8   | hsa-miR-146b-5p | LINC00865      |
| hsa-miR-26b-5p  | RP11-761I4.1         | hsa-miR-186-5p  | LLNLR-246C6.1  | hsa-miR-25-3p   | CTD-2562J15.6  |
| hsa-miR-34a-5p  | RP11-102N12.3        | hsa-miR-27b-3p  | LLNLR-246C6.1  | hsa-miR-143-3p  | CTC-265F19.1   |
| hsa-miR-140-3p  | RP11-336K24.12       | hsa-miR-421     | LLNLR-246C6.1  | hsa-miR-499a-5p | LINC01235      |
| hsa-miR-125b-5p | RP11-138P22.1        | hsa-miR-140-3p  | AP004372.1     | hsa-miR-221-3p  | LINC01235      |
| hsa-miR-221-3p  | RP11-567J20.3        | hsa-miR-374b-5p | RP11-231E19.1  | hsa-miR-27b-3p  | RP11-588H23.3  |
| hsa-miR-199a-5p | CTD-3216D2.5         | hsa-miR-140-3p  | RP11-231E19.1  | hsa-miR-27b-3p  | CTD-2538C1.3   |
| hsa-miR-146b-5p | CTD-3216D2.5         | hsa-miR-25-3p   | LINC01021      | hsa-miR-186-5p  | AC010095.5     |
| hsa-miR-186-5p  | RP11-9E17.1          | hsa-miR-186-5p  | LINC01021      | hsa-miR-143-3p  | AC024084.1     |
| hsa-miR-374b-5p | RP11-346C4.3         | hsa-miR-25-3p   | RP11-92B11.3   | hsa-miR-143-3p  | AL133493.2     |
| hsa-miR-374b-5p | RP11-629G13.1        | hsa-miR-27b-3p  | RP11-92B11.3   | hsa-miR-34a-5p  | RP11-65L3.2    |
| hsa-miR-125b-5p | RP11-352D13.5        | hsa-miR-125b-5p | RP4-669P10.16  | hsa-miR-186-5p  | RP11-65L3.2    |
| hsa-miR-27b-3p  | RP11-91J3.3          | hsa-miR-378a-3p | RP11-680F20.10 | hsa-miR-199a-5p | RP11-65L3.2    |
| hsa-miR-143-3p  | CTD-2571L23.8        | hsa-miR-378h    | RP11-680F20.10 | hsa-miR-125b-5p | LINC01426      |



|                 |               |                 |                |                 |               |
|-----------------|---------------|-----------------|----------------|-----------------|---------------|
| hsa-miR-25-3p   | CTD-2571L23.8 | hsa-miR-146b-5p | RP11-680F20.10 | hsa-miR-143-3p  | LINC01426     |
| hsa-miR-146b-5p | RP4-655J12.4  | hsa-miR-140-3p  | RP11-680F20.10 | hsa-miR-186-5p  | MIR155HG      |
| hsa-miR-27b-3p  | RP11-81H14.2  | hsa-miR-374b-5p | RP11-680F20.10 | hsa-miR-140-3p  | MIR155HG      |
| hsa-miR-27b-3p  | AP000221.1    | hsa-miR-421     | AC002044.4     | hsa-miR-499a-5p | RP11-359E10.1 |
| hsa-miR-378a-3p | AC007461.2    | hsa-miR-27b-3p  | AC017002.2     | hsa-miR-143-3p  | SIRPG-AS1     |
| hsa-miR-378h    | AC007461.2    | hsa-miR-421     | RP11-385N23.1  | hsa-miR-143-3p  | CTB-171A8.1   |
| hsa-miR-143-3p  | AC007461.2    | hsa-miR-199a-5p | AC097495.3     | hsa-miR-143-3p  | AC108676.1    |
| hsa-miR-34a-5p  | AC007461.2    | hsa-miR-25-3p   | AC097495.3     | hsa-miR-143-3p  | Z83844.1      |
| hsa-miR-27b-3p  | RP11-710F7.3  | hsa-miR-186-5p  | RP3-333A15.1   | hsa-miR-140-3p  | RP11-528A4.2  |
| hsa-miR-421     | RP11-283C24.1 | hsa-miR-499a-5p | RP3-333A15.1   | hsa-miR-143-3p  | CDKN2B-AS1    |
| hsa-miR-148a-3p | RP11-540A21.2 | hsa-miR-499a-5p | AC069363.1     | hsa-miR-140-3p  | CDKN2B-AS1    |
| hsa-miR-148b-3p | RP11-540A21.2 | hsa-miR-27b-3p  | AC069363.1     | hsa-miR-148a-3p | CDKN2B-AS1    |
| hsa-miR-186-5p  | RP11-540A21.2 | hsa-miR-146b-5p | AC069363.1     | hsa-miR-148b-3p | CDKN2B-AS1    |
| hsa-miR-34a-5p  | C1QTNF1-AS1   | hsa-miR-146b-5p | PCAT18         | hsa-miR-125b-5p | AP000472.2    |
| hsa-miR-186-5p  | CLYBL-AS2     | hsa-miR-34a-5p  | RP11-17G12.2   | hsa-miR-143-3p  | AP000472.2    |
| hsa-miR-26b-5p  | RP11-679B19.1 | hsa-miR-146b-5p | RP11-417B4.2   | hsa-miR-27b-3p  | AP000344.3    |
| hsa-miR-146b-5p | RP1-155D22.2  | hsa-miR-34a-5p  | RP11-417B4.2   | hsa-miR-186-5p  | PVT1          |
| hsa-miR-125b-5p | CTD-2353F22.1 | hsa-miR-143-3p  | RP11-417B4.2   | hsa-miR-140-3p  | PVT1          |
| hsa-miR-148b-3p | SNHG24        | hsa-miR-140-3p  | RP1-197B17.5   | hsa-miR-374b-5p | PVT1          |
| hsa-miR-148b-3p | RBMS3-AS2     | hsa-miR-186-5p  | CTB-114C7.4    | hsa-miR-148b-3p | PVT1          |
| hsa-miR-27b-3p  | LINC00880     | hsa-miR-374b-5p | CTB-114C7.4    | hsa-miR-186-5p  | AF011889.2    |
| hsa-miR-499a-5p | RP11-362F19.3 | hsa-miR-143-3p  | RP5-1014D13.2  | hsa-miR-378a-3p | RP4-647J21.1  |
| hsa-miR-143-3p  | RP11-212I21.2 | hsa-miR-25-3p   | RP5-1014D13.2  | hsa-miR-378h    | RP4-647J21.1  |
| hsa-miR-27b-3p  | RP11-212I21.2 | hsa-miR-26b-5p  | RP5-1014D13.2  | hsa-miR-26b-5p  | LINC00174     |
| hsa-miR-186-5p  | LINC00589     | hsa-miR-186-5p  | RP5-1014D13.2  | hsa-miR-378h    | LINC00174     |
| hsa-miR-143-3p  | LINC00589     | hsa-miR-199a-5p | RP5-1014D13.2  | hsa-miR-378a-3p | LINC00174     |
| hsa-miR-27b-3p  | RP11-383H13.1 | hsa-miR-27b-3p  | RP11-96O20.5   | hsa-miR-421     | LINC00174     |
| hsa-miR-186-5p  | RP11-383H13.1 | hsa-miR-27b-3p  | OSTM1-AS1      | hsa-miR-143-3p  | LINC00174     |

|                 |               |                 |                |                 |                |
|-----------------|---------------|-----------------|----------------|-----------------|----------------|
| hsa-miR-34a-5p  | RP11-383H13.1 | hsa-miR-125b-5p | RP11-661A12.9  | hsa-miR-148b-3p | LINC00174      |
| hsa-miR-374b-5p | RP1-102K2.8   | hsa-miR-34a-5p  | RP11-1069G10.1 | hsa-miR-25-3p   | LINC00174      |
| hsa-miR-186-5p  | RP11-13K12.2  | hsa-miR-143-3p  | RP11-1069G10.1 | hsa-miR-148a-3p | RP11-489G11.3  |
| hsa-miR-374b-5p | RP11-81H14.1  | hsa-miR-378h    | RP11-434H6.6   | hsa-miR-148b-3p | RP11-489G11.3  |
| hsa-miR-143-3p  | RP5-1120P11.3 | hsa-miR-140-3p  | RP11-434H6.6   | hsa-miR-125b-5p | RP11-431J24.2  |
| hsa-miR-125b-5p | RP4-671O14.7  | hsa-miR-378a-3p | RP11-434H6.6   | hsa-miR-421     | RP11-431J24.2  |
| hsa-miR-27b-3p  | RP4-671O14.7  | hsa-miR-143-3p  | RP3-412A9.17   | hsa-miR-186-5p  | RP1-102K2.6    |
| hsa-miR-421     | RP4-671O14.7  | hsa-miR-199a-5p | RP3-412A9.17   | hsa-miR-27b-3p  | RP11-508N22.13 |
| hsa-miR-143-3p  | RP4-671O14.7  | hsa-miR-26b-5p  | RP3-412A9.17   | hsa-miR-143-3p  | CYP51A1-AS1    |
| hsa-miR-148b-3p | RP4-671O14.7  | hsa-miR-27b-3p  | RP3-412A9.17   | hsa-miR-146b-5p | MIR222HG       |
| hsa-miR-221-3p  | RP4-671O14.7  | hsa-miR-148b-3p | RP3-412A9.17   | hsa-miR-125b-5p | RP1-79C4.4     |
| hsa-miR-148a-3p | RP4-671O14.7  | hsa-miR-148a-3p | RP3-412A9.17   | hsa-miR-27b-3p  | RP1-79C4.4     |
| hsa-miR-186-5p  | RP4-671O14.7  | hsa-miR-186-5p  | RP3-412A9.17   | hsa-miR-421     | IBA57-AS1      |
| hsa-miR-26b-5p  | RP4-671O14.7  | hsa-miR-25-3p   | RP3-412A9.17   | hsa-miR-199a-5p | RP4-580N22.2   |
| hsa-miR-374b-5p | RP4-671O14.7  | hsa-miR-378h    | RP3-412A9.17   | hsa-miR-186-5p  | RP11-359E8.5   |
| hsa-miR-421     | RP1-29C18.8   | hsa-miR-378a-3p | RP3-412A9.17   | hsa-miR-25-3p   | RP11-359E8.5   |
| hsa-miR-421     | RP11-452H21.4 | hsa-miR-499a-5p | RP3-412A9.17   | hsa-miR-186-5p  | LINC01440      |
| hsa-miR-143-3p  | RP11-452H21.4 | hsa-miR-374b-5p | AC002117.1     | hsa-miR-26b-5p  | RP4-781K5.6    |
| hsa-miR-34a-5p  | RP11-331F9.3  | hsa-miR-125b-5p | RP11-517C16.2  | hsa-miR-34a-5p  | RP11-982M15.6  |
| hsa-miR-34a-5p  | RP11-511B23.2 | hsa-miR-125b-5p | MIRLET7BHG     | hsa-miR-140-3p  | RP11-426C22.5  |
| hsa-miR-27b-3p  | FGF14-IT1     | hsa-miR-146b-5p | RP11-982M15.7  | hsa-miR-374b-5p | RP11-30P6.6    |
| hsa-miR-125b-5p | RP11-261P9.4  | hsa-miR-143-3p  | C20orf203      | hsa-miR-146b-5p | RP11-30P6.6    |
| hsa-miR-499a-5p | PRICKLE2-AS1  | hsa-miR-146b-5p | RAP2C-AS1      | hsa-miR-140-3p  | RP11-30P6.6    |
| hsa-miR-140-3p  | PRICKLE2-AS1  | hsa-miR-186-5p  | RAP2C-AS1      | hsa-miR-146b-5p | RP11-20B24.5   |
| hsa-miR-27b-3p  | RP3-368B9.2   | hsa-miR-125b-5p | RP11-91P24.6   | hsa-miR-146b-5p | RP11-149I23.3  |
| hsa-miR-34a-5p  | RP3-368B9.2   | hsa-miR-27b-3p  | RP11-158H5.8   | hsa-miR-148b-3p | HOXA11-AS      |
| hsa-miR-378a-3p | AC116366.6    | hsa-miR-26b-5p  | RP5-1112D6.7   | hsa-miR-146b-5p | HOXA11-AS      |
| hsa-miR-378h    | AC116366.6    | hsa-miR-34a-5p  | GS1-600G8.5    | hsa-miR-148a-3p | HOXA11-AS      |

|                 |                        |                 |               |                 |               |
|-----------------|------------------------|-----------------|---------------|-----------------|---------------|
| hsa-miR-25-3p   | AC116366.6             | hsa-miR-125b-5p | RP11-380J14.1 | hsa-miR-27b-3p  | AP000233.4    |
| hsa-miR-125b-5p | RP11-371F15.3          | hsa-miR-199a-5p | RP11-468E2.5  | hsa-miR-26b-5p  | RP11-547D24.1 |
| hsa-miR-26b-5p  | RP4-761J14.8           | hsa-miR-34a-5p  | RP3-322G13.7  | hsa-miR-27b-3p  | FAM225B       |
| hsa-miR-378h    | RP4-761J14.8           | hsa-miR-140-3p  | RP3-323N1.2   | hsa-miR-34a-5p  | RP4-782L23.2  |
| hsa-miR-378a-3p | RP4-761J14.8           | hsa-miR-143-3p  | RP11-63A11.1  | hsa-miR-125b-5p | RP4-782L23.2  |
| hsa-miR-199a-5p | RP4-761J14.8           | hsa-miR-374b-5p | RP11-584P21.2 | hsa-miR-374b-5p | RP11-999E24.3 |
| hsa-miR-146b-5p | AC006272.2             | hsa-miR-25-3p   | RP11-584P21.2 | hsa-miR-26b-5p  | CTD-2537I9.13 |
| hsa-miR-125b-5p | AC006272.2             | hsa-miR-143-3p  | CTD-3020H12.4 | hsa-miR-27b-3p  | AF064858.8    |
| hsa-miR-186-5p  | AC006272.2             | hsa-miR-186-5p  | RP11-13J8.1   | hsa-miR-27b-3p  | RP11-66N24.6  |
| hsa-miR-34a-5p  | RP11-727F15.9          | hsa-miR-27b-3p  | FAM225A       | hsa-miR-374b-5p | RP11-571I18.5 |
| hsa-miR-140-3p  | XXbac-<br>BPG157A10.21 | hsa-miR-199a-5p | RP1-27K12.2   | hsa-miR-27b-3p  | RP11-571I18.5 |
| hsa-miR-186-5p  | WT1-AS                 | hsa-miR-378h    | RP11-467L24.1 | hsa-miR-146b-5p | RP11-575F12.1 |
| hsa-miR-34a-5p  | WT1-AS                 | hsa-miR-378a-3p | RP11-467L24.1 | hsa-miR-146b-5p | RP11-92C4.3   |
| hsa-miR-374b-5p | WT1-AS                 | hsa-miR-143-3p  | RP11-467L24.1 | hsa-miR-421     | RP11-322E11.5 |
| hsa-miR-186-5p  | CTD-2587M2.1           | hsa-miR-27b-3p  | CTD-2562J15.4 | hsa-miR-27b-3p  | RP11-322E11.5 |
| hsa-miR-148b-3p | AC007362.3             | hsa-miR-34a-5p  | AC017101.10   | hsa-miR-140-3p  | ERVH48-1      |
| hsa-miR-186-5p  | RP11-680G24.6          | hsa-miR-125b-5p | CTA-221G9.7   | hsa-miR-499a-5p | ERVH48-1      |
| hsa-miR-143-3p  | CTB-181H17.1           | hsa-miR-374b-5p | LINC00240     | hsa-miR-27b-3p  | ERVH48-1      |
| hsa-miR-125b-5p | LINC00565              | hsa-miR-146b-5p | LINC00240     | hsa-miR-374b-5p | ERVH48-1      |
| hsa-miR-26b-5p  | LINC00565              | hsa-miR-499a-5p | LINC00240     | hsa-miR-34a-5p  | ERVH48-1      |
| hsa-miR-143-3p  | GABPB1-AS1             | hsa-miR-125b-5p | RP11-481J2.2  | hsa-miR-421     | ERVH48-1      |
| hsa-miR-186-5p  | GABPB1-AS1             | hsa-miR-378h    | RP11-481J2.2  | hsa-miR-186-5p  | ERVH48-1      |
| hsa-miR-499a-5p | GABPB1-AS1             | hsa-miR-378a-3p | RP11-481J2.2  | hsa-miR-125b-5p | AP001046.6    |
| hsa-miR-374b-5p | GABPB1-AS1             | hsa-miR-125b-5p | AATBC         | hsa-miR-34a-5p  | RP11-3P17.5   |
| hsa-miR-421     | GABPB1-AS1             | hsa-miR-27b-3p  | AATBC         | hsa-miR-26b-5p  | CTB-107G13.1  |
| hsa-miR-26b-5p  | GABPB1-AS1             | hsa-miR-186-5p  | RP11-1M18.1   | hsa-miR-378a-3p | CTD-2530N21.5 |
| hsa-miR-199a-5p | RP11-61F12.1           | hsa-miR-186-5p  | TTLL7-IT1     | hsa-miR-378h    | CTD-2530N21.5 |

|                 |               |                 |               |                 |                |
|-----------------|---------------|-----------------|---------------|-----------------|----------------|
| hsa-miR-499a-5p | LINC00535     | hsa-miR-125b-5p | RP4-798A10.4  | hsa-miR-148b-3p | AP000282.3     |
| hsa-miR-199a-5p | LINC00535     | hsa-miR-27b-3p  | CTB-178M22.1  | hsa-miR-148a-3p | AP000282.3     |
| hsa-miR-143-3p  | RP11-525A16.4 | hsa-miR-186-5p  | RP11-526I2.5  | hsa-miR-499a-5p | RP5-921G16.2   |
| hsa-miR-27b-3p  | RP11-293M10.6 | hsa-miR-27b-3p  | RP11-526I2.5  | hsa-miR-143-3p  | CH17-264L24.1  |
| hsa-miR-140-3p  | LINC01234     | hsa-miR-421     | RP11-526I2.5  | hsa-miR-199a-5p | CH17-264L24.1  |
| hsa-miR-27b-3p  | LINC01543     | hsa-miR-199a-5p | RP11-526I2.5  | hsa-miR-125b-5p | CH17-264L24.1  |
| hsa-miR-146b-5p | BTBD9-AS1     | hsa-miR-146b-5p | AC009303.1    | hsa-miR-374b-5p | CH17-264L24.1  |
| hsa-miR-199a-5p | BTBD9-AS1     | hsa-miR-186-5p  | ARAP1-AS2     | hsa-miR-27b-3p  | RP11-753H16.5  |
| hsa-miR-27b-3p  | LINC00608     | hsa-miR-146b-5p | RP11-265N7.1  | hsa-miR-125b-5p | FLJ45079       |
| hsa-miR-421     | RP3-492J12.2  | hsa-miR-186-5p  | RP11-265N7.1  | hsa-miR-199a-5p | FLJ45079       |
| hsa-miR-25-3p   | LINC00365     | hsa-miR-148a-3p | RP11-265N7.1  | hsa-miR-186-5p  | RP11-154H23.3  |
| hsa-miR-34a-5p  | LINC00365     | hsa-miR-143-3p  | RP11-436K8.1  | hsa-miR-34a-5p  | RP11-154H23.3  |
| hsa-miR-186-5p  | RP1-140K8.5   | hsa-miR-34a-5p  | RP11-436K8.1  | hsa-miR-34a-5p  | RP11-669E14.6  |
| hsa-miR-186-5p  | RP11-723O4.9  | hsa-miR-27b-3p  | CARS-AS1      | hsa-miR-186-5p  | RP11-504A18.1  |
| hsa-miR-378h    | RP11-723O4.9  | hsa-miR-26b-5p  | RP11-245P10.6 | hsa-miR-499a-5p | RP11-504A18.1  |
| hsa-miR-378a-3p | RP11-723O4.9  | hsa-miR-378a-3p | LINC01133     | hsa-miR-143-3p  | RP11-525K10.3  |
| hsa-miR-148b-3p | AC104820.2    | hsa-miR-378h    | LINC01133     | hsa-miR-143-3p  | LCMT1-AS1      |
| hsa-miR-143-3p  | RP11-794M8.1  | hsa-miR-186-5p  | RP11-403I13.5 | hsa-miR-186-5p  | LCMT1-AS1      |
| hsa-miR-199a-5p | RP11-298D21.1 | hsa-miR-421     | LINC01433     | hsa-miR-27b-3p  | LCMT1-AS1      |
| hsa-miR-143-3p  | AC004231.2    | hsa-miR-140-3p  | LINC00632     | hsa-miR-199a-5p | AP003774.1     |
| hsa-miR-146b-5p | CTC-251D13.1  | hsa-miR-27b-3p  | AC144831.1    | hsa-miR-34a-5p  | AC007879.1     |
| hsa-miR-140-3p  | RP11-423P10.2 | hsa-miR-125b-5p | PRKG1-AS1     | hsa-miR-186-5p  | RP11-315O6.1   |
| hsa-miR-186-5p  | CFLAR-AS1     | hsa-miR-27b-3p  | MIMT1         | hsa-miR-499a-5p | RP11-92F20.1   |
| hsa-miR-146b-5p | CFLAR-AS1     | hsa-miR-143-3p  | MIMT1         | hsa-miR-27b-3p  | RP11-562A8.4   |
| hsa-miR-143-3p  | CFLAR-AS1     | hsa-miR-421     | RP11-1105G2.4 | hsa-miR-27b-3p  | CTD-2659N19.9  |
| hsa-miR-125b-5p | CFLAR-AS1     | hsa-miR-34a-5p  | AC012668.2    | hsa-miR-146b-5p | WI2-85898F10.2 |
| hsa-miR-27b-3p  | RP11-152H18.4 | hsa-miR-221-3p  | LINC00158     | hsa-miR-378a-3p | RP11-322E11.2  |
| hsa-miR-25-3p   | AC016700.2    | hsa-miR-143-3p  | LINC00158     | hsa-miR-378h    | RP11-322E11.2  |

|                 |                     |                 |               |                 |               |
|-----------------|---------------------|-----------------|---------------|-----------------|---------------|
| hsa-miR-143-3p  | AC016644.1          | hsa-miR-186-5p  | LINC00158     | hsa-miR-186-5p  | RP11-322E11.2 |
| hsa-miR-34a-5p  | RP4-673M15.1        | hsa-miR-25-3p   | AC093375.1    | hsa-miR-374b-5p | RP11-322E11.2 |
| hsa-miR-143-3p  | RP11-370A5.2        | hsa-miR-199a-5p | RP11-260M2.1  | hsa-miR-421     | RP11-322E11.2 |
| hsa-miR-27b-3p  | RP11-223P11.3       | hsa-miR-221-3p  | AF067845.1    | hsa-miR-140-3p  | RP11-317N8.3  |
| hsa-miR-374b-5p | AC007163.3          | hsa-miR-186-5p  | RP11-37L2.1   | hsa-miR-186-5p  | RP11-244M2.1  |
| hsa-miR-27b-3p  | RP11-707P17.2       | hsa-miR-27b-3p  | LINC00996     | hsa-miR-146b-5p | RP11-244M2.1  |
| hsa-miR-34a-5p  | RP11-544A12.4       | hsa-miR-186-5p  | LINC00996     | hsa-miR-421     | RP11-244M2.1  |
| hsa-miR-27b-3p  | RP11-278A23.2       | hsa-miR-27b-3p  | RP11-44N11.1  | hsa-miR-186-5p  | AC005220.3    |
| hsa-miR-26b-5p  | LL21NC02-<br>1C16.2 | hsa-miR-27b-3p  | AC025171.1    | hsa-miR-146b-5p | AC005220.3    |
| hsa-miR-125b-5p | RP11-106D4.2        | hsa-miR-143-3p  | AC025171.1    | hsa-miR-421     | AC003984.1    |
| hsa-miR-146b-5p | RP11-429B14.4       | hsa-miR-26b-5p  | AC025171.1    | hsa-miR-143-3p  | AC003984.1    |
| hsa-miR-221-3p  | RP11-563P16.1       | hsa-miR-27b-3p  | ENOX1-AS1     | hsa-miR-26b-5p  | AC003984.1    |
| hsa-miR-143-3p  | RP11-636O21.1       | hsa-miR-34a-5p  | CTD-2560E9.5  | hsa-miR-374b-5p | AC003984.1    |
| hsa-miR-27b-3p  | AC105402.4          | hsa-miR-499a-5p | RP11-519G16.3 | hsa-miR-143-3p  | RP11-944C7.1  |
| hsa-miR-421     | AC105402.4          | hsa-miR-374b-5p | RP11-519G16.3 | hsa-miR-186-5p  | RP11-944C7.1  |
| hsa-miR-186-5p  | HNRNPU-AS1          | hsa-miR-140-3p  | LINC01183     | hsa-miR-34a-5p  | CTC-499B15.7  |
| hsa-miR-26b-5p  | HNRNPU-AS1          | hsa-miR-499a-5p | CTD-2288O8.1  | hsa-miR-143-3p  | RP11-307P5.1  |
| hsa-miR-27b-3p  | HNRNPU-AS1          | hsa-miR-27b-3p  | RP11-354K1.1  | hsa-miR-27b-3p  | RP11-307P5.1  |
| hsa-miR-421     | RP11-480D4.6        | hsa-miR-143-3p  | RP11-373E16.3 | hsa-miR-140-3p  | RP11-255M2.1  |
| hsa-miR-148a-3p | HOTAIR              | hsa-miR-186-5p  | RP11-373E16.3 | hsa-miR-25-3p   | RP11-346J10.1 |
| hsa-miR-148b-3p | HOTAIR              | hsa-miR-499a-5p | RP11-373E16.3 | hsa-miR-27b-3p  | RP5-1116H23.4 |
| hsa-miR-221-3p  | HOTAIR              | hsa-miR-146b-5p | RP11-373E16.3 | hsa-miR-140-3p  | VAC14-AS1     |
| hsa-miR-148b-3p | AC002064.4          | hsa-miR-26b-5p  | AC008277.1    | hsa-miR-421     | EIF1AX-AS1    |
| hsa-miR-186-5p  | C3orf67-AS1         | hsa-miR-186-5p  | AC006548.28   | hsa-miR-143-3p  | RP11-68I3.5   |
| hsa-miR-140-3p  | C3orf67-AS1         | hsa-miR-27b-3p  | AC006548.28   | hsa-miR-27b-3p  | LINC01179     |
| hsa-miR-27b-3p  | RP11-528G1.2        | hsa-miR-125b-5p | AC006548.28   | hsa-miR-34a-5p  | RP11-752D24.2 |
| hsa-miR-125b-5p | RP11-406H4.1        | hsa-miR-421     | AC006548.28   | hsa-miR-186-5p  | RP11-752D24.2 |

|                 |               |                 |               |                 |               |
|-----------------|---------------|-----------------|---------------|-----------------|---------------|
| hsa-miR-186-5p  | AC096669.1    | hsa-miR-146b-5p | AC006548.28   | hsa-miR-186-5p  | RP11-545A16.4 |
| hsa-miR-199a-5p | AC096669.1    | hsa-miR-140-3p  | AC006548.28   | hsa-miR-186-5p  | RP11-73O6.3   |
| hsa-miR-25-3p   | LINC01428     | hsa-miR-374b-5p | AC006548.28   | hsa-miR-34a-5p  | RP11-168K11.3 |
| hsa-miR-34a-5p  | RP4-695O20.1  | hsa-miR-378h    | AC006548.28   | hsa-miR-25-3p   | RP11-664D7.4  |
| hsa-miR-27b-3p  | AP000695.6    | hsa-miR-378a-3p | AC006548.28   | hsa-miR-374b-5p | RP11-79H23.3  |
| hsa-miR-26b-5p  | RP4-694A7.2   | hsa-miR-26b-5p  | AC006548.28   | hsa-miR-27b-3p  | RP11-79H23.3  |
| hsa-miR-143-3p  | HNF4A-AS1     | hsa-miR-143-3p  | AC006548.28   | hsa-miR-499a-5p | RP11-79H23.3  |
| hsa-miR-499a-5p | RP11-366L20.2 | hsa-miR-34a-5p  | AC006548.28   | hsa-miR-27b-3p  | RP11-981G7.1  |
| hsa-miR-378h    | RP11-366L20.2 | hsa-miR-148a-3p | AC006548.28   | hsa-miR-146b-5p | RP11-981G7.1  |
| hsa-miR-27b-3p  | RP11-449P15.2 | hsa-miR-199a-5p | AC006548.28   | hsa-miR-421     | RP11-981G7.1  |
| hsa-miR-143-3p  | RP11-91K8.5   | hsa-miR-148b-3p | AC006548.28   | hsa-miR-186-5p  | RP11-981G7.1  |
| hsa-miR-26b-5p  | AC005498.3    | hsa-miR-25-3p   | AC006548.28   | hsa-miR-421     | IGBP1-AS1     |
| hsa-miR-148b-3p | AC005498.3    | hsa-miR-499a-5p | AC006548.28   | hsa-miR-148a-3p | CTC-523E23.1  |
| hsa-miR-25-3p   | AC159540.1    | hsa-miR-221-3p  | AC006548.28   | hsa-miR-34a-5p  | RP11-617F23.1 |
| hsa-miR-186-5p  | AC159540.1    | hsa-miR-27b-3p  | LINC00925     | hsa-miR-146b-5p | RP11-617F23.1 |
| hsa-miR-34a-5p  | CTD-2537I9.12 | hsa-miR-125b-5p | FLJ16779      | hsa-miR-27b-3p  | RP1-239B22.5  |
| hsa-miR-25-3p   | GTF3C2-AS1    | hsa-miR-34a-5p  | FLJ16779      | hsa-miR-27b-3p  | CTA-797E19.1  |
| hsa-miR-378h    | AC007292.6    | hsa-miR-186-5p  | RP11-686D22.4 | hsa-miR-25-3p   | CTD-2332E11.2 |
| hsa-miR-27b-3p  | AC078942.1    | hsa-miR-27b-3p  | FAM66A        | hsa-miR-34a-5p  | SIK3-IT1      |
| hsa-miR-125b-5p | RP3-365O12.2  | hsa-miR-125b-5p | FAM66A        | hsa-miR-143-3p  | CTA-243E7.1   |
| hsa-miR-186-5p  | RP4-671O14.6  | hsa-miR-143-3p  | LOXL1-AS1     | hsa-miR-148a-3p | CTA-243E7.1   |
| hsa-miR-143-3p  | RP4-671O14.6  | hsa-miR-186-5p  | LOXL1-AS1     | hsa-miR-499a-5p | CTA-243E7.1   |
| hsa-miR-125b-5p | RP4-671O14.6  | hsa-miR-374b-5p | LOXL1-AS1     | hsa-miR-27b-3p  | CTA-243E7.1   |
| hsa-miR-25-3p   | RP4-671O14.6  | hsa-miR-421     | LOXL1-AS1     | hsa-miR-148b-3p | CTA-243E7.1   |
| hsa-miR-421     | TBX5-AS1      | hsa-miR-34a-5p  | LINC00595     | hsa-miR-125b-5p | CTA-243E7.1   |
| hsa-miR-378a-3p | TBX5-AS1      | hsa-miR-378h    | EPN2-AS1      | hsa-miR-221-3p  | CTA-243E7.1   |
| hsa-miR-378h    | TBX5-AS1      | hsa-miR-378a-3p | EPN2-AS1      | hsa-miR-26b-5p  | CTA-243E7.1   |
| hsa-miR-421     | RP11-613F22.8 | hsa-miR-26b-5p  | RP11-430H10.1 | hsa-miR-374b-5p | RP11-61K9.2   |

|                 |               |                 |               |                 |               |
|-----------------|---------------|-----------------|---------------|-----------------|---------------|
| hsa-miR-186-5p  | RP11-613F22.8 | hsa-miR-378a-3p | CTD-3193K9.3  | hsa-miR-378a-3p | TEX41         |
| hsa-miR-26b-5p  | DDX11-AS1     | hsa-miR-378h    | CTD-3193K9.3  | hsa-miR-143-3p  | TEX41         |
| hsa-miR-26b-5p  | RP3-473B4.3   | hsa-miR-148b-3p | LA16c-390H2.4 | hsa-miR-378h    | TEX41         |
| hsa-miR-186-5p  | TMCC1-AS1     | hsa-miR-148a-3p | LA16c-390H2.4 | hsa-miR-148b-3p | TEX41         |
| hsa-miR-199a-5p | TMCC1-AS1     | hsa-miR-34a-5p  | LINC01252     | hsa-miR-148a-3p | TEX41         |
| hsa-miR-199a-5p | CTD-2542L18.1 | hsa-miR-199a-5p | CTD-2525I3.5  | hsa-miR-186-5p  | TEX41         |
| hsa-miR-421     | CTD-2542L18.1 | hsa-miR-186-5p  | AC092675.3    | hsa-miR-421     | TEX41         |
| hsa-miR-143-3p  | RP11-903H12.3 | hsa-miR-186-5p  | CTC-573N18.1  | hsa-miR-25-3p   | TEX41         |
| hsa-miR-148a-3p | RTCA-AS1      | hsa-miR-148a-3p | RP11-70D24.2  | hsa-miR-27b-3p  | TEX41         |
| hsa-miR-148b-3p | RTCA-AS1      | hsa-miR-148b-3p | RP11-70D24.2  | hsa-miR-125b-5p | TEX41         |
| hsa-miR-148a-3p | RP11-91K9.1   | hsa-miR-27b-3p  | CTC-499B15.6  | hsa-miR-186-5p  | NEAT1         |
| hsa-miR-148b-3p | RP11-91K9.1   | hsa-miR-143-3p  | RP11-24F11.2  | hsa-miR-27b-3p  | NEAT1         |
| hsa-miR-143-3p  | AC004837.5    | hsa-miR-27b-3p  | CTD-2240J17.1 | hsa-miR-140-3p  | NEAT1         |
| hsa-miR-34a-5p  | AC010127.3    | hsa-miR-143-3p  | CTA-929C8.6   | hsa-miR-34a-5p  | NEAT1         |
| hsa-miR-421     | AC010127.3    | hsa-miR-199a-5p | CTA-929C8.6   | hsa-miR-26b-5p  | NEAT1         |
| hsa-miR-186-5p  | AC010127.3    | hsa-miR-186-5p  | CTA-929C8.6   | hsa-miR-146b-5p | NEAT1         |
| hsa-miR-140-3p  | AC010127.3    | hsa-miR-146b-5p | F10-AS1       | hsa-miR-148a-3p | NEAT1         |
| hsa-miR-27b-3p  | CTB-138E5.1   | hsa-miR-146b-5p | RP11-415J8.7  | hsa-miR-125b-5p | NEAT1         |
| hsa-miR-143-3p  | RP5-836N17.4  | hsa-miR-374b-5p | AC011343.1    | hsa-miR-148b-3p | NEAT1         |
| hsa-miR-374b-5p | LINC00461     | hsa-miR-34a-5p  | AC011343.1    | hsa-miR-374b-5p | NEAT1         |
| hsa-miR-27b-3p  | LINC00461     | hsa-miR-140-3p  | AC011343.1    | hsa-miR-421     | NEAT1         |
| hsa-miR-125b-5p | LINC00461     | hsa-miR-143-3p  | AC011343.1    | hsa-miR-499a-5p | NEAT1         |
| hsa-miR-221-3p  | LINC00461     | hsa-miR-421     | RP5-1057B20.3 | hsa-miR-27b-3p  | RP11-1085N6.2 |
| hsa-miR-25-3p   | LINC00461     | hsa-miR-186-5p  | RP5-1057B20.3 | hsa-miR-27b-3p  | C9orf41-AS1   |
| hsa-miR-140-3p  | RP1-20B11.2   | hsa-miR-27b-3p  | RP11-674E16.4 | hsa-miR-148a-3p | NFIA-AS2      |
| hsa-miR-26b-5p  | RP11-348N5.7  | hsa-miR-374b-5p | RP11-674E16.4 | hsa-miR-148b-3p | NFIA-AS2      |
| hsa-miR-27b-3p  | LINC01280     | hsa-miR-140-3p  | CTA-544A11.1  | hsa-miR-27b-3p  | RP11-89K21.1  |
| hsa-miR-421     | RP11-804N13.1 | hsa-miR-146b-5p | CTA-544A11.1  | hsa-miR-186-5p  | RP11-89K21.1  |

|                 |               |                 |               |                 |               |
|-----------------|---------------|-----------------|---------------|-----------------|---------------|
| hsa-miR-186-5p  | RP11-804N13.1 | hsa-miR-186-5p  | CTA-544A11.1  | hsa-miR-199a-5p | RP11-65M17.3  |
| hsa-miR-374b-5p | RP13-192B19.2 | hsa-miR-499a-5p | CTA-544A11.1  | hsa-miR-374b-5p | RP11-65M17.3  |
| hsa-miR-186-5p  | RP13-192B19.2 | hsa-miR-378a-3p | CTA-544A11.1  | hsa-miR-221-3p  | RP11-815J21.1 |
| hsa-miR-143-3p  | RP11-737O24.2 | hsa-miR-499a-5p | RP11-2I17.4   | hsa-miR-143-3p  | LINC01146     |
| hsa-miR-199a-5p | RP11-798M19.6 | hsa-miR-186-5p  | RP11-310H4.3  | hsa-miR-374b-5p | RP11-259N19.1 |
| hsa-miR-143-3p  | LA16c-361A3.3 | hsa-miR-27b-3p  | RP11-127L20.3 | hsa-miR-378a-3p | RP11-234K24.3 |
| hsa-miR-148b-3p | LA16c-361A3.3 | hsa-miR-148b-3p | CTD-2334D19.1 | hsa-miR-26b-5p  | RP11-234K24.3 |
| hsa-miR-148a-3p | LA16c-361A3.3 | hsa-miR-148a-3p | CTD-2334D19.1 | hsa-miR-378h    | RP11-234K24.3 |
| hsa-miR-146b-5p | RP11-553L6.2  | hsa-miR-27b-3p  | RP11-379K22.2 | hsa-miR-27b-3p  | RP11-105N14.2 |
| hsa-miR-499a-5p | RP11-553L6.2  | hsa-miR-25-3p   | RP11-379K22.2 | hsa-miR-146b-5p | IDI2-AS1      |
| hsa-miR-499a-5p | LINC00115     | hsa-miR-146b-5p | RP3-466P17.1  | hsa-miR-143-3p  | RP5-1057I20.2 |
| hsa-miR-27b-3p  | RP11-837J7.4  | hsa-miR-186-5p  | RP3-466P17.1  | hsa-miR-374b-5p | RP11-586K2.1  |
| hsa-miR-125b-5p | RP11-227G15.9 | hsa-miR-378a-3p | RP11-3P22.2   | hsa-miR-125b-5p | RP11-586K2.1  |
| hsa-miR-26b-5p  | RP4-533D7.4   | hsa-miR-378h    | RP11-3P22.2   | hsa-miR-199a-5p | RP11-586K2.1  |
| hsa-miR-26b-5p  | AP001429.1    | hsa-miR-125b-5p | CTD-2201I18.1 | hsa-miR-125b-5p | RP11-52J3.2   |
| hsa-miR-27b-3p  | AP001429.1    | hsa-miR-186-5p  | CTA-212A2.3   | hsa-miR-148a-3p | CTD-3131K8.2  |
| hsa-miR-374b-5p | RP3-523K23.2  | hsa-miR-143-3p  | CTA-212A2.3   | hsa-miR-148b-3p | CTD-3131K8.2  |
| hsa-miR-25-3p   | RP3-523K23.2  | hsa-miR-34a-5p  | CTA-212A2.3   | hsa-miR-26b-5p  | RP11-513D5.2  |
| hsa-miR-378h    | RP11-323F24.4 | hsa-miR-221-3p  | CTA-212A2.3   | hsa-miR-186-5p  | KB-1552D7.2   |
| hsa-miR-378a-3p | RP11-323F24.4 | hsa-miR-378a-3p | RP11-374M1.5  | hsa-miR-25-3p   | KB-1552D7.2   |
| hsa-miR-34a-5p  | RP11-219E7.2  | hsa-miR-378h    | RP11-374M1.5  | hsa-miR-125b-5p | KB-1552D7.2   |
| hsa-miR-27b-3p  | RP11-586D19.2 | hsa-miR-27b-3p  | RP11-855A2.3  | hsa-miR-378a-3p | RP11-211N11.5 |
| hsa-miR-199a-5p | RP11-757G1.6  | hsa-miR-421     | RP11-855A2.3  | hsa-miR-378h    | RP11-211N11.5 |
| hsa-miR-221-3p  | RP11-757G1.6  | hsa-miR-125b-5p | RP11-855A2.3  | hsa-miR-199a-5p | AC003003.5    |
| hsa-miR-26b-5p  | RP11-757G1.6  | hsa-miR-186-5p  | RP11-731J8.2  | hsa-miR-25-3p   | CTB-5E10.3    |
| hsa-miR-125b-5p | RP11-757G1.6  | hsa-miR-34a-5p  | RP11-731J8.2  | hsa-miR-27b-3p  | RP11-689B22.2 |
| hsa-miR-186-5p  | RP11-757G1.6  | hsa-miR-143-3p  | AC099684.1    | hsa-miR-143-3p  | LINC00528     |
| hsa-miR-374b-5p | RP11-757G1.6  | hsa-miR-125b-5p | AC099684.1    | hsa-miR-140-3p  | LINC00528     |



|                 |               |                 |               |                 |               |
|-----------------|---------------|-----------------|---------------|-----------------|---------------|
| hsa-miR-34a-5p  | RP11-757G1.6  | hsa-miR-125b-5p | RP11-42I10.1  | hsa-miR-26b-5p  | RP11-181K12.2 |
| hsa-miR-421     | LINC01108     | hsa-miR-26b-5p  | RP13-991F5.2  | hsa-miR-186-5p  | RP11-281P23.1 |
| hsa-miR-374b-5p | STEAP3-AS1    | hsa-miR-27b-3p  | RP13-991F5.2  | hsa-miR-499a-5p | TBL1XR1-AS1   |
| hsa-miR-143-3p  | GK-IT1        | hsa-miR-186-5p  | AC002429.5    | hsa-miR-143-3p  | RP11-266K4.9  |
| hsa-miR-143-3p  | LINC00284     | hsa-miR-199a-5p | CCDC26        | hsa-miR-499a-5p | RP11-266K4.9  |
| hsa-miR-27b-3p  | LINC00284     | hsa-miR-499a-5p | RP11-255E6.6  | hsa-miR-26b-5p  | RP11-280K24.4 |
| hsa-miR-125b-5p | LINC01152     | hsa-miR-125b-5p | CTD-2231E14.8 | hsa-miR-186-5p  | RP11-280K24.4 |
| hsa-miR-499a-5p | LINC00222     | hsa-miR-148a-3p | RP11-47L3.1   | hsa-miR-125b-5p | RP5-875O13.1  |
| hsa-miR-26b-5p  | LINC00222     | hsa-miR-148b-3p | RP11-47L3.1   | hsa-miR-143-3p  | RP5-875O13.1  |
| hsa-miR-143-3p  | CTD-2269F5.1  | hsa-miR-34a-5p  | ZIM2-AS1      | hsa-miR-146b-5p | LINC00494     |
| hsa-miR-421     | CTD-2269F5.1  | hsa-miR-199a-5p | ZIM2-AS1      | hsa-miR-140-3p  | GCSAML-AS1    |
| hsa-miR-25-3p   | AC018730.4    | hsa-miR-143-3p  | ZIM2-AS1      | hsa-miR-27b-3p  | GCSAML-AS1    |
| hsa-miR-26b-5p  | RP4-635E18.8  | hsa-miR-378a-3p | DNMBP-AS1     | hsa-miR-421     | GCSAML-AS1    |
| hsa-miR-421     | RP4-635E18.8  | hsa-miR-378h    | DNMBP-AS1     | hsa-miR-148a-3p | GCSAML-AS1    |
| hsa-miR-421     | CTD-2377O17.1 | hsa-miR-143-3p  | DNMBP-AS1     | hsa-miR-199a-5p | RP11-320P7.2  |
| hsa-miR-148b-3p | DHRS4-AS1     | hsa-miR-25-3p   | AC004775.5    | hsa-miR-146b-5p | RP11-320P7.2  |
| hsa-miR-143-3p  | DHRS4-AS1     | hsa-miR-378a-3p | RP11-367J11.2 | hsa-miR-27b-3p  | LURAP1L-AS1   |
| hsa-miR-148a-3p | DHRS4-AS1     | hsa-miR-378h    | RP11-367J11.2 | hsa-miR-421     | ZFAS1         |
| hsa-miR-186-5p  | RP11-329J18.3 | hsa-miR-143-3p  | RP11-367J11.2 | hsa-miR-27b-3p  | ZFAS1         |
| hsa-miR-421     | TMLHE-AS1     | hsa-miR-27b-3p  | RP11-367J11.2 | hsa-miR-199a-5p | RP5-1142A6.9  |
| hsa-miR-186-5p  | RP11-363J20.1 | hsa-miR-186-5p  | RP5-1116H23.6 | hsa-miR-186-5p  | CTD-2292P10.4 |
| hsa-miR-27b-3p  | SPATA3-AS1    | hsa-miR-499a-5p | LINC01343     | hsa-miR-186-5p  | RP11-646I6.6  |
| hsa-miR-26b-5p  | AC009505.2    | hsa-miR-34a-5p  | AC147651.5    | hsa-miR-421     | AC068039.4    |
| hsa-miR-34a-5p  | AC009505.2    | hsa-miR-125b-5p | RP11-141J13.5 | hsa-miR-25-3p   | AC068039.4    |
| hsa-miR-143-3p  | RP11-445P17.3 | hsa-miR-34a-5p  | NAMA          | hsa-miR-26b-5p  | AC068039.4    |
| hsa-miR-186-5p  | RP11-517I3.1  | hsa-miR-146b-5p | RP11-789C2.1  | hsa-miR-374b-5p | AC068039.4    |
| hsa-miR-421     | RP11-705C15.3 | hsa-miR-146b-5p | RP11-417E7.2  | hsa-miR-186-5p  | AC068039.4    |
| hsa-miR-186-5p  | RP11-705C15.3 | hsa-miR-186-5p  | RP11-417E7.2  | hsa-miR-146b-5p | RP11-325K4.2  |

|                 |               |                 |               |                 |                |
|-----------------|---------------|-----------------|---------------|-----------------|----------------|
| hsa-miR-25-3p   | LLNLR-470E3.1 | hsa-miR-34a-5p  | CTA-414D7.1   | hsa-miR-143-3p  | RP11-598F7.4   |
| hsa-miR-146b-5p | LLNLR-470E3.1 | hsa-miR-421     | CTA-414D7.1   | hsa-miR-186-5p  | RP11-598F7.4   |
| hsa-miR-125b-5p | RP11-381N20.1 | hsa-miR-125b-5p | CTA-414D7.1   | hsa-miR-421     | RP11-689K5.3   |
| hsa-miR-148a-3p | RP11-73M18.8  | hsa-miR-374b-5p | RP11-556E13.1 | hsa-miR-143-3p  | AC096579.13    |
| hsa-miR-148b-3p | RP11-73M18.8  | hsa-miR-143-3p  | LINC01141     | hsa-miR-186-5p  | RP11-111E14.1  |
| hsa-miR-421     | RP11-434D9.1  | hsa-miR-186-5p  | CTB-129O4.1   | hsa-miR-26b-5p  | CTA-331P3.1    |
| hsa-miR-146b-5p | RP11-434D9.1  | hsa-miR-143-3p  | RP11-158I9.5  | hsa-miR-499a-5p | CTA-331P3.1    |
| hsa-miR-143-3p  | MLK7-AS1      | hsa-miR-125b-5p | AP001055.6    | hsa-miR-143-3p  | AC019117.1     |
| hsa-miR-186-5p  | MLK7-AS1      | hsa-miR-146b-5p | RP11-75L1.1   | hsa-miR-140-3p  | AC019117.1     |
| hsa-miR-146b-5p | MLK7-AS1      | hsa-miR-186-5p  | RP11-75L1.1   | hsa-miR-499a-5p | AC019181.2     |
| hsa-miR-27b-3p  | RP11-356J5.12 | hsa-miR-378h    | RP4-594I10.3  | hsa-miR-34a-5p  | LINC00640      |
| hsa-miR-374b-5p | RP11-356J5.12 | hsa-miR-378a-3p | RP4-594I10.3  | hsa-miR-221-3p  | RP11-1035H13.2 |
| hsa-miR-186-5p  | RP11-356J5.12 | hsa-miR-27b-3p  | RP4-594I10.3  | hsa-miR-26b-5p  | CTD-2506J14.1  |
| hsa-miR-199a-5p | RP11-356J5.12 | hsa-miR-146b-5p | PWRN1         | hsa-miR-374b-5p | RP11-96C23.9   |
| hsa-miR-140-3p  | RP11-673E1.4  | hsa-miR-186-5p  | PWRN1         | hsa-miR-140-3p  | RP11-446J8.1   |
| hsa-miR-199a-5p | RP11-673E1.4  | hsa-miR-421     | PWRN1         | hsa-miR-125b-5p | AC096669.3     |
| hsa-miR-374b-5p | RP11-560G2.1  | hsa-miR-140-3p  | PWRN1         | hsa-miR-34a-5p  | AC096669.3     |
| hsa-miR-421     | RP4-798A10.2  | hsa-miR-499a-5p | PWRN1         | hsa-miR-378h    | CTC-366B18.4   |
| hsa-miR-143-3p  | RP11-275I4.2  | hsa-miR-125b-5p | PWRN1         | hsa-miR-378a-3p | CTC-366B18.4   |
| hsa-miR-25-3p   | RP11-279O17.1 | hsa-miR-34a-5p  | RP11-405M12.4 | hsa-miR-148b-3p | CTC-366B18.4   |
| hsa-miR-499a-5p | SLC16A1-AS1   | hsa-miR-27b-3p  | RP11-313D6.3  | hsa-miR-374b-5p | CTC-366B18.4   |
| hsa-miR-143-3p  | SLC16A1-AS1   | hsa-miR-143-3p  | RP11-161H23.9 | hsa-miR-125b-5p | RP11-244F12.3  |
| hsa-miR-140-3p  | AC007292.3    | hsa-miR-34a-5p  | F11-AS1       | hsa-miR-148b-3p | RP11-244F12.3  |
| hsa-miR-27b-3p  | RP11-840I19.3 | hsa-miR-140-3p  | RP11-463D19.1 | hsa-miR-140-3p  | RP11-528N21.1  |
| hsa-miR-34a-5p  | RP11-840I19.3 | hsa-miR-199a-5p | RP11-575L7.8  | hsa-miR-186-5p  | RP11-528N21.1  |
| hsa-miR-140-3p  | RP1-105O18.1  | hsa-miR-186-5p  | RP3-325F22.5  | hsa-miR-186-5p  | RP13-487P22.1  |
| hsa-miR-378a-3p | LINC00313     | hsa-miR-143-3p  | AC005253.2    | hsa-miR-143-3p  | RP11-104N10.1  |
| hsa-miR-378h    | LINC00313     | hsa-miR-499a-5p | RP11-84C10.4  | hsa-miR-26b-5p  | CTD-2044J15.1  |

|                 |               |                 |               |                 |                |
|-----------------|---------------|-----------------|---------------|-----------------|----------------|
| hsa-miR-374b-5p | RP11-130L8.2  | hsa-miR-26b-5p  | RP11-84C10.4  | hsa-miR-148b-3p | LINC00087      |
| hsa-miR-421     | RP11-309M7.1  | hsa-miR-27b-3p  | RP11-84C10.4  | hsa-miR-378a-3p | DIO3OS         |
| hsa-miR-221-3p  | RP11-96D1.10  | hsa-miR-374b-5p | LINC00890     | hsa-miR-378h    | DIO3OS         |
| hsa-miR-374b-5p | RP11-338N10.3 | hsa-miR-125b-5p | PSMG3-AS1     | hsa-miR-374b-5p | SNHG22         |
| hsa-miR-378h    | AC093818.1    | hsa-miR-34a-5p  | AP001628.6    | hsa-miR-148b-3p | RP11-433A10.3  |
| hsa-miR-378a-3p | AC093818.1    | hsa-miR-125b-5p | RP11-288L9.4  | hsa-miR-148a-3p | RP11-433A10.3  |
| hsa-miR-125b-5p | RP11-573D15.2 | hsa-miR-27b-3p  | RP11-713D19.1 | hsa-miR-26b-5p  | AC053503.4     |
| hsa-miR-186-5p  | AC078941.1    | hsa-miR-125b-5p | LINC01224     | hsa-miR-146b-5p | RP11-142C4.6   |
| hsa-miR-148b-3p | AC078941.1    | hsa-miR-186-5p  | LINC01224     | hsa-miR-148b-3p | RP11-142C4.6   |
| hsa-miR-148a-3p | AC078941.1    | hsa-miR-34a-5p  | LINC01224     | hsa-miR-34a-5p  | RP11-142C4.6   |
| hsa-miR-27b-3p  | RAPGEF4-AS1   | hsa-miR-143-3p  | LINC01224     | hsa-miR-186-5p  | AC010976.2     |
| hsa-miR-186-5p  | RAPGEF4-AS1   | hsa-miR-27b-3p  | LINC01224     | hsa-miR-27b-3p  | LINC01567      |
| hsa-miR-25-3p   | RAPGEF4-AS1   | hsa-miR-146b-5p | RP11-166P13.4 | hsa-miR-34a-5p  | RP11-171I2.4   |
| hsa-miR-221-3p  | RAPGEF4-AS1   | hsa-miR-34a-5p  | RP5-1071N3.1  | hsa-miR-186-5p  | RP11-274H2.5   |
| hsa-miR-186-5p  | AC012531.25   | hsa-miR-148b-3p | PSORS1C3      | hsa-miR-25-3p   | RP11-274H2.5   |
| hsa-miR-374b-5p | AC012531.25   | hsa-miR-378h    | CTD-3128G10.6 | hsa-miR-374b-5p | RP11-152L20.3  |
| hsa-miR-140-3p  | RP11-802E16.3 | hsa-miR-378a-3p | CTD-3128G10.6 | hsa-miR-34a-5p  | RP11-152L20.3  |
| hsa-miR-374b-5p | CTD-2506P8.6  | hsa-miR-125b-5p | RP1-67A8.3    | hsa-miR-140-3p  | GS1-304P7.3    |
| hsa-miR-499a-5p | KB-1208A12.3  | hsa-miR-199a-5p | RP4-800J21.3  | hsa-miR-140-3p  | RP11-661A12.12 |
| hsa-miR-148a-3p | RP11-576D8.4  | hsa-miR-186-5p  | LEMD1-AS1     | hsa-miR-26b-5p  | CTA-256D12.11  |
| hsa-miR-148b-3p | RP11-576D8.4  | hsa-miR-146b-5p | LEMD1-AS1     | hsa-miR-374b-5p | RP11-713N11.6  |
| hsa-miR-221-3p  | RP11-576D8.4  | hsa-miR-27b-3p  | FOXD2-AS1     | hsa-miR-143-3p  | RP11-480A16.1  |
| hsa-miR-186-5p  | AC093690.1    | hsa-miR-26b-5p  | RP11-588L15.2 | hsa-miR-140-3p  | RP11-480A16.1  |
| hsa-miR-27b-3p  | AC093690.1    | hsa-miR-27b-3p  | RP11-104O19.4 | hsa-miR-186-5p  | RP11-399O19.9  |
| hsa-miR-34a-5p  | AC093690.1    | hsa-miR-34a-5p  | LINC00621     | hsa-miR-125b-5p | RP1-199J3.7    |
| hsa-miR-148b-3p | KIRREL-IT1    | hsa-miR-27b-3p  | LINC01562     | hsa-miR-199a-5p | LINC01233      |
| hsa-miR-148a-3p | KIRREL-IT1    | hsa-miR-27b-3p  | RP11-18H21.3  | hsa-miR-125b-5p | RP11-301L8.2   |
| hsa-miR-421     | C1orf132      | hsa-miR-140-3p  | CTC-498M16.4  | hsa-miR-125b-5p | RP11-165M1.3   |

|                 |               |                 |                |                 |                |
|-----------------|---------------|-----------------|----------------|-----------------|----------------|
| hsa-miR-27b-3p  | C1orf132      | hsa-miR-186-5p  | RP11-30K9.4    | hsa-miR-186-5p  | RP11-1007G5.2  |
| hsa-miR-378a-3p | C1orf132      | hsa-miR-27b-3p  | RP6-109B7.2    | hsa-miR-378a-3p | RP11-1007G5.2  |
| hsa-miR-378h    | C1orf132      | hsa-miR-26b-5p  | RP13-616I3.1   | hsa-miR-143-3p  | RP11-1007G5.2  |
| hsa-miR-125b-5p | C1orf132      | hsa-miR-499a-5p | RP11-362F19.1  | hsa-miR-378h    | RP11-1007G5.2  |
| hsa-miR-140-3p  | C1orf132      | hsa-miR-221-3p  | RP11-362F19.1  | hsa-miR-221-3p  | RP11-147L13.8  |
| hsa-miR-34a-5p  | C1orf132      | hsa-miR-34a-5p  | RP11-362F19.1  | hsa-miR-146b-5p | RP11-147L13.8  |
| hsa-miR-34a-5p  | RP11-554I8.2  | hsa-miR-27b-3p  | RP11-362F19.1  | hsa-miR-26b-5p  | RP11-147L13.8  |
| hsa-miR-27b-3p  | RP11-9N12.2   | hsa-miR-125b-5p | RP11-362F19.1  | hsa-miR-374b-5p | RP11-147L13.8  |
| hsa-miR-186-5p  | RP11-9N12.2   | hsa-miR-146b-5p | RP11-981G7.3   | hsa-miR-125b-5p | RP11-478K15.6  |
| hsa-miR-27b-3p  | RP11-61E11.1  | hsa-miR-378a-3p | RP11-1079K10.3 | hsa-miR-27b-3p  | RP11-478K15.6  |
| hsa-miR-378h    | RP11-61E11.1  | hsa-miR-378h    | RP11-1079K10.3 | hsa-miR-125b-5p | KDM5C-IT1      |
| hsa-miR-378a-3p | RP11-61E11.1  | hsa-miR-125b-5p | LINC00838      | hsa-miR-143-3p  | RP11-768F21.1  |
| hsa-miR-374b-5p | AC025811.3    | hsa-miR-186-5p  | NPPA-AS1       | hsa-miR-143-3p  | RP11-116D17.5  |
| hsa-miR-186-5p  | AC025811.3    | hsa-miR-148a-3p | RP11-265D19.6  | hsa-miR-34a-5p  | RP1-69D17.4    |
| hsa-miR-186-5p  | RP11-438B23.2 | hsa-miR-148b-3p | RP11-265D19.6  | hsa-miR-125b-5p | RP1-69D17.4    |
| hsa-miR-125b-5p | RP11-438B23.2 | hsa-miR-186-5p  | RP11-20B24.7   | hsa-miR-143-3p  | RP4-647C14.2   |
| hsa-miR-421     | RP11-438B23.2 | hsa-miR-199a-5p | AC079466.1     | hsa-miR-125b-5p | RP11-386G11.10 |
| hsa-miR-199a-5p | RP11-438B23.2 | hsa-miR-125b-5p | AC079466.1     | hsa-miR-221-3p  | AC069155.1     |
| hsa-miR-143-3p  | RP11-438B23.2 | hsa-miR-378a-3p | AC079466.1     | hsa-miR-26b-5p  | RP4-760C5.3    |
| hsa-miR-199a-5p | CTD-2369P2.8  | hsa-miR-378h    | AC079466.1     | hsa-miR-143-3p  | RP4-760C5.3    |
| hsa-miR-143-3p  | CTA-992D9.8   | hsa-miR-146b-5p | AC079466.1     | hsa-miR-378a-3p | RP1-17K7.2     |
| hsa-miR-27b-3p  | CTA-992D9.8   | hsa-miR-26b-5p  | AC079466.1     | hsa-miR-378h    | RP1-17K7.2     |
| hsa-miR-186-5p  | CTA-992D9.8   | hsa-miR-34a-5p  | AC079466.1     | hsa-miR-146b-5p | AC074289.1     |
| hsa-miR-146b-5p | AC000123.4    | hsa-miR-148b-3p | AC079466.1     | hsa-miR-186-5p  | RP11-262I2.2   |
| hsa-miR-140-3p  | AC000123.4    | hsa-miR-221-3p  | AC079466.1     | hsa-miR-125b-5p | RP11-400F19.18 |
| hsa-miR-186-5p  | RP11-703M24.5 | hsa-miR-186-5p  | AC079466.1     | hsa-miR-148b-3p | RP11-35O15.2   |
| hsa-miR-27b-3p  | RP1-45C12.1   | hsa-miR-125b-5p | RP11-732A19.9  | hsa-miR-186-5p  | RP11-631N16.4  |
| hsa-miR-421     | AC009784.3    | hsa-miR-199a-5p | RP11-478P10.1  | hsa-miR-186-5p  | RP11-180N14.1  |

|                 |               |                 |                |                 |               |
|-----------------|---------------|-----------------|----------------|-----------------|---------------|
| hsa-miR-374b-5p | RP5-921G16.1  | hsa-miR-26b-5p  | RP11-478P10.1  | hsa-miR-186-5p  | CTB-133G6.2   |
| hsa-miR-140-3p  | RP11-102L12.2 | hsa-miR-143-3p  | RP11-478P10.1  | hsa-miR-186-5p  | CTD-2620I22.3 |
| hsa-miR-27b-3p  | RP13-735L24.1 | hsa-miR-27b-3p  | LINC01524      | hsa-miR-221-3p  | AC073326.3    |
| hsa-miR-186-5p  | RP13-735L24.1 | hsa-miR-26b-5p  | LINC01524      | hsa-miR-26b-5p  | AC073326.3    |
| hsa-miR-221-3p  | RP13-735L24.1 | hsa-miR-186-5p  | UG0898H09      | hsa-miR-146b-5p | SOX2-OT       |
| hsa-miR-199a-5p | RP11-267M23.3 | hsa-miR-374b-5p | UG0898H09      | hsa-miR-143-3p  | SOX2-OT       |
| hsa-miR-199a-5p | RP11-57A1.1   | hsa-miR-421     | UG0898H09      | hsa-miR-199a-5p | SOX2-OT       |
| hsa-miR-378a-3p | RP11-709D24.8 | hsa-miR-140-3p  | UG0898H09      | hsa-miR-27b-3p  | SOX2-OT       |
| hsa-miR-378h    | RP11-709D24.8 | hsa-miR-27b-3p  | UG0898H09      | hsa-miR-374b-5p | SOX2-OT       |
| hsa-miR-140-3p  | AC068492.1    | hsa-miR-143-3p  | RP11-778J15.1  | hsa-miR-186-5p  | SOX2-OT       |
| hsa-miR-125b-5p | RP4-591N18.2  | hsa-miR-27b-3p  | RP1-179N16.6   | hsa-miR-421     | SOX2-OT       |
| hsa-miR-34a-5p  | AC004951.6    | hsa-miR-25-3p   | LINC00977      | hsa-miR-25-3p   | SOX2-OT       |
| hsa-miR-125b-5p | AC004951.6    | hsa-miR-27b-3p  | AC012368.1     | hsa-miR-378h    | SOX2-OT       |
| hsa-miR-148b-3p | ITCH-IT1      | hsa-miR-199a-5p | AC009506.1     | hsa-miR-378a-3p | SOX2-OT       |
| hsa-miR-148a-3p | ITCH-IT1      | hsa-miR-143-3p  | CTD-3222D19.12 | hsa-miR-125b-5p | RP11-90M2.5   |
| hsa-miR-186-5p  | RP4-742J24.2  | hsa-miR-186-5p  | CTD-3222D19.12 | hsa-miR-143-3p  | SLC14A2-AS1   |
| hsa-miR-421     | RP11-282K24.3 | hsa-miR-34a-5p  | AP001630.5     | hsa-miR-140-3p  | SLC14A2-AS1   |
| hsa-miR-186-5p  | RP11-282K24.3 | hsa-miR-143-3p  | RP11-1018N14.5 | hsa-miR-148a-3p | SLC14A2-AS1   |
| hsa-miR-143-3p  | RP11-282K24.3 | hsa-miR-27b-3p  | RP11-1018N14.5 | hsa-miR-125b-5p | SLC14A2-AS1   |
| hsa-miR-374b-5p | RP11-282K24.3 | hsa-miR-27b-3p  | IFT74-AS1      | hsa-miR-186-5p  | AC005519.4    |
| hsa-miR-374b-5p | RP11-221J22.2 | hsa-miR-125b-5p | AP000350.5     | hsa-miR-34a-5p  | CTA-305I2.1   |
| hsa-miR-148b-3p | RP11-221J22.2 | hsa-miR-143-3p  | RP11-706O15.1  | hsa-miR-143-3p  | RP11-250B2.6  |
| hsa-miR-146b-5p | RP11-358B23.5 | hsa-miR-27b-3p  | AC002306.1     | hsa-miR-221-3p  | RP11-250B2.6  |
| hsa-miR-374b-5p | RP11-16L21.7  | hsa-miR-27b-3p  | CTD-2008P7.1   | hsa-miR-27b-3p  | RP11-714G18.1 |
| hsa-miR-499a-5p | AC074286.1    | hsa-miR-34a-5p  | RP5-983L19.2   | hsa-miR-421     | RP11-359K18.4 |
| hsa-miR-27b-3p  | AC074286.1    | hsa-miR-34a-5p  | RP11-923I11.4  | hsa-miR-143-3p  | RP11-359K18.4 |
| hsa-miR-146b-5p | AC074286.1    | hsa-miR-374b-5p | CTC-327F10.5   | hsa-miR-199a-5p | RP11-151N17.1 |
| hsa-miR-499a-5p | RP11-53B2.3   | hsa-miR-25-3p   | CTC-327F10.5   | hsa-miR-25-3p   | RP11-678G15.1 |

|                 |                |                 |               |                 |                |
|-----------------|----------------|-----------------|---------------|-----------------|----------------|
| hsa-miR-26b-5p  | RP11-439H8.4   | hsa-miR-27b-3p  | RP11-19D2.2   | hsa-miR-125b-5p | RP11-574K11.29 |
| hsa-miR-27b-3p  | RP11-439H8.4   | hsa-miR-125b-5p | RP11-19D2.2   | hsa-miR-26b-5p  | RP11-574K11.29 |
| hsa-miR-125b-5p | RP11-428G5.5   | hsa-miR-186-5p  | CTD-3138B18.6 | hsa-miR-499a-5p | RP11-574K11.29 |
| hsa-miR-186-5p  | CTA-276F8.1    | hsa-miR-27b-3p  | RP11-96A15.1  | hsa-miR-27b-3p  | RP11-574K11.29 |
| hsa-miR-27b-3p  | TMPRSS4-AS1    | hsa-miR-140-3p  | RP11-529E10.7 | hsa-miR-143-3p  | BDNF-AS        |
| hsa-miR-140-3p  | LINC00347      | hsa-miR-143-3p  | PLS3-AS1      | hsa-miR-26b-5p  | BDNF-AS        |
| hsa-miR-199a-5p | LINC00347      | hsa-miR-27b-3p  | LINC01226     | hsa-miR-421     | RP11-114H24.6  |
| hsa-miR-374b-5p | LINC00347      | hsa-miR-186-5p  | CTD-2201E18.5 | hsa-miR-499a-5p | RP5-855D21.3   |
| hsa-miR-143-3p  | RP11-89N17.3   | hsa-miR-27b-3p  | ASTN2-AS1     | hsa-miR-186-5p  | RP5-855D21.3   |
| hsa-miR-26b-5p  | RP11-13N13.5   | hsa-miR-186-5p  | LINC01415     | hsa-miR-143-3p  | CTB-73N10.1    |
| hsa-miR-374b-5p | RP11-147L13.14 | hsa-miR-186-5p  | MIR133A1HG    | hsa-miR-374b-5p | RP11-466F5.10  |
| hsa-miR-421     | RP11-147L13.14 | hsa-miR-221-3p  | MIR133A1HG    | hsa-miR-125b-5p | KDM4A-AS1      |
| hsa-miR-143-3p  | RP11-28G8.1    | hsa-miR-374b-5p | AC004053.1    | hsa-miR-27b-3p  | AL133243.3     |
| hsa-miR-27b-3p  | RP11-28G8.1    | hsa-miR-186-5p  | AC004053.1    | hsa-miR-143-3p  | RP4-635E18.7   |
| hsa-miR-143-3p  | RP11-43N5.1    | hsa-miR-26b-5p  | RP11-151A6.4  | hsa-miR-186-5p  | LINC01422      |
| hsa-miR-499a-5p | RP11-713M15.1  | hsa-miR-421     | RP11-151A6.4  | hsa-miR-140-3p  | LINC01422      |
| hsa-miR-27b-3p  | RP11-274H2.3   | hsa-miR-146b-5p | RP11-151A6.4  | hsa-miR-25-3p   | CTD-2278I10.1  |
| hsa-miR-34a-5p  | RP11-404O13.1  | hsa-miR-25-3p   | CTD-3162L10.1 | hsa-miR-378a-3p | PRSS51         |
| hsa-miR-499a-5p | CTB-113P19.4   | hsa-miR-125b-5p | CTD-3162L10.1 | hsa-miR-378h    | PRSS51         |
| hsa-miR-148b-3p | PSMD6-AS2      | hsa-miR-378h    | RP11-297C4.2  | hsa-miR-34a-5p  | RP5-1042K10.13 |
| hsa-miR-186-5p  | RP11-106M7.1   | hsa-miR-378a-3p | RP11-297C4.2  | hsa-miR-499a-5p | RP5-1042K10.13 |
| hsa-miR-27b-3p  | RP11-106M7.1   | hsa-miR-374b-5p | RP3-413H6.2   | hsa-miR-186-5p  | RP11-73M11.3   |
| hsa-miR-499a-5p | RP11-106M7.1   | hsa-miR-27b-3p  | RP11-452C8.1  | hsa-miR-374b-5p | RP11-541P9.3   |
| hsa-miR-148b-3p | RP11-106M7.1   | hsa-miR-186-5p  | LINC00525     | hsa-miR-143-3p  | RP5-1027G4.3   |
| hsa-miR-148a-3p | RP11-106M7.1   | hsa-miR-26b-5p  | CTD-2626G11.2 | hsa-miR-34a-5p  | LINC00371      |
| hsa-miR-27b-3p  | RP11-166B2.8   | hsa-miR-221-3p  | CTD-2626G11.2 | hsa-miR-186-5p  | LINC00371      |
| hsa-miR-125b-5p | RNASEH2B-AS1   | hsa-miR-27b-3p  | RP11-448G15.3 | hsa-miR-421     | RP13-39P12.3   |
| hsa-miR-140-3p  | RNASEH2B-AS1   | hsa-miR-148a-3p | RP5-1021I20.5 | hsa-miR-148b-3p | RP13-39P12.3   |

|                 |                |                 |               |                 |                     |
|-----------------|----------------|-----------------|---------------|-----------------|---------------------|
| hsa-miR-378h    | RNASEH2B-AS1   | hsa-miR-148b-3p | RP5-1021I20.5 | hsa-miR-148a-3p | RP13-39P12.3        |
| hsa-miR-378a-3p | RNASEH2B-AS1   | hsa-miR-186-5p  | AC097382.5    | hsa-miR-25-3p   | RP11-982M15.8       |
| hsa-miR-26b-5p  | RP11-817I4.2   | hsa-miR-27b-3p  | TEX26-AS1     | hsa-miR-421     | CECR3               |
| hsa-miR-186-5p  | RP11-817I4.2   | hsa-miR-125b-5p | TEX26-AS1     | hsa-miR-25-3p   | CECR3               |
| hsa-miR-374b-5p | EPB41L4A-AS1   | hsa-miR-27b-3p  | RP11-516C1.1  | hsa-miR-374b-5p | LINC01330           |
| hsa-miR-499a-5p | EPB41L4A-AS1   | hsa-miR-27b-3p  | SPACA6P-AS    | hsa-miR-125b-5p | LINC01330           |
| hsa-miR-374b-5p | PCGEM1         | hsa-miR-148b-3p | RP11-769O8.1  | hsa-miR-26b-5p  | LINC01330           |
| hsa-miR-26b-5p  | PCGEM1         | hsa-miR-143-3p  | LINC01344     | hsa-miR-148b-3p | KIZ-AS1             |
| hsa-miR-143-3p  | RP5-884M6.1    | hsa-miR-374b-5p | RNF139-AS1    | hsa-miR-148a-3p | KIZ-AS1             |
| hsa-miR-146b-5p | RP11-290O12.2  | hsa-miR-26b-5p  | RNF139-AS1    | hsa-miR-186-5p  | LINC00161           |
| hsa-miR-125b-5p | LINC00488      | hsa-miR-148a-3p | RP11-307C19.2 | hsa-miR-27b-3p  | LINC00161           |
| hsa-miR-374b-5p | LINC00488      | hsa-miR-186-5p  | DEPDC1-AS1    | hsa-miR-221-3p  | RP5-984P4.6         |
| hsa-miR-499a-5p | LINC00488      | hsa-miR-146b-5p | EFCAB14-AS1   | hsa-miR-199a-5p | XXbac-<br>B135H6.18 |
| hsa-miR-34a-5p  | RP11-543D5.1   | hsa-miR-27b-3p  | RP11-255M2.2  | hsa-miR-34a-5p  | RP11-273G15.2       |
| hsa-miR-27b-3p  | CTD-2265M8.2   | hsa-miR-148a-3p | RP11-196H14.2 | hsa-miR-148b-3p | RP11-273G15.2       |
| hsa-miR-27b-3p  | DLX6-AS1       | hsa-miR-148b-3p | RP11-196H14.2 | hsa-miR-199a-5p | RP11-273G15.2       |
| hsa-miR-26b-5p  | DLX6-AS1       | hsa-miR-34a-5p  | RP5-858L17.1  | hsa-miR-148a-3p | RP11-273G15.2       |
| hsa-miR-186-5p  | DLX6-AS1       | hsa-miR-221-3p  | LINC01093     | hsa-miR-34a-5p  | CTB-39G8.3          |
| hsa-miR-374b-5p | DLX6-AS1       | hsa-miR-34a-5p  | CTC-472C24.1  | hsa-miR-143-3p  | NARF-IT1            |
| hsa-miR-421     | DLX6-AS1       | hsa-miR-143-3p  | RP11-415J8.3  | hsa-miR-125b-5p | NARF-IT1            |
| hsa-miR-125b-5p | DLX6-AS1       | hsa-miR-199a-5p | RP11-415J8.3  | hsa-miR-25-3p   | RP11-672L10.6       |
| hsa-miR-143-3p  | DLX6-AS1       | hsa-miR-146b-5p | LUCAT1        | hsa-miR-125b-5p | RP11-672L10.6       |
| hsa-miR-143-3p  | CTD-2002H8.2   | hsa-miR-421     | LUCAT1        | hsa-miR-374b-5p | ITPK1-AS1           |
| hsa-miR-378a-3p | CTD-2616J11.16 | hsa-miR-199a-5p | LUCAT1        | hsa-miR-34a-5p  | ITPK1-AS1           |
| hsa-miR-378h    | CTD-2616J11.16 | hsa-miR-186-5p  | LUCAT1        | hsa-miR-26b-5p  | CTC-471C19.1        |
| hsa-miR-34a-5p  | RP11-12A2.3    | hsa-miR-378h    | YEATS2-AS1    | hsa-miR-27b-3p  | CTC-471C19.1        |
| hsa-miR-25-3p   | RP11-12A2.3    | hsa-miR-378a-3p | YEATS2-AS1    | hsa-miR-186-5p  | CTC-471C19.1        |

|                 |                |                 |               |                 |               |
|-----------------|----------------|-----------------|---------------|-----------------|---------------|
| hsa-miR-148b-3p | RP11-127B20.2  | hsa-miR-34a-5p  | YEATS2-AS1    | hsa-miR-199a-5p | RP11-132M7.3  |
| hsa-miR-148a-3p | RP11-127B20.2  | hsa-miR-146b-5p | CTD-2501M5.1  | hsa-miR-186-5p  | RP11-132M7.3  |
| hsa-miR-221-3p  | RP11-127B20.2  | hsa-miR-34a-5p  | CTD-2501M5.1  | hsa-miR-421     | RP11-549L6.3  |
| hsa-miR-374b-5p | RP11-127B20.2  | hsa-miR-199a-5p | AC012613.2    | hsa-miR-27b-3p  | RP4-778K6.3   |
| hsa-miR-186-5p  | LL0XNC01-7P3.1 | hsa-miR-34a-5p  | AC012613.2    | hsa-miR-25-3p   | CTC-250I14.3  |
| hsa-miR-125b-5p | LL0XNC01-7P3.1 | hsa-miR-143-3p  | RP11-166B2.5  | hsa-miR-34a-5p  | CADM3-AS1     |
| hsa-miR-148a-3p | LL0XNC01-7P3.1 | hsa-miR-27b-3p  | AC008088.4    | hsa-miR-125b-5p | CADM3-AS1     |
| hsa-miR-421     | LL0XNC01-7P3.1 | hsa-miR-148b-3p | AC008088.4    | hsa-miR-378h    | RP11-509A17.3 |
| hsa-miR-148b-3p | LL0XNC01-7P3.1 | hsa-miR-148a-3p | AC008088.4    | hsa-miR-378a-3p | RP11-509A17.3 |
| hsa-miR-34a-5p  | RP11-638I2.4   | hsa-miR-374b-5p | LINC00969     | hsa-miR-199a-5p | RP11-509A17.3 |
| hsa-miR-146b-5p | CTD-2170G1.2   | hsa-miR-34a-5p  | LINC00969     | hsa-miR-125b-5p | RP11-509A17.3 |
| hsa-miR-143-3p  | CTD-2170G1.2   | hsa-miR-148b-3p | RP11-872J21.3 | hsa-miR-25-3p   | RP11-509A17.3 |
| hsa-miR-148b-3p | CTD-2170G1.2   | hsa-miR-26b-5p  | CTD-2085J24.3 | hsa-miR-140-3p  | AC012314.8    |
| hsa-miR-148a-3p | CTD-2170G1.2   | hsa-miR-27b-3p  | RP11-351J23.2 | hsa-miR-374b-5p | RP11-504P24.9 |
| hsa-miR-34a-5p  | CTD-2170G1.2   | hsa-miR-34a-5p  | RP11-64B16.4  | hsa-miR-146b-5p | RP11-1E4.1    |
| hsa-miR-499a-5p | RP11-718O11.1  | hsa-miR-421     | RP11-981G7.6  | hsa-miR-143-3p  | RP11-148K1.12 |
| hsa-miR-374b-5p | RP11-415I12.3  | hsa-miR-148b-3p | RP11-981G7.6  | hsa-miR-374b-5p | RP11-33B1.3   |
| hsa-miR-374b-5p | RP11-300G22.2  | hsa-miR-148a-3p | RP11-981G7.6  | hsa-miR-421     | RP11-278L15.2 |
| hsa-miR-27b-3p  | RP11-66B24.4   | hsa-miR-125b-5p | CASK-AS1      | hsa-miR-186-5p  | RP11-278L15.2 |
| hsa-miR-25-3p   | RP11-66B24.4   | hsa-miR-34a-5p  | LINC01285     | hsa-miR-374b-5p | AC005614.3    |
| hsa-miR-199a-5p | RP11-66B24.4   | hsa-miR-125b-5p | AF196972.9    | hsa-miR-186-5p  | AC005614.3    |
| hsa-miR-125b-5p | RP11-66B24.4   | hsa-miR-146b-5p | RP11-565A3.2  | hsa-miR-25-3p   | RP11-490B18.6 |
| hsa-miR-186-5p  | CTC-523E23.5   | hsa-miR-378h    | RP11-565A3.2  | hsa-miR-221-3p  | RP11-55K13.1  |



|                 |               |                 |               |                 |                |
|-----------------|---------------|-----------------|---------------|-----------------|----------------|
| hsa-miR-27b-3p  | CTC-523E23.5  | hsa-miR-378a-3p | RP11-565A3.2  | hsa-miR-499a-5p | RP11-28F1.2    |
| hsa-miR-125b-5p | RP11-197N18.7 | hsa-miR-27b-3p  | RP11-1391J7.1 | hsa-miR-140-3p  | RP11-317M11.1  |
| hsa-miR-186-5p  | CTD-2282P23.2 | hsa-miR-140-3p  | CTD-2184D3.5  | hsa-miR-143-3p  | RP11-122C5.3   |
| hsa-miR-199a-5p | AC139100.3    | hsa-miR-125b-5p | CTD-2184D3.5  | hsa-miR-186-5p  | LINC00202-1    |
| hsa-miR-140-3p  | AC139100.3    | hsa-miR-421     | RP11-504P24.8 | hsa-miR-378h    | LINC00202-1    |
| hsa-miR-374b-5p | CH17-262A2.1  | hsa-miR-146b-5p | RP11-504P24.8 | hsa-miR-378a-3p | LINC00202-1    |
| hsa-miR-143-3p  | RP11-728E14.3 | hsa-miR-186-5p  | RP11-504P24.8 | hsa-miR-125b-5p | RP11-363E6.4   |
| hsa-miR-27b-3p  | RP11-728E14.3 | hsa-miR-378h    | RP11-504P24.8 | hsa-miR-421     | RP11-667M19.2  |
| hsa-miR-146b-5p | RP11-728E14.3 | hsa-miR-140-3p  | AKT3-IT1      | hsa-miR-125b-5p | RP11-768B22.2  |
| hsa-miR-421     | RP11-728E14.3 | hsa-miR-199a-5p | RP11-573D15.8 | hsa-miR-499a-5p | RP11-768B22.2  |
| hsa-miR-26b-5p  | RP11-728E14.3 | hsa-miR-143-3p  | RP11-573D15.8 | hsa-miR-374b-5p | RP11-77E14.2   |
| hsa-miR-374b-5p | RP11-728E14.3 | hsa-miR-374b-5p | AC005754.8    | hsa-miR-140-3p  | RP3-402G11.27  |
| hsa-miR-499a-5p | RP11-728E14.3 | hsa-miR-186-5p  | AC005754.8    | hsa-miR-125b-5p | RP11-181G12.4  |
| hsa-miR-143-3p  | RP11-66A2.2   | hsa-miR-34a-5p  | AC005754.8    | hsa-miR-146b-5p | DGCR5          |
| hsa-miR-34a-5p  | RP11-856M7.1  | hsa-miR-148b-3p | RP11-297C4.1  | hsa-miR-186-5p  | RP11-50I19.2   |
| hsa-miR-374b-5p | AC090616.2    | hsa-miR-378h    | RP11-480D4.2  | hsa-miR-146b-5p | RP11-326E22.1  |
| hsa-miR-199a-5p | AP000345.1    | hsa-miR-378a-3p | RP11-480D4.2  | hsa-miR-143-3p  | RP1-78B3.1     |
| hsa-miR-140-3p  | RP11-344P13.4 | hsa-miR-125b-5p | RP11-285G1.2  | hsa-miR-374b-5p | RP1-78B3.1     |
| hsa-miR-125b-5p | AC124997.1    | hsa-miR-125b-5p | PRR7-AS1      | hsa-miR-221-3p  | RP11-513G11.2  |
| hsa-miR-143-3p  | CTD-2313J17.1 | hsa-miR-125b-5p | RP11-709D24.6 | hsa-miR-421     | RP3-467K16.4   |
| hsa-miR-499a-5p | AC003104.1    | hsa-miR-125b-5p | RP11-473C18.3 | hsa-miR-34a-5p  | RP3-467K16.4   |
| hsa-miR-374b-5p | AC003104.1    | hsa-miR-378h    | RP11-18H21.1  | hsa-miR-499a-5p | RP11-739N10.1  |
| hsa-miR-140-3p  | AF127936.3    | hsa-miR-143-3p  | RP11-18H21.1  | hsa-miR-199a-5p | RP11-739N10.1  |
| hsa-miR-27b-3p  | UBAC2-AS1     | hsa-miR-378a-3p | RP11-18H21.1  | hsa-miR-34a-5p  | RP11-739N10.1  |
| hsa-miR-27b-3p  | RP11-734K21.5 | hsa-miR-26b-5p  | U82695.9      | hsa-miR-148a-3p | RP11-739N10.1  |
| hsa-miR-199a-5p | RPL34-AS1     | hsa-miR-27b-3p  | RP5-836J3.1   | hsa-miR-148b-3p | RP11-739N10.1  |
| hsa-miR-374b-5p | RPL34-AS1     | hsa-miR-186-5p  | RP11-706O15.3 | hsa-miR-421     | RP11-474P2.5   |
| hsa-miR-499a-5p | RPL34-AS1     | hsa-miR-186-5p  | AF131217.1    | hsa-miR-146b-5p | RP11-307C12.13 |

|                 |               |                 |               |                 |               |
|-----------------|---------------|-----------------|---------------|-----------------|---------------|
| hsa-miR-25-3p   | RPL34-AS1     | hsa-miR-146b-5p | AF131217.1    | hsa-miR-148a-3p | RP11-78I14.1  |
| hsa-miR-186-5p  | RP11-660M5.1  | hsa-miR-27b-3p  | AF131217.1    | hsa-miR-148b-3p | RP11-78I14.1  |
| hsa-miR-25-3p   | RP1-79C4.1    | hsa-miR-499a-5p | AF131217.1    | hsa-miR-26b-5p  | H1FX-AS1      |
| hsa-miR-221-3p  | RP1-79C4.1    | hsa-miR-146b-5p | RP11-538D16.2 | hsa-miR-143-3p  | RP3-325F22.3  |
| hsa-miR-146b-5p | RP1-79C4.1    | hsa-miR-421     | RP11-173C1.1  | hsa-miR-148b-3p | RP11-459I19.1 |
| hsa-miR-146b-5p | RP11-61L19.3  | hsa-miR-25-3p   | RP11-167J8.3  | hsa-miR-148a-3p | RP11-459I19.1 |
| hsa-miR-421     | RP11-486G15.2 | hsa-miR-143-3p  | RP11-553A21.3 | hsa-miR-146b-5p | FLJ22763      |
| hsa-miR-25-3p   | RP11-717D12.1 | hsa-miR-143-3p  | MIR4435-1HG   | hsa-miR-221-3p  | FLJ22763      |
| hsa-miR-146b-5p | LINC01583     | hsa-miR-378a-3p | MIR4435-1HG   | hsa-miR-199a-5p | FLJ22763      |
| hsa-miR-125b-5p | LINC01583     | hsa-miR-378h    | MIR4435-1HG   | hsa-miR-186-5p  | FLJ22763      |
| hsa-miR-27b-3p  | GS1-5L10.1    | hsa-miR-421     | MIR4435-1HG   | hsa-miR-143-3p  | FAM170B-AS1   |
| hsa-miR-143-3p  | AC011752.1    | hsa-miR-27b-3p  | RP11-266O8.1  | hsa-miR-26b-5p  | FAM170B-AS1   |
| hsa-miR-27b-3p  | RP3-405J10.3  | hsa-miR-125b-5p | RP11-266O8.1  | hsa-miR-148a-3p | RP11-538I12.3 |
| hsa-miR-148b-3p | RP3-405J10.3  | hsa-miR-199a-5p | RP11-266O8.1  | hsa-miR-27b-3p  | KCNMA1-AS3    |
| hsa-miR-143-3p  | RP3-405J10.3  | hsa-miR-143-3p  | CTD-2609K8.3  | hsa-miR-186-5p  | RP3-395M20.8  |
| hsa-miR-374b-5p | RP11-174G6.5  | hsa-miR-27b-3p  | RP4-798A10.7  | hsa-miR-378a-3p | RP3-395M20.8  |
| hsa-miR-186-5p  | RP11-174G6.5  | hsa-miR-374b-5p | RP4-798A10.7  | hsa-miR-378h    | RP3-395M20.8  |
| hsa-miR-199a-5p | LINC01483     | hsa-miR-25-3p   | AC019117.2    | hsa-miR-125b-5p | RP3-395M20.8  |
| hsa-miR-143-3p  | LINC01483     | hsa-miR-34a-5p  | DIAPH2-AS1    | hsa-miR-374b-5p | ACAP2-IT1     |
| hsa-miR-374b-5p | RP11-73M18.6  | hsa-miR-146b-5p | CTD-2621I17.6 | hsa-miR-186-5p  | RP11-189E14.5 |
| hsa-miR-146b-5p | CLIP1-AS1     | hsa-miR-27b-3p  | CTD-2621I17.6 | hsa-miR-26b-5p  | MIR181A1HG    |
| hsa-miR-25-3p   | RP11-115J16.1 | hsa-miR-27b-3p  | RP11-284N8.3  | hsa-miR-143-3p  | RP11-173B14.4 |
| hsa-miR-146b-5p | RP11-115J16.1 | hsa-miR-34a-5p  | RP11-284N8.3  | hsa-miR-25-3p   | RP11-167B3.3  |
| hsa-miR-186-5p  | CTC-339O9.1   | hsa-miR-146b-5p | RP11-284N8.3  | hsa-miR-186-5p  | AC006159.4    |
| hsa-miR-186-5p  | RP11-44F14.2  | hsa-miR-26b-5p  | RP11-284N8.3  | hsa-miR-186-5p  | DAPK1-IT1     |
| hsa-miR-378h    | RP11-632K5.3  | hsa-miR-186-5p  | RP11-284N8.3  | hsa-miR-25-3p   | DAPK1-IT1     |
| hsa-miR-378a-3p | RP11-632K5.3  | hsa-miR-27b-3p  | AC114812.8    | hsa-miR-27b-3p  | RP11-356O9.2  |
| hsa-miR-186-5p  | CTB-176F20.3  | hsa-miR-26b-5p  | AC091153.4    | hsa-miR-186-5p  | RP11-356O9.2  |

|                 |               |                 |               |                 |                |
|-----------------|---------------|-----------------|---------------|-----------------|----------------|
| hsa-miR-421     | CTB-176F20.3  | hsa-miR-499a-5p | RP11-95G17.2  | hsa-miR-421     | RP11-513G19.1  |
| hsa-miR-26b-5p  | RP3-355L5.4   | hsa-miR-26b-5p  | CTB-46B19.2   | hsa-miR-26b-5p  | RP11-256L6.3   |
| hsa-miR-27b-3p  | CTB-167B5.1   | hsa-miR-374b-5p | AIRN          | hsa-miR-148a-3p | HOTTIP         |
| hsa-miR-146b-5p | RP11-370B11.3 | hsa-miR-186-5p  | RP11-680G24.5 | hsa-miR-148b-3p | HOTTIP         |
| hsa-miR-146b-5p | CTD-2540L5.6  | hsa-miR-186-5p  | XIST          | hsa-miR-143-3p  | HOTTIP         |
| hsa-miR-34a-5p  | RP11-210M15.2 | hsa-miR-374b-5p | XIST          | hsa-miR-125b-5p | RP11-77H9.2    |
| hsa-miR-148b-3p | RP11-311F12.1 | hsa-miR-499a-5p | XIST          | hsa-miR-125b-5p | C1RL-AS1       |
| hsa-miR-148a-3p | RP11-311F12.1 | hsa-miR-421     | XIST          | hsa-miR-146b-5p | AC008269.2     |
| hsa-miR-34a-5p  | RP11-311F12.1 | hsa-miR-34a-5p  | XIST          | hsa-miR-378a-3p | CTD-2528A14.3  |
| hsa-miR-125b-5p | RP11-311F12.1 | hsa-miR-140-3p  | XIST          | hsa-miR-378h    | CTD-2528A14.3  |
| hsa-miR-186-5p  | RP11-474D1.3  | hsa-miR-25-3p   | XIST          | hsa-miR-125b-5p | RP11-20D14.6   |
| hsa-miR-125b-5p | RP11-474D1.3  | hsa-miR-27b-3p  | XIST          | hsa-miR-186-5p  | RP11-20D14.6   |
| hsa-miR-27b-3p  | RP11-474D1.3  | hsa-miR-146b-5p | XIST          | hsa-miR-25-3p   | RP11-20D14.6   |
| hsa-miR-25-3p   | RP11-90P5.5   | hsa-miR-148a-3p | XIST          | hsa-miR-199a-5p | RP11-20D14.6   |
| hsa-miR-186-5p  | RP11-142O6.1  | hsa-miR-378a-3p | CTD-2554C21.2 | hsa-miR-27b-3p  | RP11-290F5.2   |
| hsa-miR-221-3p  | RP11-142O6.1  | hsa-miR-378h    | CTD-2554C21.2 | hsa-miR-143-3p  | LINC00298      |
| hsa-miR-499a-5p | RP11-142O6.1  | hsa-miR-125b-5p | RP11-430C7.5  | hsa-miR-27b-3p  | LINC00298      |
| hsa-miR-27b-3p  | RP11-45A17.2  | hsa-miR-34a-5p  | RP11-10L7.1   | hsa-miR-143-3p  | AC006460.2     |
| hsa-miR-26b-5p  | AC007365.1    | hsa-miR-26b-5p  | RP11-10L7.1   | hsa-miR-27b-3p  | RP11-15I11.3   |
| hsa-miR-199a-5p | AC007365.1    | hsa-miR-140-3p  | RP11-389O22.1 | hsa-miR-26b-5p  | DNAJC3-AS1     |
| hsa-miR-146b-5p | COL4A2-AS1    | hsa-miR-143-3p  | SH3BP5-AS1    | hsa-miR-125b-5p | DNAJC3-AS1     |
| hsa-miR-199a-5p | RP11-53B2.2   | hsa-miR-25-3p   | RP11-11N9.4   | hsa-miR-140-3p  | DNAJC3-AS1     |
| hsa-miR-143-3p  | KB-1674E1.1   | hsa-miR-146b-5p | CTD-2143L24.1 | hsa-miR-34a-5p  | RP11-247I13.11 |
| hsa-miR-374b-5p | KB-1674E1.1   | hsa-miR-221-3p  | CTD-2143L24.1 | hsa-miR-499a-5p | CTD-3116E22.8  |
| hsa-miR-186-5p  | KB-1674E1.1   | hsa-miR-374b-5p | RP11-554D15.1 | hsa-miR-140-3p  | CTD-3116E22.8  |
| hsa-miR-26b-5p  | DPH6-AS1      | hsa-miR-421     | RP11-46E17.8  | hsa-miR-374b-5p | CTD-3116E22.8  |
| hsa-miR-27b-3p  | DPH6-AS1      | hsa-miR-27b-3p  | RP11-46E17.8  | hsa-miR-186-5p  | RP11-1060J15.9 |
| hsa-miR-140-3p  | DPH6-AS1      | hsa-miR-378a-3p | RP11-46E17.8  | hsa-miR-186-5p  | AC015971.2     |

|                 |               |                 |               |                 |               |
|-----------------|---------------|-----------------|---------------|-----------------|---------------|
| hsa-miR-26b-5p  | LINC00427     | hsa-miR-378h    | RP11-46E17.8  | hsa-miR-27b-3p  | C14orf132     |
| hsa-miR-186-5p  | ENTPD3-AS1    | hsa-miR-199a-5p | RP11-46E17.8  | hsa-miR-186-5p  | C14orf132     |
| hsa-miR-148a-3p | EDRF1-AS1     | hsa-miR-186-5p  | RP11-46E17.8  | hsa-miR-34a-5p  | RP11-744I24.3 |
| hsa-miR-148b-3p | EDRF1-AS1     | hsa-miR-27b-3p  | RP4-569D19.8  | hsa-miR-26b-5p  | AP000230.1    |
| hsa-miR-374b-5p | AC105760.3    | hsa-miR-27b-3p  | RP11-95O2.5   | hsa-miR-186-5p  | AP000230.1    |
| hsa-miR-199a-5p | RP11-2O17.2   | hsa-miR-146b-5p | RP11-95O2.5   | hsa-miR-140-3p  | LINC01398     |
| hsa-miR-143-3p  | RP11-661C3.2  | hsa-miR-374b-5p | RP11-258C19.7 | hsa-miR-143-3p  | LINC01337     |
| hsa-miR-26b-5p  | CTD-3195I5.3  | hsa-miR-140-3p  | LINC01585     | hsa-miR-34a-5p  | RP11-197K3.1  |
| hsa-miR-125b-5p | CTD-3195I5.3  | hsa-miR-125b-5p | AC018816.3    | hsa-miR-140-3p  | AC011893.3    |
| hsa-miR-140-3p  | RP11-145M4.2  | hsa-miR-374b-5p | RP11-268P4.6  | hsa-miR-125b-5p | C1orf147      |
| hsa-miR-125b-5p | AC007966.1    | hsa-miR-26b-5p  | ITPKB-IT1     | hsa-miR-140-3p  | CDC42-IT1     |
| hsa-miR-374b-5p | RP5-1092A3.4  | hsa-miR-199a-5p | RP11-386J22.3 | hsa-miR-186-5p  | CDC42-IT1     |
| hsa-miR-186-5p  | RP11-626G11.4 | hsa-miR-125b-5p | RP11-386J22.3 | hsa-miR-146b-5p | LINC01094     |
| hsa-miR-186-5p  | RP3-394A18.1  | hsa-miR-186-5p  | RP11-386J22.3 | hsa-miR-221-3p  | KB-1507C5.3   |
| hsa-miR-34a-5p  | RP3-394A18.1  | hsa-miR-140-3p  | RP11-386J22.3 | hsa-miR-125b-5p | RP11-348J12.2 |
| hsa-miR-26b-5p  | RP3-394A18.1  | hsa-miR-378h    | AC012370.3    | hsa-miR-125b-5p | RP11-421P23.2 |
| hsa-miR-143-3p  | RP3-394A18.1  | hsa-miR-378a-3p | AC012370.3    | hsa-miR-499a-5p | RP11-474G23.3 |
| hsa-miR-148a-3p | RP3-394A18.1  | hsa-miR-221-3p  | AC012370.3    | hsa-miR-140-3p  | SLC6A1-AS1    |
| hsa-miR-199a-5p | RP3-394A18.1  | hsa-miR-26b-5p  | RP11-554A11.4 | hsa-miR-125b-5p | RP11-640N11.2 |
| hsa-miR-148b-3p | RP3-394A18.1  | hsa-miR-421     | RP11-554A11.4 | hsa-miR-143-3p  | RP11-640N11.2 |
| hsa-miR-27b-3p  | RP3-394A18.1  | hsa-miR-499a-5p | RP3-368A4.6   | hsa-miR-186-5p  | RP11-277A4.4  |
| hsa-miR-25-3p   | RP3-394A18.1  | hsa-miR-374b-5p | RP3-368A4.6   | hsa-miR-143-3p  | AC009120.5    |
| hsa-miR-374b-5p | RP3-394A18.1  | hsa-miR-421     | RP3-368A4.6   | hsa-miR-34a-5p  | AC009120.5    |
| hsa-miR-378h    | RP3-394A18.1  | hsa-miR-186-5p  | RP3-368A4.6   | hsa-miR-26b-5p  | PRKCA-AS1     |
| hsa-miR-146b-5p | RP3-394A18.1  | hsa-miR-27b-3p  | RP3-368A4.6   | hsa-miR-186-5p  | PRKCA-AS1     |
| hsa-miR-125b-5p | RP3-394A18.1  | hsa-miR-143-3p  | LINC01447     | hsa-miR-374b-5p | RP11-493E12.2 |
| hsa-miR-221-3p  | RP3-394A18.1  | hsa-miR-125b-5p | LINC01447     | hsa-miR-186-5p  | CTC-506B8.1   |
| hsa-miR-378a-3p | RP3-394A18.1  | hsa-miR-34a-5p  | AC087501.1    | hsa-miR-143-3p  | SSBP3-AS1     |

|                 |               |                 |                     |                 |               |
|-----------------|---------------|-----------------|---------------------|-----------------|---------------|
| hsa-miR-499a-5p | RP3-394A18.1  | hsa-miR-378h    | RP11-22A3.2         | hsa-miR-27b-3p  | AP000797.4    |
| hsa-miR-378h    | RP11-534L20.5 | hsa-miR-26b-5p  | RP11-22A3.2         | hsa-miR-378a-3p | CTD-2528A14.5 |
| hsa-miR-378a-3p | RP11-534L20.5 | hsa-miR-378a-3p | RP11-22A3.2         | hsa-miR-378h    | CTD-2528A14.5 |
| hsa-miR-27b-3p  | RP1-63G5.7    | hsa-miR-221-3p  | AC000120.7          | hsa-miR-421     | LINC00862     |
| hsa-miR-34a-5p  | RP11-285J16.1 | hsa-miR-26b-5p  | AC000120.7          | hsa-miR-143-3p  | CCDC144NL-AS1 |
| hsa-miR-186-5p  | RP11-285J16.1 | hsa-miR-143-3p  | CTB-12O2.1          | hsa-miR-26b-5p  | CCDC144NL-AS1 |
| hsa-miR-148b-3p | MORF4L2-AS1   | hsa-miR-378a-3p | CTB-12O2.1          | hsa-miR-27b-3p  | CCDC144NL-AS1 |
| hsa-miR-148a-3p | MORF4L2-AS1   | hsa-miR-378h    | CTB-12O2.1          | hsa-miR-186-5p  | CCDC144NL-AS1 |
| hsa-miR-374b-5p | RP11-52A20.2  | hsa-miR-186-5p  | BX255923.3          | hsa-miR-34a-5p  | CCDC144NL-AS1 |
| hsa-miR-499a-5p | AC009501.4    | hsa-miR-140-3p  | XXbac-BPGBPG55C20.1 | hsa-miR-140-3p  | FSIP2-AS1     |
| hsa-miR-499a-5p | MALAT1        | hsa-miR-27b-3p  | RP11-799B12.4       | hsa-miR-34a-5p  | LINC00900     |
| hsa-miR-26b-5p  | MALAT1        | hsa-miR-148a-3p | RP11-798G7.8        | hsa-miR-148a-3p | AC092168.2    |
| hsa-miR-143-3p  | MALAT1        | hsa-miR-148b-3p | RP11-798G7.8        | hsa-miR-421     | SLC8A1-AS1    |
| hsa-miR-186-5p  | MALAT1        | hsa-miR-499a-5p | RP11-798G7.8        | hsa-miR-26b-5p  | SLC8A1-AS1    |
| hsa-miR-146b-5p | AC004485.3    | hsa-miR-378a-3p | RP11-88G17.6        | hsa-miR-27b-3p  | SLC8A1-AS1    |
| hsa-miR-186-5p  | DLEU2         | hsa-miR-378h    | RP11-88G17.6        | hsa-miR-27b-3p  | RP1-300G12.2  |
| hsa-miR-374b-5p | RP11-234K19.1 | hsa-miR-186-5p  | RP11-20J15.3        | hsa-miR-143-3p  | RP11-13P5.2   |
| hsa-miR-199a-5p | RP11-415D17.4 | hsa-miR-26b-5p  | RP11-20J15.3        | hsa-miR-146b-5p | RP11-328C8.4  |
| hsa-miR-34a-5p  | RP11-818F20.5 | hsa-miR-125b-5p | RP11-20J15.3        | hsa-miR-199a-5p | AC005042.4    |
| hsa-miR-378a-3p | CTA-398F10.2  | hsa-miR-34a-5p  | RP11-496I9.1        | hsa-miR-186-5p  | RP11-70D24.4  |
| hsa-miR-378h    | CTA-398F10.2  | hsa-miR-26b-5p  | RP11-325L12.7       | hsa-miR-186-5p  | RP11-379B18.6 |
| hsa-miR-125b-5p | CTD-2616J11.3 | hsa-miR-140-3p  | RP1-10C16.1         | hsa-miR-125b-5p | RP11-23N2.4   |

|                 |               |                 |                |                 |               |
|-----------------|---------------|-----------------|----------------|-----------------|---------------|
| hsa-miR-146b-5p | RP11-321G12.1 | hsa-miR-125b-5p | AP000289.6     | hsa-miR-27b-3p  | LINC01085     |
| hsa-miR-125b-5p | PLCB2-AS1     | hsa-miR-27b-3p  | AC007879.2     | hsa-miR-143-3p  | LINC01085     |
| hsa-miR-186-5p  | RP11-377D9.3  | hsa-miR-378h    | CTD-3080P12.3  | hsa-miR-186-5p  | RP11-932O9.9  |
| hsa-miR-27b-3p  | AC093642.3    | hsa-miR-378a-3p | CTD-3080P12.3  | hsa-miR-421     | RP11-946P6.6  |
| hsa-miR-26b-5p  | AC093642.3    | hsa-miR-421     | CTD-3080P12.3  | hsa-miR-143-3p  | RP11-742B18.1 |
| hsa-miR-146b-5p | AFAP1-AS1     | hsa-miR-146b-5p | AC137932.6     | hsa-miR-27b-3p  | RP11-742B18.1 |
| hsa-miR-421     | AFAP1-AS1     | hsa-miR-499a-5p | RP1-225E12.2   | hsa-miR-374b-5p | KCNMB2-AS1    |
| hsa-miR-186-5p  | AFAP1-AS1     | hsa-miR-125b-5p | RP11-70J12.1   | hsa-miR-27b-3p  | KCNMB2-AS1    |
| hsa-miR-378a-3p | RP11-676J12.4 | hsa-miR-421     | RP11-166N17.1  | hsa-miR-26b-5p  | RP11-295H24.5 |
| hsa-miR-378h    | RP11-676J12.4 | hsa-miR-146b-5p | RP11-13N12.1   | hsa-miR-378h    | RP11-496N12.6 |
| hsa-miR-221-3p  | LINC01215     | hsa-miR-148b-3p | RP11-141C7.4   | hsa-miR-378a-3p | RP11-496N12.6 |
| hsa-miR-27b-3p  | LINC01215     | hsa-miR-148a-3p | RP11-141C7.4   | hsa-miR-146b-5p | RP11-214O1.3  |
| hsa-miR-34a-5p  | AC092535.3    | hsa-miR-146b-5p | RP11-141C7.4   | hsa-miR-25-3p   | AC007308.6    |
| hsa-miR-140-3p  | RP13-578N3.3  | hsa-miR-25-3p   | RP11-141C7.4   | hsa-miR-125b-5p | AC007308.6    |
| hsa-miR-27b-3p  | RP11-221N13.3 | hsa-miR-186-5p  | RP11-141C7.4   | hsa-miR-186-5p  | RABGAP1L-IT1  |
| hsa-miR-125b-5p | RP11-221N13.3 | hsa-miR-143-3p  | SND1-IT1       | hsa-miR-125b-5p | RP11-247A12.7 |
| hsa-miR-186-5p  | LINC01555     | hsa-miR-421     | AC006145.4     | hsa-miR-27b-3p  | RP11-486O13.4 |
| hsa-miR-25-3p   | RP5-956O18.2  | hsa-miR-499a-5p | AC006145.4     | hsa-miR-26b-5p  | RP11-246A10.1 |
| hsa-miR-421     | RP11-30L3.2   | hsa-miR-499a-5p | RP11-727F15.13 | hsa-miR-146b-5p | GS1-279B7.1   |
| hsa-miR-146b-5p | RP5-933B4.1   | hsa-miR-374b-5p | RP11-286E11.1  | hsa-miR-146b-5p | RP11-324E6.10 |
| hsa-miR-143-3p  | AC016683.5    | hsa-miR-140-3p  | RP11-351J23.1  | hsa-miR-146b-5p | GRM5-AS1      |
| hsa-miR-26b-5p  | RP11-297N6.4  | hsa-miR-221-3p  | RP11-351J23.1  | hsa-miR-148b-3p | PAQR9-AS1     |
| hsa-miR-140-3p  | RP11-64D24.2  | hsa-miR-125b-5p | RP11-114F10.3  | hsa-miR-378h    | PAQR9-AS1     |
| hsa-miR-143-3p  | RP1-35C21.2   | hsa-miR-34a-5p  | AC006116.19    | hsa-miR-378a-3p | PAQR9-AS1     |
| hsa-miR-125b-5p | MIR497HG      | hsa-miR-34a-5p  | LAMA5-AS1      | hsa-miR-199a-5p | PAQR9-AS1     |
| hsa-miR-186-5p  | RP11-214K3.20 | hsa-miR-186-5p  | LINC00540      | hsa-miR-378h    | LINC00505     |
| hsa-miR-499a-5p | RP11-411B10.2 | hsa-miR-374b-5p | RP11-111M22.4  | hsa-miR-378a-3p | LINC00505     |
| hsa-miR-374b-5p | RP11-411B10.2 | hsa-miR-34a-5p  | TNK2-AS1       | hsa-miR-27b-3p  | RP11-354E11.2 |

|                 |                   |                 |               |                 |               |
|-----------------|-------------------|-----------------|---------------|-----------------|---------------|
| hsa-miR-125b-5p | SRRM2-AS1         | hsa-miR-148b-3p | LINC00894     | hsa-miR-499a-5p | RP11-354E11.2 |
| hsa-miR-148b-3p | RP11-548L20.1     | hsa-miR-148a-3p | LINC00894     | hsa-miR-34a-5p  | CTD-2600O9.2  |
| hsa-miR-148a-3p | RP11-548L20.1     | hsa-miR-374b-5p | RP11-645C24.5 | hsa-miR-148b-3p | RP11-785G17.1 |
| hsa-miR-186-5p  | RP11-212I21.4     | hsa-miR-26b-5p  | RP11-433C9.2  | hsa-miR-26b-5p  | RP11-159H10.3 |
| hsa-miR-374b-5p | RP11-212I21.4     | hsa-miR-499a-5p | RP11-674P19.2 | hsa-miR-143-3p  | RP11-449J21.5 |
| hsa-miR-125b-5p | LINC00843         | hsa-miR-26b-5p  | RP11-674P19.2 | hsa-miR-26b-5p  | DLEU7-AS1     |
| hsa-miR-26b-5p  | LINC00843         | hsa-miR-25-3p   | RP11-674P19.2 | hsa-miR-140-3p  | LINC00486     |
| hsa-miR-499a-5p | RP11-57H12.5      | hsa-miR-140-3p  | RP11-674P19.2 | hsa-miR-148a-3p | LINC00486     |
| hsa-miR-125b-5p | RP11-260E18.1     | hsa-miR-374b-5p | RP11-674P19.2 | hsa-miR-26b-5p  | ZNF793-AS1    |
| hsa-miR-186-5p  | RP11-1D12.2       | hsa-miR-199a-5p | RP11-758M4.4  | hsa-miR-148b-3p | LINC01539     |
| hsa-miR-199a-5p | RP11-480C16.1     | hsa-miR-374b-5p | RP11-758M4.4  | hsa-miR-148a-3p | LINC01539     |
| hsa-miR-27b-3p  | RP11-480C16.1     | hsa-miR-34a-5p  | RP1-122P22.4  | hsa-miR-186-5p  | LINC01539     |
| hsa-miR-374b-5p | RP11-480C16.1     | hsa-miR-34a-5p  | RP11-615I2.6  | hsa-miR-143-3p  | LINC01539     |
| hsa-miR-374b-5p | RP11-932O9.10     | hsa-miR-125b-5p | AC004448.5    | hsa-miR-148a-3p | RP11-141O11.2 |
| hsa-miR-146b-5p | RP11-932O9.10     | hsa-miR-143-3p  | AC004448.5    | hsa-miR-148b-3p | RP11-141O11.2 |
| hsa-miR-186-5p  | AP001628.7        | hsa-miR-34a-5p  | AC004448.5    | hsa-miR-34a-5p  | RP4-539M6.14  |
| hsa-miR-27b-3p  | RP11-10C8.2       | hsa-miR-378h    | AC004448.5    | hsa-miR-146b-5p | AC015849.16   |
| hsa-miR-199a-5p | RP1-5O6.4         | hsa-miR-378a-3p | AC004448.5    | hsa-miR-378h    | AC015849.16   |
| hsa-miR-146b-5p | MIR143HG          | hsa-miR-26b-5p  | MEG9          | hsa-miR-378a-3p | AC015849.16   |
| hsa-miR-186-5p  | RP11-488L18.10    | hsa-miR-186-5p  | KB-1980E6.3   | hsa-miR-140-3p  | AC015849.16   |
| hsa-miR-146b-5p | LINC00861         | hsa-miR-374b-5p | KB-1980E6.3   | hsa-miR-186-5p  | RP11-578F21.6 |
| hsa-miR-143-3p  | LINC00861         | hsa-miR-140-3p  | RP11-370A5.1  | hsa-miR-374b-5p | RP11-578F21.6 |
| hsa-miR-186-5p  | LINC00861         | hsa-miR-143-3p  | RP1-144F13.3  | hsa-miR-34a-5p  | UBE2Q1-AS1    |
| hsa-miR-374b-5p | LINC00861         | hsa-miR-186-5p  | AP000654.4    | hsa-miR-148a-3p | UBE2Q1-AS1    |
| hsa-miR-25-3p   | LINC00861         | hsa-miR-27b-3p  | LINC01267     | hsa-miR-27b-3p  | LINC00475     |
| hsa-miR-143-3p  | RP11-10C24.1      | hsa-miR-143-3p  | RP11-356M20.3 | hsa-miR-125b-5p | LINC00475     |
| hsa-miR-125b-5p | LL22NC03-102D1.18 | hsa-miR-143-3p  | RP11-351M8.1  | hsa-miR-140-3p  | LINC00475     |

|                 |               |                 |               |                 |                  |
|-----------------|---------------|-----------------|---------------|-----------------|------------------|
| hsa-miR-186-5p  | RP11-43F13.3  | hsa-miR-125b-5p | RP11-351M8.1  | hsa-miR-374b-5p | LINC00475        |
| hsa-miR-148a-3p | AC007182.6    | hsa-miR-186-5p  | LINC00271     | hsa-miR-421     | LINC00475        |
| hsa-miR-148b-3p | AC007182.6    | hsa-miR-27b-3p  | RP11-809O17.1 | hsa-miR-34a-5p  | LINC00475        |
| hsa-miR-374b-5p | RP11-243A14.1 | hsa-miR-125b-5p | RP11-809O17.1 | hsa-miR-27b-3p  | LARS2-AS1        |
| hsa-miR-421     | RP11-173A16.2 | hsa-miR-125b-5p | RP11-503C24.6 | hsa-miR-140-3p  | RASGRF2-AS1      |
| hsa-miR-140-3p  | RP11-146I2.1  | hsa-miR-26b-5p  | RP11-408O19.5 | hsa-miR-143-3p  | RP11-508N12.2    |
| hsa-miR-148a-3p | CTC-265F19.3  | hsa-miR-143-3p  | LINC01013     | hsa-miR-125b-5p | RP11-508N12.2    |
| hsa-miR-186-5p  | CRYM-AS1      | hsa-miR-27b-3p  | LINC01013     | hsa-miR-143-3p  | AC107081.5       |
| hsa-miR-27b-3p  | CRYM-AS1      | hsa-miR-143-3p  | AC005537.2    | hsa-miR-25-3p   | LINC00563        |
| hsa-miR-140-3p  | RP11-474P2.6  | hsa-miR-374b-5p | AC005537.2    | hsa-miR-378h    | CTB-91J4.1       |
| hsa-miR-26b-5p  | RP11-474P2.6  | hsa-miR-374b-5p | AC010091.1    | hsa-miR-378a-3p | CTB-91J4.1       |
| hsa-miR-378a-3p | RP11-474P2.6  | hsa-miR-143-3p  | RP11-108M9.3  | hsa-miR-186-5p  | CTA-292E10.9     |
| hsa-miR-378h    | RP11-474P2.6  | hsa-miR-125b-5p | RP11-108M9.3  | hsa-miR-146b-5p | CTA-292E10.9     |
| hsa-miR-374b-5p | RP11-474P2.6  | hsa-miR-143-3p  | CTD-2024I7.13 | hsa-miR-374b-5p | CTA-292E10.9     |
| hsa-miR-186-5p  | RP11-474P2.6  | hsa-miR-374b-5p | CTD-2024I7.13 | hsa-miR-378h    | CTA-292E10.9     |
| hsa-miR-34a-5p  | RP11-6I2.3    | hsa-miR-499a-5p | RP11-344N10.5 | hsa-miR-378a-3p | CTA-292E10.9     |
| hsa-miR-421     | RP11-6I2.3    | hsa-miR-186-5p  | RP11-344N10.5 | hsa-miR-26b-5p  | CTA-292E10.9     |
| hsa-miR-140-3p  | RP11-148B6.1  | hsa-miR-374b-5p | TRPC5OS       | hsa-miR-499a-5p | CTA-292E10.9     |
| hsa-miR-27b-3p  | RP11-473M20.9 | hsa-miR-34a-5p  | RP11-456H18.2 | hsa-miR-143-3p  | CTA-292E10.9     |
| hsa-miR-125b-5p | RP5-1184F4.5  | hsa-miR-143-3p  | LINC00856     | hsa-miR-25-3p   | CTA-292E10.9     |
| hsa-miR-26b-5p  | RP5-1184F4.5  | hsa-miR-378a-3p | LINC00856     | hsa-miR-221-3p  | CTA-292E10.9     |
| hsa-miR-499a-5p | CTD-2341M24.1 | hsa-miR-26b-5p  | AC005082.12   | hsa-miR-199a-5p | CTA-292E10.9     |
| hsa-miR-143-3p  | LINC01206     | hsa-miR-199a-5p | AP002954.4    | hsa-miR-140-3p  | CTA-292E10.9     |
| hsa-miR-140-3p  | LINC01206     | hsa-miR-148b-3p | AP002954.4    | hsa-miR-499a-5p | ADAM20P1         |
| hsa-miR-27b-3p  | LINC01206     | hsa-miR-378a-3p | TPTEP1        | hsa-miR-378a-3p | RP5-1028K7.2     |
| hsa-miR-146b-5p | LINC01206     | hsa-miR-378h    | TPTEP1        | hsa-miR-378h    | RP5-1028K7.2     |
| hsa-miR-186-5p  | LINC01206     | hsa-miR-199a-5p | TPTEP1        | hsa-miR-186-5p  | RP11-445L13__B.3 |



|                 |                 |                 |               |                 |               |
|-----------------|-----------------|-----------------|---------------|-----------------|---------------|
| hsa-miR-199a-5p | LINC01206       | hsa-miR-143-3p  | TPTEP1        | hsa-miR-125b-5p | RP11-356J5.13 |
| hsa-miR-186-5p  | RP11-230F18.5   | hsa-miR-374b-5p | TPTEP1        | hsa-miR-34a-5p  | RP11-356J5.13 |
| hsa-miR-125b-5p | ZNF436-AS1      | hsa-miR-146b-5p | TPTEP1        | hsa-miR-27b-3p  | RP11-90B9.3   |
| hsa-miR-199a-5p | ZNF436-AS1      | hsa-miR-421     | TPTEP1        | hsa-miR-140-3p  | AC018890.6    |
| hsa-miR-186-5p  | RP11-1078H9.5   | hsa-miR-27b-3p  | SEMA6A-AS1    | hsa-miR-143-3p  | RP11-57H14.4  |
| hsa-miR-125b-5p | CTA-246H3.12    | hsa-miR-148a-3p | SEMA6A-AS1    | hsa-miR-146b-5p | RP11-145P16.3 |
| hsa-miR-140-3p  | CTA-246H3.12    | hsa-miR-146b-5p | DARS-AS1      | hsa-miR-125b-5p | RP11-758H9.2  |
| hsa-miR-421     | CTA-246H3.12    | hsa-miR-25-3p   | DARS-AS1      | hsa-miR-143-3p  | RP11-863P13.3 |
| hsa-miR-34a-5p  | RP11-476D10.1   | hsa-miR-140-3p  | DARS-AS1      | hsa-miR-26b-5p  | KCNMA1-AS1    |
| hsa-miR-27b-3p  | ZBTB20-AS1      | hsa-miR-186-5p  | DARS-AS1      | hsa-miR-34a-5p  | KCNMA1-AS1    |
| hsa-miR-140-3p  | RP11-422J15.1   | hsa-miR-374b-5p | DARS-AS1      | hsa-miR-186-5p  | RP11-1C8.5    |
| hsa-miR-186-5p  | RP11-1060G2.2   | hsa-miR-143-3p  | DARS-AS1      | hsa-miR-143-3p  | RP11-1C8.5    |
| hsa-miR-26b-5p  | DOCK4-AS1       | hsa-miR-27b-3p  | RP11-103B5.4  | hsa-miR-148b-3p | RP11-274B21.9 |
| hsa-miR-374b-5p | DOCK4-AS1       | hsa-miR-140-3p  | RP1-90G24.11  | hsa-miR-148a-3p | RP11-274B21.9 |
| hsa-miR-34a-5p  | LINC00384       | hsa-miR-378a-3p | AC005281.2    | hsa-miR-374b-5p | RP11-274B21.9 |
| hsa-miR-378h    | LINC00384       | hsa-miR-378h    | AC005281.2    | hsa-miR-146b-5p | RP1-134E15.3  |
| hsa-miR-25-3p   | LINC00384       | hsa-miR-499a-5p | AF131215.4    | hsa-miR-125b-5p | RP11-700H6.2  |
| hsa-miR-378a-3p | LINC00384       | hsa-miR-186-5p  | AF131215.4    | hsa-miR-140-3p  | USP46-AS1     |
| hsa-miR-374b-5p | AC005550.3      | hsa-miR-221-3p  | AF131215.4    | hsa-miR-27b-3p  | CTC-360G5.9   |
| hsa-miR-143-3p  | AC090587.2      | hsa-miR-421     | FGD5-AS1      | hsa-miR-125b-5p | VWA8-AS1      |
| hsa-miR-421     | RP3-461P17.10   | hsa-miR-421     | RP11-305O6.3  | hsa-miR-186-5p  | RP11-16C1.2   |
| hsa-miR-140-3p  | RP11-65J3.15    | hsa-miR-146b-5p | RP11-70D24.3  | hsa-miR-186-5p  | RP1-265C24.8  |
| hsa-miR-143-3p  | RP1-90G24.6     | hsa-miR-27b-3p  | RP11-886P16.6 | hsa-miR-374b-5p | RP1-265C24.8  |
| hsa-miR-186-5p  | RP11-235G24.1   | hsa-miR-499a-5p | RP5-855D21.2  | hsa-miR-143-3p  | AC022819.3    |
| hsa-miR-143-3p  | RP11-809C18.3   | hsa-miR-143-3p  | CTD-3051D23.4 | hsa-miR-143-3p  | VIPR1-AS1     |
| hsa-miR-27b-3p  | RP11-406H23.2   | hsa-miR-34a-5p  | RP11-359G22.2 | hsa-miR-125b-5p | RP5-1142A6.8  |
| hsa-miR-378a-3p | RP1-213J1P__B.1 | hsa-miR-140-3p  | RP11-186N15.3 | hsa-miR-143-3p  | RP11-138I17.1 |
| hsa-miR-378h    | RP1-213J1P__B.1 | hsa-miR-421     | RP11-376M2.2  | hsa-miR-34a-5p  | LINC00272     |

---

|             |           |              |             |
|-------------|-----------|--------------|-------------|
| hsa-miR-421 | LINC00645 | hsa-miR-378h | ANKRD10-IT1 |
|-------------|-----------|--------------|-------------|

---

---

**Table S6.** Core genes obtained by cytoHubba's five methods.

| <b>Name</b>            | <b>BC</b> | <b>Clo</b> | <b>Degree</b> | <b>EPC</b> | <b>RAD</b> |
|------------------------|-----------|------------|---------------|------------|------------|
| <i>KLC2_16990_AP</i>   | 809.31    | 57.25      | 2             | 40.86      | 4.17       |
| <i>KLC2_16992_RI</i>   | 809.31    | 57.25      | 2             | 38.94      | 4.17       |
| <i>ABAT_33905_AA</i>   | 3345.61   | 58.25      | 2             | 39.10      | 4.23       |
| <i>hsa-miR-125b-5p</i> | 13604.63  | 85.67      | 55            | 55.98      | 4.83       |
| <i>hsa-miR-148a-3p</i> | 5927.85   | 63.68      | 27            | 51.18      | 4.12       |
| <i>hsa-miR-25-3p</i>   | 5095.70   | 61.67      | 19            | 47.40      | 4.34       |
| <i>hsa-miR-499a-5p</i> | 6582.81   | 64.35      | 28            | 43.62      | 4.13       |
| <i>RP6-159A1.4</i>     | 809.31    | 57.25      | 2             | 41.15      | 4.17       |
| <i>LL0XNC01-7P3.1</i>  | 809.31    | 57.25      | 2             | 41.01      | 4.17       |
| <i>CTD-3162L10.1</i>   | 1594.77   | 56         | 2             | 40.88      | 4.10       |
| <i>AC004448.5</i>      | 2042.34   | 57.5       | 2             | 38.05      | 4.19       |
| TOP 15                 | 809.31    | 50.83      | 2             | 36.761     | 3.84       |

---

**Table S7.** Correlation between *ABAT* methylation probes and *ABAT\_33905\_AP* expression in KIRC.

| Methylation probe | Cor      | P-value  |
|-------------------|----------|----------|
| cg02564313        | -0.07523 | 0.165739 |
| cg16586594        | 0.061454 | 0.25775  |
| cg01221157        | 0.02398  | 0.659032 |
| cg07439546        | -0.04176 | 0.442113 |
| cg00220102        | 0.062111 | 0.25269  |
| cg16704802        | -0.10655 | 0.049294 |
| cg22217807        | -0.12534 | 0.020605 |
| cg03389720        | 0.094953 | 0.079956 |
| cg08241330        | 0.063134 | 0.244938 |
| cg07740911        | -0.01757 | 0.746525 |
| cg04332619        | 0.045426 | 0.403043 |
| cg05372963        | 0.018267 | 0.736787 |
| cg09489090        | -0.00927 | 0.864564 |
| cg10292855        | 0.028503 | 0.599919 |
| cg26915924        | 0.044824 | 0.40931  |
| cg07431888        | -0.01913 | 0.724844 |
| cg07336964        | -0.04526 | 0.404789 |
| cg26662674        | 0.054508 | 0.315567 |
| cg20587543        | -0.07961 | 0.142366 |
| cg08877512        | 0.058399 | 0.282207 |
| cg03441945        | 0.076003 | 0.161405 |
| cg01881182        | 0.034771 | 0.522226 |
| cg06604249        | -0.06997 | 0.19743  |
| cg05007180        | -0.04022 | 0.459183 |
| cg03698956        | -0.03438 | 0.526938 |
| cg03500056        | 0.022528 | 0.678488 |

|            |          |          |
|------------|----------|----------|
| cg08834902 | 0.067387 | 0.214525 |
| cg00231389 | 0.062271 | 0.251467 |
| cg26778345 | 0.073246 | 0.177199 |
| cg03142071 | -0.08381 | 0.122416 |
| cg03718620 | -0.05242 | 0.334511 |
| cg15890111 | 0.016985 | 0.754642 |
